# Supplementary material for: A diagnostic real-time PCR assay for the rapid identification of the tomato-potato psyllid, Bactericera cockerelli (Šulc, 1909) and development of a psyllid barcoding database
Source: PubMed Central journal article supplement (PMC7098582; doi:10.1371/journal.pone.0230741), 2020-03-26
Supplement: pone.0230741.s005.pdf [file pone.0230741.s005.pdf]

43 all life stages. It can be used as a surveillance and monitoring tool to further study this  
44 important crop pest and to aid the prevention of outbreaks, or to prevent their spread after  
45 establishment in new areas. <sup>① Overwritten</sup>  
<sup>② Remove stats</sup>  
<sup>③ over word limit</sup>

46 **1. Introduction**

47 The psyllid *Bactericera cockerelli* (Šulc, 1909), (commonly known as "Potato <sup>remove</sup> Psyllids" or  
48 "Tomato-Potato Psyllid"), is a major pest of cultivated Solanaceous crops including potato  
49 and tomato [1]. The feeding <sup>by</sup> of this psyllid causes severe damage to potato plants including:  
50 deformed tubers; production of numerous small, poor quality tubers; curling of leaves and  
51 petioles; and yellowing or purpling of leaves. This leads to stunted growth and loss of yield  
52 [2]. *Bactericera cockerelli* is also the main vector of 'Candidatus Liberibacter solanacearum'  
53 (Lso) which is associated with Zebra Chip and <sup>psyllid yellows refers to the feeding damage described above</sup> psyllid yellows in Central and North America  
54 and New Zealand [3–8].

55 While *B. cockerelli* prefers to complete its life cycle on Solanaceous plants it is ~~also able to~~ <sup>can also complete development on species of</sup>  
56 ~~reproduce on~~ Convolvulaceae (Bindweeds and Morning Glories) [9]. There ~~may also be an~~  
57 ~~association with~~ *B. cockerelli* and plants in the <sup>not true</sup> Lamiaceae (mints and deadnettles) but this is  
58 ~~based on incidental observations from glasshouses with high~~ *B. cockerelli* infection [10]. In  
59 addition, adult *B. cockerelli* have been found on over 40 species belonging to 20 families,  
60 however most of these are either casual, food or shelter plants on which the psyllid is  
61 unable to complete a full life cycle and/or transmit Lso [2,10–16]. Four biotypes of *B.*

62 *cockerelli* have been described according to polymorphisms in the mitochondrial  
63 cytochrome *c oxidase subunit I* (COI) gene and represent geographically distinct populations;  
64 central, western, north-western, and south-western [17,18]. These populations have been  
65 observed to differ in their ability to spread Lso [18,19]. <sup>can't make this claim either, you might be able to say that infection rates appear to differ among haplotypes, but Swisher did not compare rates statistically,</sup>

66 *Bactericera cockerelli* is thought to originate from South-Western USA and Mexico [2,12]  
67 and from here has spread via natural and human-mediated dispersal to extend its range in  
68 Northern and Central America and to Oceania where it is now established in New Zealand  
69 [20] and more recently Western Australia [21]. In Central America, *B. cockerelli* has been  
70 found as far south as Nicaragua [22] but has not currently been found in Costa Rica or  
71 Panama [23]. This psyllid has now established small populations in Canada [24] where  
72 previously it was not thought to overwinter. After a period of surveillance, in 2017, *B.*  
73 *cockerelli* was found in areas of Western Australia [21], however Lso has not yet been  
74 detected in psyllids or plants in these locations. In 2017, all developmental stages of *B.*  
75 *cockerelli* were found in two locations in Ecuador on potato plants. This represents the first  
76 finding of *B. cockerelli* in South America [25].

77 The phloem-limited bacterium '*Candidatus Liberibacter solanacearum*' (Lso) is a pathogen  
78 associated with Zebra Chip disease of potatoes [3,26–28] and disease in other Solanaceous  
79 crops such as cultivated tomato [1,3,29,30], pepper [31], eggplant [32], tobacco [22,33] and  
80 tomatillo [29]. Currently, *B. cockerelli* is the main vector of Lso in field and glasshouse-grown  
81 Solanaceous plants in the United States, Mexico, areas of Central America [30–33], Canada  
82 [24] and New Zealand [5,6,28]. While 9 haplotypes of Lso have hitherto been described in  
83 the literature (A, B, C, D, E, F, G, H, and U) only three of the haplotypes, A, B and F, are  
84 associated with disease in Solanaceous plants. Haplotypes A, B, and F are associated with  
85 Zebra chip disease in America [3,34,35], whereas only haplotype A has been found in New  
86 <sup>Haplotype B is also found in *Bactericera maculipes*</sup> Zealand [5,36]. The remaining haplotypes are not vectored by *B. cockerelli* but by closely  
87 related species in the Triozidae family. Haplotype G was found in 49 year-old herbarium  
88 specimens of *Solanum umbelliferum* [37] but it is not known if it is able to infect potato.

89 Haplotypes C, D, and E are associated with disease in Apiaceous crops in Europe [27,38–41]  
90 and Northern Africa [42,43]. Lso Haplotypes D and E are vectored mainly by *Bactericera*  
91 *trigonica* and to a lesser extent *Bactericera nigricornis* and *Bactericera tremblayi* [41,44,45].  
92 These closely related *Bactericera* spp. are morphologically similar and substantial taxonomic  
93 expertise is required to accurately identify species. Currently the geographic distribution of  
94 *B. cockerelli* does not overlap with *B. trigonica* and *B. nigricornis* which makes field  
95 identification easier. However, in the event of an outbreak of *B. cockerelli* molecular  
96 diagnostic methods allow rapid identification by non-specialists and is particularly valuable  
97 in areas where other *Bactericera* spp. co-occur.

98 Haplotype C is found in Northern Europe where it is mainly vectored by *Trioza apicalis*  
99 which, together with psyllid feeding, causes up to 100% loss of Apiaceous crops in Finland  
100 [46,47] and Sweden [28] following transmission. Haplotype U is found in asymptomatic  
101 *Urtica dioica* (stinging nettle) and is vectored by the psyllid *Trioza urticae* but is not yet  
102 known to cause economic damage [48]. It seems that psyllid-mediated infection of host  
103 plants with Lso only occurs when the psyllid vector is on its preferred host. Infection of  
104 carrot plants with Lso haplotypes vectored by *B. cockerelli* and infection of potato plants by  
105 carrot psyllid vectored Lso only occurs very rarely *in-vitro* and suggests that an efficient  
106 vector is necessary for wide-scale spread of Lso [49]. Monitoring and prevention of the  
107 spread of *B. cockerelli* is essential to prevent the risk of an outbreak of Lso on potato,  
108 tomato and other Solanaceous crops in areas where it is not currently found [50].

109 The impact of *B. cockerelli* and associated Lso transmission on agriculture is significant. Since  
110 its arrival in New Zealand circa 2005 via human-mediated dispersal it has caused millions of  
111 dollars of economic losses [20]. In 2008, the reduction in exports of capsicum and losses in

203 To calculate standard curves DNA standards of *B. cockerelli* were prepared using dilution  
204 series of linearized cloned plasmid DNA. DNA was extracted as above using the non-  
205 destructive method, amplified and cloned into competent *Escherichia coli* cells using the  
206 TOPO TA cloning kit (Thermo-Fisher). DNA from successfully transformed colonies was  
207 extracted using "PureYield Plasmid Miniprep System" (Promega). For assay validation DNA  
208 was cloned from other psyllid species (Supp Tab. S1). Real-time PCRs were performed in 15  
209  $\mu$ l volumes including: 6.75  $\mu$ l Jumpstart Taq Ready Mix (Sigma); 1.2  $\mu$ l  $MgCl_2$  (25mM); 0.45  $\mu$ l  
210 of each primer; 0.15  $\mu$ l probe; 4  $\mu$ l of molecular grade water (Sigma); and 2  $\mu$ l of template  
211 DNA. Primer concentration,  $MgCl_2$  concentration and temperature was adjusted for  
212 validation and optimization of the assay as described below. Reactions were performed on a  
213 "QuantStudio 6 Flex" (Applied Biosystems) real-time PCR machine and analysis was done on  
214 the "QuantStudio Real-Time PCR Software" (Applied Biosystems).

## 215 **2.5. Assay validation**

### 216 **2.5.1. Specificity**

217 The final primer and probe set was tested on genomic DNA from 47 *B. cockerelli* specimens  
218 from different life stages. These included the 4 US biotypes [17,67] and specimens from  
219 New Zealand to determine false negatives. The assay was tested for specificity against  
220 genomic DNA of 73 non-target psyllid species collected as mentioned above, to detect false  
221 positives. This included a total of 8 other closely related *Bactericera* spp. and the major  
222 vectors of Lso on Apiaceous crops (*B. nigricornis*, *B. trigonica* and *Trioza apicalis*). All  
223 information on specimens and DNA samples can be found in (Supp Tab. S1) All reactions  
224 with non-target psyllid DNA were run in conjunction with a TaqMan Exogenous Internal  
225 Positive Control Reagent Kit (Applied Biosystems) to ensure false positives were not

This table is referenced a lot.  
make it a real table

271 Biosystems) and “CFX Manager 3.1” (BioRad). The methodology used followed the European  
272 Network of GMO Laboratories (ENGL) recommendations [68].

### 273 3. RESULTS

#### 274 3.1. DNA extraction, PCR, and DNA sequencing for identification of psyllids

275 DNA from 110 psyllid specimens comprising 73 different species were extracted, amplified  
276 and sequenced successfully from either CO1 or ITS2 gene regions, or (Supp Tab. S1).

Submitted to NCBI?  
provide accession numbers

#### 277 3.2. Bioinformatics and Real-Time PCR Assay Design.

278 While differentiation within both the ITS2 and CO1 gene regions was sufficient to  
279 discriminate between psyllid species, the ITS2 gene region was more suitable for TaqMan  
280 assay design for *B. cockerelli*. Similarities between CO1 gene sequences between members  
281 of the *Bactericera* genus and *B. cockerelli* were higher than in the ITS2 region (average %  
282 similarity =  $82.51 \pm 0.68$  for CO1 and  $77.80 \pm 4.79$  for ITS2) (Tab. 1). The ITS2 region showed  
283 larger sections of variability along the gene on which to design primers and probes. Several  
284 primer and probe sets passed the selection criteria, but most were unsuitable due to high  
285 rate of false positives from closely related *Bactericera* species. The final primer and probe  
286 set Bcoc\_JSK2 (Tab. 2) targets a 187bp region of the ITS2 gene (Fig. 1).

| Species             | ITS2         |     |              | CO1          |     |              |
|---------------------|--------------|-----|--------------|--------------|-----|--------------|
|                     | % Similarity | bp  | GC content % | % Similarity | bp  | GC content % |
| <i>B. trigonica</i> | 78.96        | 662 | 59.3         | 82.88        | 509 | 35.4         |
| <i>B. tremblayi</i> | 79.16        | 665 | 59.1         | 82.97        | 682 | 33           |

|                            |                            |     |       |   |     |   |     |                 |
|----------------------------|----------------------------|-----|-------|---|-----|---|-----|-----------------|
| 160725.B.coc.06.col.0<br>4 | transformed <i>E. coli</i> | Lab | 11.78 | 6 | 100 | / | TBC | Cloned,<br>10ng |
| 160725.B.coc.07.col.0<br>8 | transformed <i>E. coli</i> | Lab | 11.67 | 6 | 100 | / | TBC | Cloned,<br>10ng |

297 **Table 3:** Information on *Bactericera cockerelli* samples tested with Bcoc\_JSK2 assay  
 298 including genomic DNA from adults, immatures, single eggs and egg batches. Location of  
 299 samples collection is also included. All samples gave 100% positives with the assay, samples  
 300 were run in at least duplicate. GenBank accession numbers relating to sequenced CO1 and  
 301 ITS2 regions are included.

302 **Figure 1.** CLUSTAL-W alignment of ITS2 regions from closely related *Bactericera* species  
 303 showing variable regions and the gene target for the Bcoc\_JSK2 primer and probe set. Bases  
 304 shades with black show differences to *B. cockerelli* sequence. Colour highlights locations of  
 305 forward primer (blue highlight); reverse primer (green highlight) and probe (yellow  
 306 highlight). The probe and reverse primer are reverse compliments of the highlighted regions  
 307 here.

### 308 **3.3. Specificity and Sensitivity**

309 This assay did not amplify DNA from any of the 73 non-target psyllid species when tested at  
 310 60 °C with primer concentration 0.2 µ/mol. This included 8 closely related *Bactericera*  
 311 species with similar ITS2 and CO1 sequences (Tab. 1). Under optimal conditions, false  
 312 negatives = 0% for all non-target species tested with pure genomic DNA, giving a diagnostic  
 313 specificity of 100%. Some suboptimal reaction conditions showed 33% false positives against  
 314 high concentrations (10 ng / 1 ng) of *Bactericera albiventris* cloned DNA as mentioned  
 315 below. All *B. cockerelli* genomic DNA samples gave positive results (Tab. 3) giving 0% false  
 316 negatives across 54 biological replicates and 147 technical replicates; resulting in a  
 317 diagnostic sensitivity of 100%. These included *B. cockerelli* specimens from each of the four  
 318 US biotypes as well as specimens from New Zealand. These specimens included adults,

immatures and eggs. The assay can amplify *B. cockerelli* DNA from both cloned and genomic samples. Under optimal conditions for PCR efficiency and specificity (60 °C, 0.2 µM primer, 1.5 mM MgCl<sub>2</sub>) the limit of detection was 0.00001 ng DNA across a range of different reaction parameters this equates to 200 copy numbers of ITS2 calculated using the following equation: Number of Copies = (ng DNA x 6.022x10<sup>23</sup>) ÷ (length of gene region in base pairs \* 1x10<sup>9</sup> \* 660). The copy number calculator available at <http://scienceprimer.com/copy-number-calculator-for-realtime-pcr> was used. Diagnostic sensitivity was 100% on all DNA extracted from *B. cockerelli* immatures. False negatives from DNA from egg extractions were 0% for single eggs and 0% for batches of 3 and 10 eggs.

#### 3.4. Repeatability and Reproducibility

No significant differences were found between C<sub>t</sub> means across the different replicates at different concentrations as tested by two-way ANOVA ( $F_{5, 25} = 0.54$ ,  $p = 0.955$ ). The assay also performed consistently across different machines and there was no significant difference between runs across the two machines as tested by two-way ANOVA ( $F_{1, 5} = 1.28$ ,  $p = 0.279$ ).

#### 3.5. Robustness/Optimization

The assays amplified *B. cockerelli* DNA at all primer concentrations, MgCl<sub>2</sub> concentrations and annealing temperatures with varying levels of efficiency, precision, and sensitivity (Supp Tabs. S2-S4). At primer concentration, 0.5 µM the assay was less sensitive only amplifying up to 0.001 ng DNA. At higher primer concentrations (0.5 and 1.0) the assay showed higher sensitivity, but efficiency was outside the range for acceptable use. The assay performed optimally at 0.2 µM primer concentration showing good efficiency and high sensitivity

363 different treatments and was shown to be robust and unaffected by small changes in assay  
364 set-up (Supp Tab. S5). Each treatment gave 100% positives for amplification of *B. cockerelli*  
365 genomic DNA.

366 **4. Discussion** lots of repeating. consider a combined results & discussion

367 We have designed and validated the first species-specific, qualitative real-time PCR TaqMan  
368 assay for *B. cockerelli* by using the comparison of 73 non-target species to identify unique  
369 gene regions that were suitable for primer/probe design and species differentiation. The  
370 assay was also tested on 9 closely related *Bactericera* species. The number of species used  
371 in our study is relatively high compared to other reported TaqMan assays for plant pests  
372 that report lower numbers of non-target species [69,70]. The ITS2 region was found to be  
373 suitable for assay design as it contained high intraspecific variation consisting of stretches of  
374 insertions and deletions (INDELs), which are ideal diagnostic sites for primer and probe  
375 design. Although COI is classically used for species discrimination, mutations were less  
376 clustered which is likely due to third base degeneracy. The ITS2 region can also be used to  
377 distinguish species phylogenetically and has been used to identify cryptic species in the  
378 *Cacopsylla pruni* complex [60]. The sequences obtained from this study will improve the  
379 current species representation on online DNA databases, reducing the chance of Type II  
380 errors (i.e. misidentification due to lack of conspecific references) [71]. It is important to  
381 note that the target and non-target specimens consisted of multiple samples of each species  
382 from different geographical regions. This reduced the risk of false negatives that may arise if  
383 during assay design, the target specimens were obtained from a limited geographic spread  
384 and were therefore not representative of the genetic variation within the species. To



385 account for interspecific variation, *B. cockerelli* samples used in the assay validation  
386 consisted of specimens from the four USA biotypes and specimens from New Zealand.  
387 Species identification can be achieved for *B. cockerelli* by sequencing the ITS2 or COI regions  
388 as both loci, to date, have entries in the National Centre for Biotechnology Information  
389 (NCBI) database. However, DNA sequencing is a lengthy process compared to real-time PCR,  
390 which in contrast is a rapid identification method involving fewer pieces of equipment,  
391 reagents, and time both for running the sample, and processing it digitally. The success rates  
392 of eradications are dependent on the length of time between introduction, detection, and  
393 implementation of eradication measures as Lso displays a short transmission time from *B.*  
394 *cockerelli* to potatoes [4,28]. Feasibly, methodology described in this study could be used to  
395 extract DNA from a specimen and test for *B. cockerelli* positives within 12 hrs or quicker.  
396 The assay described in this study can identify *B. cockerelli* specimens from all life stages. It is  
397 robust, reliable and can detect 200 copies (0.00001 ng DNA) of the ITS2 gene region. This is  
398 the first assay which uses a TaqMan real-time PCR module to specifically identify this  
399 important pest species. The assay performs well across a range of annealing temperatures,  
400 MgCl<sub>2</sub> concentrations and primer concentrations and is a robust tool that can be used to  
401 give reliable results despite human error, different lab practices, equipment, standard  
402 operating procedures or PCR set-ups.

Way to many redundant statements

same as line 396

403 The assay can be used on eggs and immatures, as well as adults of *B. cockerelli*, which will  
404 enable the rapid identification of this species from specimens that may be otherwise  
405 impossible to identify. For example, identification of eggs of *B. cockerelli* is not possible  
406 using classical taxonomy methods alone and it is now possible to rapidly identify this cryptic  
407 life stage. In addition, adult females and immatures are considerably more difficult to

408 identify compared to adult males. The genus *Bactericera* currently contains 160 species [56]  
409 and <1% of these have been tested in the current study due to the difficulty obtaining other  
410 specimens from the field or lab colonies. However Europe is home to 26 different species of  
411 *Bactericera*<sup>integrus</sup> 30% of which have been validated using this assay [56]. This assay has been  
412 tested against the *Bactericera* species which are most commonly found in potato and carrot  
413 fields in Europe and the wider EPPO region which should minimize the potential for false  
414 positives and ensure the assay is efficient at detecting outbreaks in European fields.

415 The ability to identify insects to species accurately and quickly is essential to support  
416 national biosecurity measures for the prevention and early detection of new pests and  
417 vectors of disease. Psyllids can be difficult to identify and certain species of concern, such as  
418 *B. cockerelli*, require skilled specialist taxonomists to accurately differentiate between  
419 closely related species that may or may not be of risk to plant health. Entomologists with  
420 the skills required to do so are a valuable yet sparse resource and incorrect identification of  
421 a psyllid species could lead to a delay in national response or inappropriate allocation of  
422 resources to resolve a problem that is not present, possibly leading to the unnecessary  
423 destruction of crops. We have designed a functional tool for reliable, rapid, robust and  
424 accurate identification of the tomato-potato psyllid *B. cockerelli* to support national  
425 biosecurity measures should this pest be found within the EPPO region or other regions  
426 where it could become damaging to agriculture. The situation in New Zealand and recent  
427 interceptions of *B. cockerelli* on aubergine in plant material imported into the UK from  
428 Mexico highlight the risk and pathways for introduction into new areas [54]. Furthermore  
429 immature stages of *B. cockerelli* are commonly intercepted on vegetable material from the  
430 Western-United States and Mexico and adults are occasionally found on leafy vegetables

431 such as lettuce [54]. Recent studies suggest *B. cockerelli* can utilize multiple host-plants  
432 within the Solanaceae and other plant families; the potential for eggs and immatures of *B.*  
433 *cockerelli* to be present on yet undetermined host-plants is likely.

434 The identification of psyllids using classical taxonomy is often aided using information about  
435 the host-plant on which the specimen was found [72]. However, although psyllids are  
436 typically monophagous, some species feed on a few closely related plant species. For  
437 example, northern hemisphere pest species, such as *B. cockerelli* and *B. trignonica*, feed on  
438 several plant species within a family [73]. In the case of *B. cockerelli* its range of host-plants

439 (reproductive, food and incidental) is much wider than originally thought [9,16,74]. Adult  
440 psyllids may also settle on plants that they do not feed on known as a casual plant [75]. It is  
441 possible that: A) *B. cockerelli* can utilise other host-plants and could be overlooked; B) other

442 psyllid species morphologically/ecologically similar to *B. cockerelli* could be mistaken for this  
443 pest if only considering the host plant on which they are found. Therefore, the identification  
444 of suspected host-plant material alone cannot be reliably used for psyllid identification and  
445 for most psyllid species their host-plant range is unknown or fragmentary at best. This assay  
446 can be used to study life parameters of *B. cockerelli* in the field such as oviposition on  
447 reproductive host-plants, as eggs can now be identified.

448 Additionally, host-plant data is sometimes unavailable depending on the trapping method  
449 employed. For example, indirect host-plant data is available from trapping methods at  
450 ground level (e.g. water/sticky traps) with less data available for insects caught beyond the  
451 vegetation layer (e.g. 12.2m suction traps or aerial balloon traps). Unlike spot checks  
452 performed by inspectors directly on plant produce, canopy-level or aerial traps which

no citations for incidental hosts

How do know they don't feed on them? adults do feed on non-host plants.

hosts must be able to complete development

453 provide data at field or regional level [76,77]. A diagnostic assay for *B. cockerelli* is therefore  
454 useful for monitoring its occurrence at several spatial scales, from local border checks to  
455 regional surveys. As some collection methods obtain specimens where host-plant data is not  
456 available, this tool enables rapid screening of psyllids from suction-traps or those collected  
457 in sticky traps, pan traps or similar. However, further validation should be performed to  
458 ensure the assay performs adequately on *B. cockerelli* fragments obtained from these kinds  
459 of traps. The assay can also be used in areas currently known to have *B. cockerelli* to easily  
460 quantify numbers from the field or to monitor migration, distribution and spread of this pest  
461 species.

462 Further validation of this assay however should include its use in several different  
463 laboratories with different practitioners. Different reaction mixes should be tested for their  
464 suitability with this assay and its compatibility with alternative qPCR machines. It is also  
465 valuable to test these primers in a set-up using an inter-collating dye such as Sybr Green.  
466 Additionally, this assay should be tested on further samples of *Bactericera* and other closely

467 related Triozidae psyllids. Further validation of this assay should be performed on more  
468 *Bactericera* species not included in this study and on DNA from Solanaceous host plants.  
469 This will ensure false positives are not obtained from DNA extracted from complex matrices.

this should be done now, plant DNA can be amplified from psyllids

470 Due to being based on real-time PCR chemistry, one limitation of this assay is that it cannot  
471 be taken out into the field, making it less portable than a LAMP assay or other NGS  
472 sequencing techniques such as Nanopore technology.

473 In conclusion a rapid, specific, robust, repeatable and reliable real-time PCR assay has now  
474 been validated and can be used to detect the important pest *B. cockerelli*. This work has
