# Supplementary material for: A diagnostic real-time PCR assay for the rapid identification of the tomato-potato psyllid, Bactericera cockerelli (Šulc, 1909) and development of a psyllid barcoding database
Source: PubMed Central journal article supplement (PMC7098582; doi:10.1371/journal.pone.0230741), 2020-03-26
Supplement: pone.0230741.s007.pdf [file pone.0230741.s007.pdf]

# PLOS ONE

## A diagnostic real-time PCR assay for the rapid identification of the tomato-potato psyllid, *Bactericera cockerelli* (Šulc, 1909) and development of a psyllid barcoding database.

--Manuscript Draft--

|                               |                                                                                                                                                                                                                                                                                                                                                                                                                                                                                                                                                                                                                                                                                                                                                                                                                                                                                                                                                                                                                                                                                                                                                                                                                                                                                                                                                                                                                                                                                                                                                                                                                                                                                                                                                   |
|-------------------------------|---------------------------------------------------------------------------------------------------------------------------------------------------------------------------------------------------------------------------------------------------------------------------------------------------------------------------------------------------------------------------------------------------------------------------------------------------------------------------------------------------------------------------------------------------------------------------------------------------------------------------------------------------------------------------------------------------------------------------------------------------------------------------------------------------------------------------------------------------------------------------------------------------------------------------------------------------------------------------------------------------------------------------------------------------------------------------------------------------------------------------------------------------------------------------------------------------------------------------------------------------------------------------------------------------------------------------------------------------------------------------------------------------------------------------------------------------------------------------------------------------------------------------------------------------------------------------------------------------------------------------------------------------------------------------------------------------------------------------------------------------|
| <b>Manuscript Number:</b>     | PONE-D-19-35047R1                                                                                                                                                                                                                                                                                                                                                                                                                                                                                                                                                                                                                                                                                                                                                                                                                                                                                                                                                                                                                                                                                                                                                                                                                                                                                                                                                                                                                                                                                                                                                                                                                                                                                                                                 |
| <b>Article Type:</b>          | Research Article                                                                                                                                                                                                                                                                                                                                                                                                                                                                                                                                                                                                                                                                                                                                                                                                                                                                                                                                                                                                                                                                                                                                                                                                                                                                                                                                                                                                                                                                                                                                                                                                                                                                                                                                  |
| <b>Full Title:</b>            | A diagnostic real-time PCR assay for the rapid identification of the tomato-potato psyllid, <i>Bactericera cockerelli</i> (Šulc, 1909) and development of a psyllid barcoding database.                                                                                                                                                                                                                                                                                                                                                                                                                                                                                                                                                                                                                                                                                                                                                                                                                                                                                                                                                                                                                                                                                                                                                                                                                                                                                                                                                                                                                                                                                                                                                           |
| <b>Short Title:</b>           | <i>Bactericera cockerelli</i> diagnostic assay                                                                                                                                                                                                                                                                                                                                                                                                                                                                                                                                                                                                                                                                                                                                                                                                                                                                                                                                                                                                                                                                                                                                                                                                                                                                                                                                                                                                                                                                                                                                                                                                                                                                                                    |
| <b>Corresponding Author:</b>  | Jason Charles Sumner-Kalkun, Ph. D.<br>Science and Advice for Scottish Agriculture<br>Edinburgh, UNITED KINGDOM                                                                                                                                                                                                                                                                                                                                                                                                                                                                                                                                                                                                                                                                                                                                                                                                                                                                                                                                                                                                                                                                                                                                                                                                                                                                                                                                                                                                                                                                                                                                                                                                                                   |
| <b>Keywords:</b>              | <i>Bactericera cockerelli</i> , <i>Liberibacter</i> , psyllids, pest insects, plant pathology, molecular biology, real-time PCR, TaqMan Assay, crop protection, phytosanitary, diagnostics, vector, biosecurity,                                                                                                                                                                                                                                                                                                                                                                                                                                                                                                                                                                                                                                                                                                                                                                                                                                                                                                                                                                                                                                                                                                                                                                                                                                                                                                                                                                                                                                                                                                                                  |
| <b>Abstract:</b>              | The accurate and rapid identification of many insect pests is an important step in the prevention and control of outbreaks in areas that are otherwise pest free. The potato-tomato psyllid <i>Bactericera cockerelli</i> (Šulc, 1909) is the main vector of 'Candidatus <i>Liberibacter solanacearum</i> ' on potato and tomato crops in Central and Northern America and New Zealand. This study describes the design and validation of the first species - specific TaqMan probe-based real-time PCR assay, targeting the ITS2 gene region of <i>B. cockerelli</i> . The assay successfully detected <i>B. cockerelli</i> genomic DNA from adults (100% accuracy, n=72); immatures (100% accuracy, n=26) and eggs (100% accuracy, n=25). This assay also detected DNA from cloned plasmids containing the ITS2 region of <i>B. cockerelli</i> (100% accuracy, n=24). The assay showed 0% false positives when tested on genomic and cloned DNA from 73 other psyllid species collected from across Europe, New Zealand and Mexico. This included 8 other species in the <i>Bactericera</i> genus and the main vectors of 'Candidatus <i>Liberibacter solanacearum</i> ' worldwide. The limit of detection for this assay at optimum conditions was 0.000001ng DNA (~200 copies) of ITS2 DNA which equates to around a 1:10000 dilution of DNA from one single adult specimen. This assay is the first real-time PCR based method for accurate, robust, sensitive and specific identification of <i>B. cockerelli</i> from all life stages. It can be used as a surveillance and monitoring tool to further study this important crop pest and to aid the prevention of outbreaks, or to prevent their spread after establishment in new areas. |
| <b>Order of Authors:</b>      | Jason Charles Sumner-Kalkun, Ph. D.<br>MJ Sjölund<br>YM Arnsdorf<br>M Carnegie<br>F Hight<br>D Ouvrard<br>AFC Greenslade<br>JR Bell<br>R Sigvald<br>DM Kenyon                                                                                                                                                                                                                                                                                                                                                                                                                                                                                                                                                                                                                                                                                                                                                                                                                                                                                                                                                                                                                                                                                                                                                                                                                                                                                                                                                                                                                                                                                                                                                                                     |
| <b>Response to Reviewers:</b> | Dear Dr Sean Michael Prager,<br>Please find enclosed our revised manuscript entitled "A diagnostic real-time PCR assay for the rapid identification of the tomato-potato psyllid, <i>Bactericera cockerelli</i> (Šulc, 1909) and development of a psyllid barcoding database". We thank you and the                                                                                                                                                                                                                                                                                                                                                                                                                                                                                                                                                                                                                                                                                                                                                                                                                                                                                                                                                                                                                                                                                                                                                                                                                                                                                                                                                                                                                                               |

reviewers for your careful review of our submitted manuscript and the opportunity to resubmit an improved version. We find the comments to be fair and constructive and have helped to improve the final manuscript. Please see below our responses to points raised by the reviewer's comments and the amendments we have made to the final manuscript. We provide a copy of the resubmitted manuscript with track changes and track changes accepted. Line numbers refer to those given in the resubmitted manuscript with track changes accepted.

We hope that you will consider this revised manuscript of a high enough standard to be published in PLOS ONE.

Yours Sincerely,  
Dr Jason C Sumner-Kalkun  
(on behalf of all co-authors)

•Thank you for considering our work for publication in your journal. We found all reviewer comments to be useful and constructive and appreciate you overall assessment of the manuscript. We are pleased to have the opportunity to resubmit an improved version. We have made considerable efforts to condense the introduction and discussion section to include only relevant information and to streamline the manuscript. We agree that there was some duplication and repetition in the discussion, and it has been re-written accordingly. We decided, due to the technical nature of the paper that a separate results and discussion section was more appropriate. We have addressed the reviewer concerns regarding data availability and all sequence data has been uploaded to GenBank and is now free to be made publicly available. We hope that our amendments are deemed adequate to meet the high standards of PLOS ONE and are excited about the possibility of publishing with you.

#### REVIEWER COMMENTS TO AUTHOR

Reviewer #1: This manuscript describes a qPCR assay to identify potato psyllid intercepted in shipments. The assay is paramount to Europe's ability to detect potential introductions of this psyllid, which would be harmful to agricultural production. The authors describe the assay and confirmed that it does not amplify the ITS gene of other psyllids. My major concern for the manuscript is that it is overwritten and over-interpreted. The study is very simple - qPCR assay to detect potato psyllid - yet the text is over 50 pages long, includes unrelated information in the introduction, and includes an overly long discussion. The manuscript should be re-written to focus only on the assay and its use in trade commodities. Specific comments are provided in an attached document. I will apologize for my handwriting.

#### MAJOR POINTS

We appreciate your thorough assessment of our manuscript and thank you for your time. We found your comments very constructive and helpful. We have taken the care to reduce the introduction and discussion sections considerably to provide more focus on the assay and its uses, removing a lot of the duplication. The manuscript has been edited down to 31 pages + supplementary material. We attempted to produce a combined results and discussion section but felt that, due to the technical nature of the paper, keeping these separate was preferable. We hope that you will agree with this assessment on reading the improved version.

On the recommendation of the reviewer on line 486 of the previous manuscript we have performed the assay on Potato DNA to check for cross-reaction. No false positives were obtained from 8x reps of 3 Potato samples "Maris Piper" variety.

#### MINOR POINTS

- 1.Line 45: Abstract overwritten, stats to be removed, word count reduced  
-The abstract Line 21-39 has been reduced in size with all stats removed and is now within the word limit (252 words)
- 2.Line 47: Remove "-" in "Potato-Psyllids"  
-Changed to "Potato Psyllid" now line 41
- 3.Line 49: "The feeding of..." To be changed to "Feeding by"  
-Changed as suggested now line 43
- 4.Line 53: Psyllid yellows refers to the feeding damage described above.  
-Removed to avoid confusion and improve accuracy. Line 47
- 5.Lines 55-56: Change "...is also able to reproduce on..." to "...can also complete development on species of..."  
-Changed as suggested line 49-50
- 6.Lines 56-58: Statement not deemed true  
-Statement removed line 51

7.Line 61: Remove statement on Lso transmission to non-host plants of *B. cockerelli*  
 -Statement removed line 53

8.Line 64-65: Remove claims about *B.cockerelli* populations observed to differ in their ability to spread Lso  
 -Changed to: "Evidence suggests that these genetic types may differ in their ability to spread Lso..." Lines 56-57

9.Line 86: Haplotype B is also found in *Bactericera maculipennis*  
 -Information added to the text line 71

10.Line 111: typo capsicum not italics  
 -Changed to "...Capsicum..." line 84

11.Line 223:This table is referenced a lot, make it a real table  
 -Supp Tab. S1 now changed to Table 1. In results section Line 244-250. Cited on lines: 244. Supp Tabs 2-4 renumbered to Supp Tabs 1-3 and Tables 1-3 renumbered to Tables 2-4.

12.Line 276: Submitted to NCBI? Provide accession numbers  
 -Accession numbers added to Table 1. Lines 246-252 and Table 4. Lines 271-276

13.Line 314-315: change "...cloned DNA as mentioned below." To "...DNA below".  
 -Changed to "...cloned DNA (see below)." Line 290

14.Line 319: change "immatures" to "nymphs"  
 -The term "immatures" is preferred by leading psyllid taxonomists Daniel Burckhardt and David Ouvrard, that latter of whom is an author on this paper. See ref: (Burckhardt et al. 2014). We have kept the term "immatures" or "immature life stages" throughout. Burckhardt D, Ouvrard D, Queiroz D, Percy D (2014) Psyllid Host-Plants (Hemiptera: Psylloidea): Resolving a Semantic Problem. Florida Entomol 97:242–246 .  
<https://doi.org/10.1653/024.097.0132>

15.Line 411: "...Bactericera..." to be italicised  
 -Changed to italics. Line 354

16.Lines 439-441: Section to be re-written as inaccurate wording used  
 -This section was removed in the re-write of the discussion.

17.Line 468: Suggestion to perform further validation on Solanaceous DNA  
 -3 x samples of *Solanum tuberosum* 'Maris Piper' were tested and were negative results added to lines: 194-196 and 284-285. Also results of primer blast etc. did not return any hits for *Solanum* species or any plant sequences.

Reviewer #2  
 -We are thankful to the reviewer for their detailed and careful examination of our paper. They have provided very useful, constructive comments regarding the technical aspects of the paper and have informed us of errors in the finer details. We hope we have incorporated changes to their satisfaction, and we have endeavoured to clear up the technical details that were missing or incorrect.

1.Data availability  
 -Psyllid DNA sequences have been uploaded to GenBank and accession numbers are provided in Tab1. And Tab4; lines 246-252 and 271-276 respectively.

2.Page 8 Line 163: What part of the body is used for micro-dissection to extract DNA?  
 The authors should describe the micro-dissection procedure in more detail rather than only citing the papers.  
 -The non-destructive DNA extraction method is described on lines 121 – 132. "Micro-dissection" was used here to describe the piercing of the abdomen and thorax. "Micro-dissection" has been changed to "pierced" as a more appropriate term (line 126).

3.Page 8 Line 172: "For amplification of ITS2 primers CA55p8sFcm-F and CA28sB1d-R [60] and for amplification of CO1 gene regions arthropod barcoding Primers LCO1490 and HCO2198 [61]." The authors should check the grammar here. It is not a complete sentence. It could be "For amplification of ITS2, primers CA55p8sFcm-F and CA28sB1d-R [60] were used, and for amplification of CO1 gene regions, arthropod barcoding Primers LCO1490 and HCO2198 [61] were used."  
 -Changed as suggested lines 135- 137

4.Page 10 Line 204: "DNA was extracted as above using the non-destructive method, amplified and cloned into competent *Escherichia coli* cells using the TOPO TA cloning kit (Thermo-Fisher)." The authors should specify what genes (ITS2 or CO1?) they amplified for cloning, and what restriction enzyme (*EcoRI*?) they used to linearize the plasmid.  
 -Information added and moved from later section 2.5.2 Sensitivity. Now line 171-178

5.Page 10 Line 212: The authors need to list the real time PCR cycling conditions here, for example XX degrees for XX seconds.

-Added lines 178-181

6. Page 10 Line 223: "All reactions with non-target psyllid DNA were run in conjunction with a TaqMan Exogenous Internal Positive Control Reagent Kit (Applied Biosystems) to ensure false positives were not obtained due to inhibition within the reaction". Here, "ensure" should be "rule out the possibility that"

- Changed as suggested lines 196-201

7. Page 11 Line 226: "DNA from all non-target psyllids was sequenced to ensure psyllid DNA was present in all reactions to rule out false negatives due to inefficient DNA extraction." What DNA was sequenced? PCR product from ITS2 or CO1? The authors need to specify

- Details now added to new Tab 1 and citation to table included on lines 246-252

8. Page 11 Line 239: "6 subsequent dilutions were made. Stock DNA 10 ng/μl was linearised using EcoRI restrictions enzyme (New England Biolabs)," Here "6 subsequent dilutions" should be "8 subsequent dilutions", according to the nine point 10-fold dilution series mentioned on Page 11 Line 236.

- Corrected Line 212-213

9. Page 12 Line 252: "A six point 1:10 dilution series starting at 10ng/μl was used with each dilution being performed in triplicate." Here, "six point" should be "nine point" according to Page 11 Line 236.

- Only 6 points were used for repeatability. This is sufficient to analyse standard curves between runs. Lines 222-223 refer to sensitivity experiments only.

10. Page 12 Line 263: "For each tested parameter, optimization was performed across an eight point 1:10 dilution series starting at 10ng DNA." Here, "eight point" should be "nine point", "10ng" should be "10ng/μl".

- Corrected. Line 234

11. In Supplementary table S1, green and red color coding should be explained in the text. What does TBC mean? Accession numbers should be given for all the sequences. Accession numbers in Table 3 should also be given and TBC should be explained.

- We apologise for this error; this colouring has been removed as was an artefact of preparing the table and shouldn't have been included in the submitted version. TBC was used to show we were waiting for accession numbers. Accession numbers are now added to tables and TBC removed. Tab. 1 lines: 246-247 Tab.4 lines:

12. Page 14 Line 289: "CO1 genes showed higher similarity and generally less conserved and variable regions compared to ITS2 regions." Here "less conserved and variable" should be "less variable".

- Corrected line 266

13. Page 17 Line 310: "0.2 μ/mol" should be "0.2 μM".

- Corrected line 285

14. Page 18 Line 324: "The copy number calculator available at <http://scienceprimer.com/copy-number-calculator-for-realtime-pcr> was used." Here a hyperlink should be created. According to the link and the formula given, 0.00001ng DNA equals 4.879×10000 copies, if length of gene region is considered 187bp (product length of ITS2 in real time PCR). However, the authors calculated that it equals to 200bp. Please double check the calculation.

-Limit of detection is actually 0.000001 ng DNA. This mistake of 10 fold higher amounts stated in the text was found throughout and in tables. We have now corrected them. The correct equation should be:

$$\text{Number of Copies} = (\text{ng DNA}(0.000001) \times 6.022 \times 10^{23}) \div ((\text{length of plasmid } 4656\text{bp} + \text{cloned fragment } 700\text{bp}) * 1 \times 10^9 * 660) = 170.36 \text{ copy numbers.}$$

15. Page 18 Line 337: "At primer concentration, 0.5 μM the assay was less sensitive only amplifying up to 0.001 ng DNA." It should be "At primer concentration 0.5 μM, the assay was less sensitive only amplifying up to 0.001 ng DNA."

-Corrected. Lines 313-314

16. Page 18 Line 338: "At higher primer concentrations (0.5 and 1.0) the assay showed higher sensitivity" Here "(0.5 and 1.0)" should be "(1.0 μM)".

-Corrected. Line 314

17. Page 19 Line 350: "The precision of the assay was lower at higher MgCl<sub>2</sub> concentrations 6mM and 8mM (Supp Tab. S3)." Here "6mM and 8mM" should be "7.5mM and 9mM".

-Corrected. Lines 326-327

18. Page 19 Line 354: "Reactions at 58 °C were 10 to 100-fold less sensitive than reactions at 58 °C." Here it should be "Reactions at 58 °C were 10 to 100-fold less sensitive than reactions at 64 °C."

|                                                                                                                                                                                                                                                                                                                                    |                                                                                                                                                                                                                                                                                                                                                                                                                                                                                                                                                                                                                                                                                                                                                                                                                                                                                                                                                                                                                                                                                                                                                                                                                                                                                                                                                                                                                                                                                                                                                                                                                                                                                                                                                                                                                                                                                                                                                                                                                                                                                                                                                                                                                                                                                                                                                                                                                                                                                                                                                                                                                                                                                                                                                                                                                                                                                                                                                                                                                                                                                                                                                                            |
|------------------------------------------------------------------------------------------------------------------------------------------------------------------------------------------------------------------------------------------------------------------------------------------------------------------------------------|----------------------------------------------------------------------------------------------------------------------------------------------------------------------------------------------------------------------------------------------------------------------------------------------------------------------------------------------------------------------------------------------------------------------------------------------------------------------------------------------------------------------------------------------------------------------------------------------------------------------------------------------------------------------------------------------------------------------------------------------------------------------------------------------------------------------------------------------------------------------------------------------------------------------------------------------------------------------------------------------------------------------------------------------------------------------------------------------------------------------------------------------------------------------------------------------------------------------------------------------------------------------------------------------------------------------------------------------------------------------------------------------------------------------------------------------------------------------------------------------------------------------------------------------------------------------------------------------------------------------------------------------------------------------------------------------------------------------------------------------------------------------------------------------------------------------------------------------------------------------------------------------------------------------------------------------------------------------------------------------------------------------------------------------------------------------------------------------------------------------------------------------------------------------------------------------------------------------------------------------------------------------------------------------------------------------------------------------------------------------------------------------------------------------------------------------------------------------------------------------------------------------------------------------------------------------------------------------------------------------------------------------------------------------------------------------------------------------------------------------------------------------------------------------------------------------------------------------------------------------------------------------------------------------------------------------------------------------------------------------------------------------------------------------------------------------------------------------------------------------------------------------------------------------------|
|                                                                                                                                                                                                                                                                                                                                    | <p>-Corrected. Lines 330-331<br/> 19. Page 20 Line 367: "We have designed and validated the first species-specific, qualitative real-time PCR TaqMan assay for <i>B. cockerelli</i> by using the comparison of 73 non-target species to identify unique gene regions that were suitable for primer/probe design and species differentiation." Here "qualitative" should be "quantitative".<br/> -Changed to quantitative. Line 351</p> <p>Reviewer #3<br/> -We thank the reviewer for their thoughtful assessment of our manuscript and are pleased that only minor corrections were found throughout. The corrections have improved the manuscript greatly and have ironed out some important technical errors. We hope that our amendments are deemed satisfactory and have covered the issues they have raised.</p> <p>1. Page 8 line 175: please replace amount of primers used with final concentration of primers (or add this)<br/> - Added. Line 138</p> <p>2. Page 10 line 213: please add cycling conditions of real time PCR, as done for CO1 and ITS2 amplification<br/> -Added lines 178-181</p> <p>3. Table 1: should include also <i>B. cockerelli</i>, so to include fragment size of amplicons for this species. In alternative, fragment sizes can be added to the main text<br/> -B. cockerelli added to table 2. Line 262-263</p> <p>4. Table 3: not clear what the "/" symbol in the CO1 column means<br/> -Samples with / were not amplified in this region. Accession numbers for each sample have been added and this is explained better in the text. Lines: 252 Tab.1 ; 276 Tab. 4</p> <p>5. Page 17 line 310: please check spelling of concentration<br/> -Corrected to <math>\mu</math>M. Line 285</p> <p>6. Page 17 line 316: numbers seem not to add up: how many technical replicates were used per sample?<br/> -Information on technical reps is incorporated into table 4. Some samples were tested in duplicate, triplicate or 6x replicates.</p> <p>7. Page 18 line 323: I have tried the formula myself using the concentration (0.00001 ng) and fragment size (187 bp) specified by the authors, but I get a quite different number of ITS2 copies (about 50,000 versus 200). Please double check, and add actual numbers to the formula.<br/> - Limit of detection is actually 0.000001 ng DNA. This mistake of 10-fold higher amounts stated in the text was found throughout and in tables. We have now corrected them. The correct equation should be:<br/> Number of Copies = (ng DNA(0.000001) x 6.022x10<sup>23</sup>) ÷ ((length of plasmid 4656bp + cloned fragment 700bp) * 1x10<sup>9</sup> * 660) = 170.36 copy numbers.</p> <p>8. Of some concern is the author's answer to the data accessibility question. Authors stated that they are not going to make all data available, with a generic "Some restrictions will apply". Please explain what data will not be made accessible and why.<br/> - All data will be made available. Accession numbers were not available at the time of submission as they were restricted by one or more of our projects until we had consent to upload them to public databases.</p> |
| <b>Additional Information:</b>                                                                                                                                                                                                                                                                                                     |                                                                                                                                                                                                                                                                                                                                                                                                                                                                                                                                                                                                                                                                                                                                                                                                                                                                                                                                                                                                                                                                                                                                                                                                                                                                                                                                                                                                                                                                                                                                                                                                                                                                                                                                                                                                                                                                                                                                                                                                                                                                                                                                                                                                                                                                                                                                                                                                                                                                                                                                                                                                                                                                                                                                                                                                                                                                                                                                                                                                                                                                                                                                                                            |
| <b>Question</b>                                                                                                                                                                                                                                                                                                                    | <b>Response</b>                                                                                                                                                                                                                                                                                                                                                                                                                                                                                                                                                                                                                                                                                                                                                                                                                                                                                                                                                                                                                                                                                                                                                                                                                                                                                                                                                                                                                                                                                                                                                                                                                                                                                                                                                                                                                                                                                                                                                                                                                                                                                                                                                                                                                                                                                                                                                                                                                                                                                                                                                                                                                                                                                                                                                                                                                                                                                                                                                                                                                                                                                                                                                            |
| <p><b>Financial Disclosure</b></p> <p>Enter a financial disclosure statement that describes the sources of funding for the work included in this submission. Review the <a href="#">submission guidelines</a> for detailed requirements. View published research articles from <a href="#">PLOS ONE</a> for specific examples.</p> | <p>DK: This work was supported by the EU Horizon2020 Programme under grant agreement No. 635646, POnTE (Pest Organisms Threatening Europe) <a href="https://ec.europa.eu/programmes/horizon2020/en">https://ec.europa.eu/programmes/horizon2020/en</a> and the Scottish Government [RRL/001/14].</p> <p>JB: The Rothamsted Insect Survey, a National Capability, is funded by the Biotechnology and Biological Sciences Research Council under the Core Capability Grant BBS/E/C/000J0200. <a href="https://bbsrc.ukri.org/funding/">https://bbsrc.ukri.org/funding/</a></p> <p>The funders had no role in study design, data collection and analysis, decision to publish, or preparation of the manuscript.</p>                                                                                                                                                                                                                                                                                                                                                                                                                                                                                                                                                                                                                                                                                                                                                                                                                                                                                                                                                                                                                                                                                                                                                                                                                                                                                                                                                                                                                                                                                                                                                                                                                                                                                                                                                                                                                                                                                                                                                                                                                                                                                                                                                                                                                                                                                                                                                                                                                                                          |

This statement is required for submission and **will appear in the published article** if the submission is accepted. Please make sure it is accurate.

#### Unfunded studies

Enter: *The author(s) received no specific funding for this work.*

#### Funded studies

Enter a statement with the following details:

- Initials of the authors who received each award
- Grant numbers awarded to each author
- The full name of each funder
- URL of each funder website
- Did the sponsors or funders play any role in the study design, data collection and analysis, decision to publish, or preparation of the manuscript?
- **NO** - Include this sentence at the end of your statement: *The funders had no role in study design, data collection and analysis, decision to publish, or preparation of the manuscript.*
- **YES** - Specify the role(s) played.

\* typeset

#### Competing Interests

Use the instructions below to enter a competing interest statement for this submission. On behalf of all authors, disclose any [competing interests](#) that could be perceived to bias this work—acknowledging all financial support and any other relevant financial or non-financial competing interests.

This statement **will appear in the published article** if the submission is accepted. Please make sure it is accurate. View published research articles from [PLOS ONE](#) for specific examples.

The authors have declared that no competing interests exist.

**NO authors have competing interests**

Enter: *The authors have declared that no competing interests exist.*

**Authors with competing interests**

Enter competing interest details beginning with this statement:

*I have read the journal's policy and the authors of this manuscript have the following competing interests: [insert competing interests here]*

\* typeset

**Ethics Statement**

N/A

Enter an ethics statement for this submission. This statement is required if the study involved:

- Human participants
- Human specimens or tissue
- Vertebrate animals or cephalopods
- Vertebrate embryos or tissues
- Field research

Write "N/A" if the submission does not require an ethics statement.

General guidance is provided below. Consult the [submission guidelines](#) for detailed instructions. **Make sure that all information entered here is included in the Methods section of the manuscript.**

**Format for specific study types**

**Human Subject Research (involving human participants and/or tissue)**

- Give the name of the institutional review board or ethics committee that approved the study
- Include the approval number and/or a statement indicating approval of this research
- Indicate the form of consent obtained (written/oral) or the reason that consent was not obtained (e.g. the data were analyzed anonymously)

**Animal Research (involving vertebrate animals, embryos or tissues)**

- Provide the name of the Institutional Animal Care and Use Committee (IACUC) or other relevant ethics board that reviewed the study protocol, and indicate whether they approved this research or granted a formal waiver of ethical approval
- Include an approval number if one was obtained
- If the study involved *non-human primates*, add *additional details* about animal welfare and steps taken to ameliorate suffering
- If anesthesia, euthanasia, or any kind of animal sacrifice is part of the study, include briefly which substances and/or methods were applied

**Field Research**

Include the following details if this study involves the collection of plant, animal, or other materials from a natural setting:

- Field permit number
- Name of the institution or relevant body that granted permission

**Data Availability**

Authors are required to make all data underlying the findings described fully available, without restriction, and from the time of publication. PLOS allows rare exceptions to address legal and ethical concerns. See the [PLOS Data Policy](#) and [FAQ](#) for detailed information.

Yes - all data are fully available without restriction



A Data Availability Statement describing where the data can be found is required at submission. Your answers to this question constitute the Data Availability Statement and **will be published in the article**, if accepted.

**Important:** Stating 'data available on request from the author' is not sufficient. If your data are only available upon request, select 'No' for the first question and explain your exceptional situation in the text box.

Do the authors confirm that all data underlying the findings described in their manuscript are fully available without restriction?

**Describe where the data may be found in full sentences. If you are copying our sample text, replace any instances of XXX with the appropriate details.**

- If the data are **held or will be held in a public repository**, include URLs, accession numbers or DOIs. If this information will only be available after acceptance, indicate this by ticking the box below. For example: *All XXX files are available from the XXX database (accession number(s) XXX, XXX).*
- If the data are all contained **within the manuscript and/or Supporting Information files**, enter the following: *All relevant data are within the manuscript and its Supporting Information files.*
- If neither of these applies but you are able to provide **details of access elsewhere**, with or without limitations, please do so. For example:

*Data cannot be shared publicly because of [XXX]. Data are available from the XXX Institutional Data Access / Ethics Committee (contact via XXX) for researchers who meet the criteria for access to confidential data.*

*The data underlying the results presented in the study are available from (include the name of the third party*

All Co1 and ITS2 sequences area available from GenBank accession numbers (MT021761-MT021824; MT027551-MT027599; MT038907-MT038996; MT040955-MT040966). These will be made accessible on request.

|                                                                                                                                                                                                                                         |  |
|-----------------------------------------------------------------------------------------------------------------------------------------------------------------------------------------------------------------------------------------|--|
| <p><i>and contact information or URL).</i></p> <ul style="list-style-type: none"><li>• This text is appropriate if the data are owned by a third party and authors do not have permission to share the data.</li></ul> <p>* typeset</p> |  |
| Additional data availability information:                                                                                                                                                                                               |  |

1 **Full Title:** A diagnostic real-time PCR assay for the rapid identification of the tomato-potato  
2 psyllid, *Bactericera cockerelli* (Šulc, 1909) and development of a psyllid barcoding database.

3 **Authors**

4 JC Sumner-Kalkun<sup>1\*</sup>, MJ Sjölund<sup>1</sup>, YM Arnsdorf<sup>1</sup>, M Carnegie<sup>1</sup>, F Highet<sup>1</sup>, D Ouvrard<sup>2,5</sup>, AFC  
5 Greenslade<sup>3</sup>, JR Bell<sup>3</sup>, R Sigvald<sup>4</sup>, DM Kenyon<sup>1</sup>

6 <sup>1</sup>SASA, Roddinglaw Road, Edinburgh EH12 9FJ, UK. <sup>2</sup> Department of Life Sciences, Natural  
7 History Museum, Cromwell Road, London SW7 5BD, UK. <sup>3</sup> Rothamsted Insect Survey,  
8 Rothamsted Research, West Common, Harpenden, Hertfordshire, AL5 2JQ, UK. <sup>4</sup>  
9 Department of Ecology, Swedish University of Agricultural Sciences, Box 7044 750 07  
10 Uppsala, Sweden. <sup>5</sup>Entomology and invasive plants Unit, Plant Health Laboratory, ANSES,  
11 755 avenue du campus Agropolis, CS 30016, 34988 Montferrier-sur-Lez Cedex, France

12 \*Corresponding author: [jason.sumner-kalkun@sasa.gov.scot](mailto:jason.sumner-kalkun@sasa.gov.scot)

13 **Short Title:** *Bactericera cockerelli* diagnostic assay

14 **Keywords:** *Bactericera cockerelli*, Biosecurity, Phytosanitary, Diagnostic, Pest, Vector,  
15 '*Candidatus Liberibacter solanacearum*', real-time PCR

16

17

18

19

## 20 **Abstract**

21 The accurate and rapid identification of ~~many~~ insect pests is an important step in the  
22 prevention and control of outbreaks in areas that are otherwise pest free. The potato-  
23 tomato psyllid *Bactericera cockerelli* (Šulc, 1909) is the main vector of ‘*Candidatus*  
24 *Liberibacter solanacearum*’ on potato and tomato crops in ~~Central and Northern~~ America  
25 and New Zealand. This study describes the design and validation of the first species-specific  
26 TaqMan probe-based real-time PCR assay, targeting the ITS2 gene region of *B. cockerelli*.  
27 The assay ~~successfully~~ detected *B. cockerelli* genomic DNA from adults (~~100% accuracy,~~  
28 ~~n=72~~); immatures (~~100% accuracy, n=26~~) and eggs (~~100% accuracy, n=25~~). This assay also  
29 detected DNA from cloned plasmids containing the ITS2 region of *B. cockerelli* (100%  
30 accuracy, n=24). The assay showed 0% false positives when tested on genomic and cloned  
31 DNA from 73 other psyllid species collected from across Europe, New Zealand and Mexico.  
32 This included 8 other species in the *Bactericera* genus and the main vectors of ‘*Candidatus*  
33 *Liberibacter solanacearum*’ worldwide. The limit of detection for this assay at optimum  
34 conditions was 0.000001ng DNA (~200 copies) of ITS2 DNA which equates to around a  
35 1:10000 dilution of DNA from one single adult specimen. This assay is the first real-time PCR  
36 based method for accurate, robust, sensitive and specific identification of *B. cockerelli* from  
37 all life stages. It can be used as a surveillance and monitoring tool to further study this  
38 important crop pest and to aid the prevention of outbreaks, or to prevent their spread after  
39 establishment in new areas.

## 40 **1. Introduction**

41 The psyllid *Bactericera cockerelli* (Šulc, 1909), (commonly known as “Potato Psyllids” or  
42 “Tomato-Potato Psyllid”), is a major pest of cultivated Solanaceous crops including potato

43 and tomato [1]. Feeding by this psyllid causes severe damage to potato plants including:  
44 deformed tubers; production of numerous small, poor quality tubers; curling of leaves and  
45 petioles; and yellowing or purpling of leaves. This leads to stunted growth and loss of yield  
46 [2]. *Bactericera cockerelli* is also the main vector of '*Candidatus Liberibacter solanacearum*'  
47 (Lso) which is associated with Zebra Chip in Central and North America and New Zealand [3–  
48 8].

49 While *B. cockerelli* prefers to complete its life cycle on Solanaceous plants it can also  
50 complete development on species of Convolvulaceae (Bindweeds and Morning Glories) [9].  
51 In addition, adult *B. cockerelli* have been found on over 40 species belonging to 20 families,  
52 however most of these are either casual, food or shelter plants on which the psyllid is  
53 unable to complete a full life cycle [2,10–16]. Four biotypes of *B. cockerelli* have been  
54 described according to polymorphisms in the mitochondrial cytochrome *c oxidase subunit I*  
55 (COI) gene and represent geographically distinct populations; central, western, north-  
56 western, and south-western [17,18]. Evidence suggest that these genetic types may differ in  
57 their ability to spread Lso [18,19].

58 *Bactericera cockerelli* is thought to originate from South-Western USA and Mexico [2,11]  
59 and from here has spread via natural and human-mediated dispersal to extend its range  
60 [20]. Outside America it is now established in New Zealand [21] and more recently Western  
61 Australia [22].

62 The phloem-limited bacterium '*Candidatus Liberibacter solanacearum*' (Lso) is a pathogen  
63 associated with Zebra Chip disease of potatoes [3,23–25] and disease in other Solanaceous  
64 crops such as cultivated tomato [1,3,26,27], pepper [28], eggplant [29], tobacco [30,31] and  
65 tomatillo [26]. Currently, *B. cockerelli* is the main vector of Lso in field and glasshouse-grown

66 Solanaceous plants in the United States, Mexico, areas of Central America [27–30], Canada  
67 [32], New Zealand [5,6,25] and recently Ecuador [33]. The Lso haplotypes have been  
68 described, only three of which are associated with disease in Solanaceous plants. Haplotypes  
69 A, B, and F are associated with Zebra chip disease in America [3,34,35], whereas only  
70 haplotype A has been found in New Zealand [5,36]. Haplotype B has also been found in  
71 *Bactericera maculipennis* (Crawford) [37]. The remaining haplotypes are not vectored by *B.*  
72 *cockerelli* but by closely related species in the Triozidae family.

73 The impact of *B. cockerelli* and associated Lso transmission on agriculture is significant. Since  
74 its arrival in New Zealand circa 2005 via human-mediated dispersal it has caused millions of  
75 dollars of economic losses [6,21]. Similarly, management of *B. cockerelli* in the US is  
76 reported to have cost millions of dollars per year in major potato growing areas such as  
77 Texas [38] and the Pacific North-West [39]. The introduction of *B. cockerelli* into potato  
78 growing regions in Europe or Asia would be devastating to the agricultural industry of those  
79 regions. If *B. cockerelli*, or a sufficient vector of Solanaceous Lso haplotypes, were to invade  
80 Europe it is estimated that the effects of Lso damage on potato and tomato would cost €  
81 222 million per year and the negative impact of social welfare could cost an additional  
82 estimated € 114 million [40].

83 Currently, *B. cockerelli* is considered an A1 quarantine pest in the EPPO region [4].  
84 Consignments of aubergine and *Capsicum* from Mexico infested with immature and adult  
85 stages of *B. cockerelli* were intercepted four times during UK border inspections between  
86 2017-2018; indicating that there is a real threat of this pest making an incursion into the  
87 EPPO region if not properly monitored [41]. Monitoring and prevention of the spread of *B.*  
88 *cockerelli* is essential to prevent the risk of an outbreak of Lso on potato, tomato and other

89 Solanaceous crops in areas where it is not currently found [42]. There is therefore an  
90 evident need for a rapid and accurate diagnostic test to identify *B. cockerelli* at all life stages  
91 not only as a tool to support import inspections, but also to assist monitoring, eradication  
92 and control strategies.

93 We designed a species-specific real-time PCR diagnostic assay to detect all life-stages of *B.*  
94 *cockerelli*, eggs, immatures and adults. The assay provides a rapid diagnostic test to quickly  
95 determine the presence of *B. cockerelli*, allowing for the early detection of  
96 invasions/introductions and aiding in the prevention of spread of this psyllid.

97

## 98 **2. Materials and Methods**

### 99 **2.1. Specimen collection**

100 The assay was tested on 28 target adults *B. cockerelli* specimens and 73 non-target species  
101 consisting of 110 specimens see results section 3.1 for more info on samples. The  
102 classification follows Burckhardt & Ouvrard [43], and a complete taxonomic account of each  
103 species is given in Ouvrard [20]. Psyllid identifications were confirmed against reference  
104 type specimens in the NHM London collections. To account for intraspecific genetic  
105 variation, we obtained *B. cockerelli* specimens from Mexico (Universidad Autónoma Agraria  
106 Antonio Narro) and USA (USDA, Agricultural Research Services) from colony collections of  
107 each of the four recognised biotypes of *B. cockerelli* in Central America, the Central,  
108 Western, ~~North-Western~~, and ~~South-Western~~ biotypes [19]. Specimens of *B. cockerelli* were  
109 also obtained from New Zealand lab-reared colonies (Plant Research, New Zealand). Non-  
110 target specimens were mainly obtained from 12.2 m suction-traps in the United Kingdom

111 that form part of the Rothamsted Insect Survey network described here [44]. Specimens  
112 were also obtained from suction-traps in Finland, Germany, Spain and Sweden; as well as  
113 from field collections from Finland, Israel, Mexico, Serbia, Spain, UK and USA. Non-target  
114 specimens from different regions of the USA were used to test assay specificity on species  
115 that are commonly found in the same region as *B. cockerelli*. As immatures and eggs are the  
116 most likely life stages that inspectors might find on imported plant material, we also tested  
117 the assay on DNA extracted from immatures and eggs from Mexico and the USA for  
118 validation.

## 119 **2.2. DNA extraction, PCR, and DNA sequencing for identification of psyllids**

120 DNA for sequencing and assay validation was extracted from psyllids using a non-destructive  
121 method first described in [45] and adapted from [46]. Psyllid specimens were preserved in  
122 95% Ethanol: 5% Glycerol solution. Using a 15mm long, 0.15mm diameter stainless steel  
123 entomological head-less pin (A3 size, Watkins and Doncaster) mounted in a holder,  
124 specimens were initially pierced fully through the abdomen and half-way through the thorax  
125 from the dorsal side while attempting to minimise damage to head, legs, wings, terminalia  
126 and other body parts that are used for taxonomic identification. Pierced specimens were  
127 placed in a microcentrifuge tube containing 180 µl of ATL buffer and 20 µl of proteinase-k as  
128 outlined in the DNeasy Blood and Tissue Kit from Animal Tissues (Qiagen). Samples were  
129 placed in a shaking incubator over-night (~8-10 hrs) at 56 °C at 300 rpm. The protocol for  
130 DNA extraction in DNeasy Blood and Tissue Kit Protocol from Animal Tissues (Qiagen) was  
131 followed and the psyllid integument voucher specimen was stored in 95% Ethanol: 5%  
132 Glycerol for morphological identification. Psyllids were DNA barcoded using one or two gene  
133 regions. The internal transcribed spacer 2 (ITS2) and cytochrome c oxidase subunit 1 (CO1)



134 were amplified and sequenced for identification of different psyllid species. For  
135 amplification of ITS2 primers CA55p8sFcm-F and CA28sB1d-R [47] were used; and for  
136 amplification of CO1 gene regions arthropod barcoding Primers LCO1490 and HCO2198 [48]  
137 were used. All reactions were performed in 20 µl consisting of: 10 µl 2x Type-It  
138 Microsatellite PCR Kit Master Mix (Qiagen); 0.2 µM each forward and reverse primer; 7.2 µl  
139 molecular grade water (Sigma-Aldrich) and 2 µl of psyllid template DNA. Reactions were run  
140 on a Veriti 96-well thermal cycler (Applied Biosystems) using the following programs. ITS2:  
141 95°C for 5 mins; 25 x cycles of (95°C for 30 s, 56°C for 90 s, 72°C for 30 s); and a final  
142 extension at 72°C for 10 mins. CO1: 94°C for 5 mins; 5 x cycles of (94°C for 30s, 45°C for 30s,  
143 72°C for 1 min); 25 x cycles of (94°C for 30s, 51°C for 1 min, 72°C for 1 min); and a final  
144 extension of 72°C for 10 mins. PCR amplified gene regions were cleaned-up using EXO-SAP  
145 and Ethanol precipitation, then sequenced using the BigDye Terminator Cycle Sequencing  
146 Kit (Applied Biosystems), forward and reverse complimentary DNA strands were sequenced  
147 separately for each sample and analysed using a 3500xL Genetic Analyser (Applied  
148 Biosystems).

### 149 **2.3. Bioinformatics and Real-Time PCR Assay Design**

150 Sequence editing, assembly and alignment were performed on “.AB1” trace files uploaded  
151 to Geneious R11 v 11.1.5 (Biomatters Ltd.). Contigs were assembled after trimming sections  
152 of low-quality sequence and aligning the complimentary strands using CLUSTAL-W multiple  
153 sequence alignment method [49]. Final contigs for each species and each gene region were  
154 aligned to identify variable areas suitable as targets for *B. cockerelli* specific primer and  
155 probe sets. Primers and probes were designed using manual selection of target-specific  
156 regions analysed using the “Basic Local Alignment Search Tool” (BLAST) [50] against the

157 NCBI GenBank database [51] and processing of selected regions for suitability/ specificity in  
158 “Primer3” [52] and “Primer-BLAST” software [53]. Primer annealing temperature, hairpin  
159 formation, self-complementarity, GC content and were assessed using “Primer3” [52].  
160 Potential amplification of non-specific insect species was checked using Primer BLAST which  
161 includes all psyllid species present in the GenBank database. Primer and probe sets were  
162 selected/rejected based on the following parameters: primer annealing temperature 59-  
163 62°C; primer annealing temperature + 8-10°C for probe annealing temperature; no more  
164 than 2°C difference in annealing temperature between primers, max probe length 30bp, no  
165 more than 3 Gs in a row in probe, amplicon length max 300bp and specificity to *B. cockerelli*.

#### 166 **2.4. Real-time PCR Set-up and Standards**

167 To calculate standard curves DNA standards of *B. cockerelli* were prepared using dilution  
168 series of linearized cloned plasmid DNA. DNA was extracted as above using the non-  
169 destructive method, amplified and cloned into competent *Escherichia coli* cells using the  
170 TOPO TA cloning kit (Thermo-Fisher). DNA from successfully transformed colonies was  
171 extracted using “PureYield Plasmid Miniprep System” (Promega). For assay validation ITS2  
172 DNA was cloned from other psyllid species (see results section 3.1). Stock DNA 10 ng/μl was  
173 linearised from cloned plasmid DNA using EcoRI restrictions enzyme (New England Biolabs),  
174 0.5 μl of enzyme was added to 100 μl of stock DNA, this solution was incubated in a heat  
175 block (Thermomixer C, Eppendorf) at 37 °C for 15 mins. The enzyme was then deactivated at  
176 65 °C for 20mins. Real-time PCRs were performed in 15 μl volumes including: 6.75 μl  
177 Jumpstart Taq Ready Mix (Sigma); 1.2 μl MgCl<sub>2</sub> (25mM); 0.45 μl of each primer; 0.15 μl  
178 probe; 4 μl of molecular grade water (Sigma); and 2 μl of template DNA. The standard real-  
179 time PCR cycle program was as follows. Hold stage: 50 °C for 2 mins then; 95 °C for 10 mins.

180 PCR stage: 40 cycles of ( 95 °C for 15 secs; X °C for 1 min), with primer annealing  
181 temperature X being 58, 60, 62, 64, or 68; depending on the experiment. Primer  
182 concentration, MgCl<sub>2</sub> concentration and temperature was adjusted for validation and  
183 optimization of the assay as described below. Reactions were performed on a “QuantStudio  
184 6 Flex” (Applied Biosystems) real-time PCR machine and analysis was done on the  
185 “QuantStudio Real-Time PCR Software” (Applied Biosystems).

## 186 **2.5. Assay validation**

### 187 **2.5.1. Specificity**

188 The final primer and probe set was tested on genomic DNA from 47 *B. cockerelli* specimens  
189 from different life stages. These included the 4 US biotypes [17,54] and specimens from  
190 New Zealand to determine false negatives. The assay was tested for specificity against  
191 genomic DNA of 73 non-target psyllid species collected as mentioned above, to detect false  
192 positives. This included a total of 8 other closely related *Bactericera* spp. and the major  
193 vectors of Lso on Apiaceous crops (*B. nigricornis*, *B. trigonica* and *Trioza apicalis*).  
194 Information regarding samples tested is in results section 3.1. The assay was also checked  
195 for cross-reaction against potato genomic DNA (*Solanum tuberosum*), 3 samples of *S.*  
196 *tuberosum* ‘Maris Piper’ were tested in replicates of 8. All reactions with non-target DNA  
197 were run in conjunction with a TaqMan Exogenous Internal Positive Control Reagent Kit  
198 (Applied Biosystems) to rule out the possibility that false positives were not obtained due to  
199 inhibition within the reaction. DNA from all non-target psyllids was sequenced in either ITS2,  
200 CO1 or both to ensure psyllid DNA was present in all reactions to rule out false negatives  
201 due to inefficient DNA extraction. Reactions were performed in duplicate at least, with a  
202 higher number of replicates for species closely related to *B. cockerelli*. False positives were

203 defined as reactions with non-target DNA that showed fluorescence above the cycle  
204 threshold during 40 cycles; and false negatives were defined as reactions with *B. cockerelli*  
205 DNA that did not give a C<sub>t</sub> after 40 cycles.

### 206 **2.5.2. Sensitivity**

207 Experiments were performed to determine the limit of detection of the assays. DNA  
208 standards were produced using *B. cockerelli* linearized cloned DNA from the ITS2 region. A  
209 nine point 10-fold dilution series starting with 10 ng/μl DNA up to 10<sup>-8</sup> ng/μl of linearised  
210 plasmid DNA and genomic DNA was used to determine the limit of detection. 100ng/μl  
211 stock DNA concentration was initially checked using QuBit 4 Fluorometer (Invitrogen) and 5  
212 μl was added to 45 μl of molecular grade water (Sigma-Aldrich) to dilute 1:10; eight  
213 subsequent dilutions were made. Linearised and non-linearised DNA was compared along  
214 with genomic DNA. The ability of the assay to detect immatures and eggs was also tested.  
215 DNA from various instars of immatures was extracted using the non-destructive protocol  
216 described above. Batches of 1 egg, 5 eggs and 10 eggs were extracted using the DNeasy  
217 Blood & Tissue kit (Qiagen) and initially broken with a pestle.

### 218 **2.5.3. Repeatability and Reproducibility**

219 Variation in the performance of the assay between runs and within runs was assessed at a  
220 0.2 μM primer concentration, with 1.5mM MgCl<sub>2</sub>, and 60 °C annealing temperature.  
221 Linearised plasmid DNA from *Escherichia coli* transformed with *B. cockerelli* ITS2 DNA was  
222 used. A six point 1:10 dilution series starting at 10ng/μl was used with each dilution being  
223 performed in triplicate. The same experiment was repeated 3x simultaneously. Runs and  
224 variations between the three experiments were recorded and analysed using QuantStudio 6

225 Real-Time PCR Software. An identical plate following the same plate set-up and reaction mix  
226 was run simultaneously on another QuantStudio 6 real-time PCR machine to compare inter-  
227 run variation.

#### 228 **2.5.4. Robustness/Optimization**

229 Amplification of target DNA, specificity and sensitivity at different MgCl<sub>2</sub> concentration,  
230 primer concentrations and annealing temperatures were performed to assess robustness.  
231 The assay was tested with 1.5, 3.5, 5.5, 7.5 and 9.5mM MgCl<sub>2</sub> concentration. For primers,  
232 0.1, 0.2, 0.3, 0.5 and 1.0 μM concentrations were tested. The assay was also tested at  
233 different annealing temperatures 58, 60, 62, 64, 68 °C across. For each tested parameter,  
234 optimization was performed across a nine point 1:10 dilution series starting at 10ng/μl DNA.  
235 All samples were tested in triplicates. Closely related *Bactericera* species were included in  
236 these assays to assess specificity under different assay conditions. After optimization of the  
237 assay a multifactorial robustness test was performed across two different real-time PCR  
238 machines to test the combined effects of small changes/errors in the PCR set-up. The assays  
239 were run on a “QuantStudio 6 Flex” (Applied Biosystems) and “CFX96 Real-Time System”  
240 (BioRad); results were analysed using “QuantStudio 6 Real-Time PCR Software” (Applied  
241 Biosystems) and “CFX Manager 3.1” (BioRad). The methodology used followed the European  
242 Network of GMO Laboratories (ENGL) recommendations [55].

### 243 **3. RESULTS**

#### 244 **3.1. DNA extraction, PCR, and DNA sequencing for identification of psyllids**

245 DNA from 110 psyllid specimens comprising 73 different species were extracted, amplified  
246 and sequenced successfully from either CO1 or ITS2 gene regions, or both (Tab. 1).

| Family             | Genus                | Species              | Voucher ID          | Collection Location | Collection method             | CO1 Ac#          | ITS2 Ac# | Tech Reprs | Voucher Location |   |
|--------------------|----------------------|----------------------|---------------------|---------------------|-------------------------------|------------------|----------|------------|------------------|---|
| Aphalaridae        | <i>Aphalara</i>      | <i>avicularis</i>    | 160718.A.avi.23     | Wellesbourne, UK    | suction trap                  | MT021761         | /        | 2          | 1                |   |
|                    |                      | <i>polygoni</i>      | 160718.A.pol.22     | Wellesbourne, UK    | suction trap                  | /                | MT038907 | 2          | 1                |   |
|                    | <i>Blastopsylla</i>  | <i>occidentalis</i>  | 180312.Bl.occ.24    | Salamanca, Spain    | suction trap                  | MN272146         | MN316692 | 2          | 3                |   |
|                    |                      | <i>Craspedolepta</i> | <i>gutierreziae</i> | 160825.5 US         | Nevada, USA                   | field collection | MT021786 | MT038962   | 2                | 1 |
|                    | <i>minutissima</i>   |                      | 160825.1 US         | Nevada, USA         | field collection              | MT021787         | MT038963 | 2          | 1                |   |
|                    |                      |                      | 160825.10 US        | Oregon, USA         | field collection              | MT021789         | /        | 2          | 1                |   |
|                    |                      |                      | 160825.4 US         | Nevada, USA         | field collection              | MT021788         | /        | 2          | 1                |   |
|                    |                      |                      | 160728.Cra.ner.2    | Gogarbank, UK       | suction trap                  | MT021790         | MT038964 | 2          | 1                |   |
|                    |                      |                      | 160825.2 US         | Nevada, USA         | field collection              | /                | MT038965 | 2          | 1                |   |
|                    |                      |                      | <i>subpunctata</i>  | 160421.C.sub.5      | Gogarbank, UK                 | suction trap     | MT021791 | MT038966   | 2                | 1 |
|                    | <i>Rhinocola</i>     |                      | <i>aceris</i>       | 151014.R.ace.14     | Wellesbourne, UK              | suction trap     | MT021810 | MT038979   | 2                | 2 |
|                    | Liviidae             | <i>Diaphorina</i>    | <i>citri</i>        | 160309.D.cit.6      | Lab Colony,                   | Lab Reared       | MT021794 | MT038969   | 2                | 1 |
| <i>Euphyllura</i>  |                      | <i>olivina</i>       | 180125.Eup.oli.3    | imports from Italy  | imported <i>Olea europaea</i> | MT021797         | MT038970 | 2          | 3                |   |
|                    |                      | <i>crefeldensis</i>  | 180312.L.cre.5      | Salamanca, Spain    | suction trap                  | MN316678         | MN272127 | 2          | 3                |   |
| <i>Livia</i>       |                      | <i>junci</i>         | 160404.L.jun.1      | Broom' s Barn, UK   | suction trap                  | MT021801         | /        | 2          | 2                |   |
|                    |                      | <i>opaqua</i>        | 160825.6 US         | Nevada, USA         | field collection              | MT021802         | MT038973 | 2          | 1                |   |
| Psyllidae          | <i>Arytaina</i>      | <i>genistae</i>      | 151203.A.gen.2J     | Ayr, UK             | suction trap                  | /                | MT038909 | 2          | 1                |   |
|                    | <i>Arytainilla</i>   | <i>gredi</i>         | 180312.A.gre.1      | Salamanca, Spain    | suction trap                  | MN272123         | MN316677 | 2          | 3                |   |
|                    |                      | <i>spartiophila</i>  | 180716.A.spa.29     | Edinburgh, UK       | suction trap                  | MT021762         | MT038908 | 2          | 3                |   |
|                    |                      | <i>foersteri</i>     | 151203.B.foe.1J     | Ayr, UK             | suction trap                  | /                | MT038944 | 2          | 1                |   |
|                    | <i>Baeopelma</i>     | <i>foersteri</i>     | 160928.B.foe.2      | SASA, UK            | suction trap                  | MT021776         | /        | 2          | 1                |   |
|                    |                      | <i>Cacopsylla</i>    | <i>affinis</i>      | 151203.C.aff.1      | Wye, UK                       | suction trap     | MT021777 | MT038945   | 2                | 2 |
|                    | <i>ambigua</i>       |                      | 160404.C.amb.4      | Wye, UK             | suction trap                  | /                | MT038946 | 2          | 2                |   |
|                    | <i>ambigua</i>       |                      | 161024.C.amb.3      | Preston, UK         | suction trap                  | /                | MT038947 | 2          | 1                |   |
|                    | <i>americana</i>     |                      | 160825.3 US         | Nevada, USA         | field collection              | MT021778         | MT038948 | 2          | 1                |   |
|                    | <i>brunneipennis</i> |                      | 160309.C.bru.8      | Wye, UK             | suction trap                  | /                | MT038949 | 2          | 2                |   |
|                    | <i>crataegi</i>      |                      | 160404.C.cra.3      | Broom' s Barn, UK   | suction trap                  | MT021779         | MT038950 | 2          | 2                |   |
|                    | <i>mali</i>          |                      | 180910.C.mal.30     | Elcho, UK           | field collection              | /                | MT038951 | 2          | 3                |   |
|                    | <i>melanoneura</i>   |                      | 160718.C.mel.6      | Kirton, UK          | suction trap                  | /                | MT038952 | 2          | 3                |   |
|                    | <i>moscovita</i>     |                      | 190109.C.mos.1      | Germany             | suction trap                  | /                | /        | 2          | 3                |   |
|                    | <i>peregrina</i>     |                      | 161024.C.per.11     | Silwood Park, UK    | suction trap                  | MT021780         | MT038953 | 2          | 1                |   |
|                    | <i>pruni</i>         |                      | 160203.C.pru.18     | Wellesbourne, UK    | suction trap                  | /                | MT038954 | 2          | 2                |   |
|                    | <i>pulchra</i>       |                      | 160718.C.pul.15     | Elgin, UK           | suction trap                  | /                | MT038955 | 2          | 1                |   |
|                    | <i>pyricola</i>      |                      | 160203.C.pco.2      | Wye, UK             | suction trap                  | MT021781         | MT038956 | 2          | 2                |   |
|                    | <i>saliceti</i>      |                      | 161024.C.sal.7      | York, UK            | suction trap                  | /                | MT038958 | 2          | 1                |   |
|                    | <i>sorbi</i>         |                      | 161024.C.sor.8      | Preston, UK         | suction trap                  | MT021782         | MT038959 | 2          | 1                |   |
|                    | <i>rhamnicola</i>    |                      | 151014.C.rha.8      | Wellesbourne, UK    | suction trap                  | /                | MT038957 | 2          | 2                |   |
|                    | <i>ulmi</i>          | 171011.C.ulm.13      | Germany             | suction trap        | MT021783                      | MT038960         | 2        | 3          |                  |   |
|                    | <i>Ceanothia</i>     | <i>ceanothi</i>      | 160825.9 US         | Oregon, USA         | field collection              | MT021784         | /        | 2          | 1                |   |
|                    | <i>Chamaepsylla</i>  | <i>hartigii</i>      | 160728.Ch.har.1     | Gogarbank, UK       | suction trap                  | MT021785         | MT038961 | 2          | 1                |   |
|                    | <i>Euglyptoneura</i> | <i>fuscipennis</i>   | 160825.7 US         | Oregon, USA         | field collection              | MT021795         | /        | 2          | 1                |   |
|                    |                      | <i>robusta</i>       | 160825.8 US         | Oregon, USA         | field collection              | MT021796         | /        | 2          | 1                |   |
|                    | <i>Heteropsylla</i>  | <i>texana</i>        | 160825.11 US        | Texas, USA          | field collection              | MT021798         | /        | 2          | 1                |   |
|                    | <i>Psylla</i>        | <i>alni</i>          | 161019.P.aln.1      | Sweden              | suction trap                  | MT021804         | /        | 2          | 1                |   |
|                    |                      | <i>buxi</i>          | 180622.P.bux.22     | Scotland, UK        | suction trap                  | MT021806         | MT038976 | 2          | 3                |   |
|                    | <i>Psyllopsis</i>    | <i>betulae</i>       | 161123.P.bet.20     | Jokioinen, Finland  | suction trap                  | MT021805         | MT038975 | 2          | 3                |   |
|                    |                      | <i>discrepans</i>    | 151002.P.dis.8      | Sweden              | suction trap                  | MT021807         | /        | 2          | 1                |   |
|                    |                      | <i>fraxini</i>       | 180716.P.fri.33     | Edinburgh, UK       | suction trap                  | MT021808         | MT038977 | 2          | 3                |   |
|                    |                      | <i>fraxinicola</i>   | 160203.P.fra.6      | Wellesbourne, UK    | suction trap                  | MT021809         | MT038978 | 2          | 2                |   |
| <i>Spanioneura</i> |                      | <i>fonscolombii</i>  | 180802.S.fon.29     | Edinburgh, UK       | field collection              | /                | MT038980 | 2          | 3                |   |
| Spondylaspididae   | <i>Ctenarytaina</i>  | <i>spatulata</i>     | 160404.Ct.spa.6     | Wye, UK             | suction trap                  | MT021792         | MT038967 | 2          | 2                |   |
|                    |                      | <i>spatulata</i>     | 161024.Ct.spa.5     | Wye, UK             | suction trap                  | MT021793         | MT038968 | 2          | 1                |   |
| Triozidae          | <i>Bactericera</i>   | <i>albiventris</i>   | 171214.B.alb.11     | Jokioinen, Finland  | suction trap                  | /                | MT038910 | 5          | 3                |   |
|                    |                      | <i>curvatinervis</i> | 161123.B.cur.42     | Jokioinen, Finland  | suction trap                  | /                | MT038911 | 5          | 3                |   |
|                    |                      | <i>dorsalis</i>      | 160803.B.dor.2      | Florida, USA        | lab colony                    | MT021763         | MT038912 | 5          | 3                |   |
|                    |                      | <i>maculipennis</i>  | 190604.B.mac.1      | Lab Colony, USA     | Lab Reared                    | /                | MT038913 | 2          | 3                |   |
|                    |                      |                      | 190604.B.mac.2      | Lab Colony, USA     | Lab Reared                    | /                | MT038914 | 2          | 3                |   |
|                    |                      |                      | 190604.B.mac.3      | Lab Colony, USA     | Lab Reared                    | /                | MT038915 | 2          | 3                |   |
|                    |                      |                      | 190604.B.mac.4      | Lab Colony, USA     | Lab Reared                    | /                | MT038916 | 2          | 3                |   |
|                    |                      |                      | 190604.B.mac.5      | Lab Colony, USA     | Lab Reared                    | /                | MT038917 | 2          | 3                |   |
|                    |                      |                      | 190604.B.mac.6      | Lab Colony, USA     | Lab Reared                    | /                | MT038918 | 2          | 3                |   |
|                    |                      |                      | 190604.B.mac.7      | Lab Colony, USA     | Lab Reared                    | /                | MT038919 | 2          | 3                |   |
|                    |                      | <i>nigricornis</i>   | 170324.B.nig.18     | Spain               | field collection              | MT021764         | MT038920 | 5          | 3                |   |
|                    |                      |                      | 170324.B.nig.22     | Spain               | field collection              | MT021765         | MT038921 | 5          | 3                |   |
|                    |                      | <i>salicivora</i>    | 190116.B.sal.1      | Elgin, UK           | suction trap                  | /                | /        | 6          | 3                |   |
| <i>striola</i>     | 161123.B.str.9       | Jokioinen, Finland   | suction trap        | /                   | MT038922                      |                  |          |            |                  |   |
| <i>tremblayi</i>   | 170731.B.tre.5       | Belgrade, Serbia     | field collection    | /                   | MT038923                      | 5                | 3        |            |                  |   |

|                     |                      |                 |                    |                  |          |          |   |   |
|---------------------|----------------------|-----------------|--------------------|------------------|----------|----------|---|---|
|                     |                      | 190604.B.tre.17 | Spain              | Lab Colony       | /        | MT038924 | 2 | 3 |
|                     |                      | 190604.B.tre.18 | Spain              | Lab Colony       | /        | MT038925 | 2 | 3 |
|                     |                      | 190604.B.tre.19 | Spain              | Lab Colony       | /        | MT038926 | 2 | 3 |
|                     |                      | 190604.B.tre.20 | Spain              | Lab Colony       | /        | MT038927 | 2 | 3 |
|                     |                      | 190604.B.tre.21 | Spain              | Lab Colony       | /        | MT038928 | 2 | 3 |
|                     | <i>trigonica</i>     | 170629.B.tri.16 | Tunisia            | field collection | MT021766 | MT038929 | 3 | 3 |
|                     |                      | 170629.B.tri.17 | Tunisia            | field collection | /        | MT038930 | 3 | 3 |
|                     |                      | 170629.B.tri.18 | Tunisia            | field collection | MT021767 | MT038931 | 3 | 3 |
|                     |                      | 181010.B.tri.17 | Spain              | Lab Colony       | MT021768 | MT038932 | 2 | 3 |
|                     |                      | 181010.B.tri.18 | Spain              | Lab Colony       | MT021769 | MT038933 | 2 | 3 |
|                     |                      | 181010.B.tri.19 | Spain              | Lab Colony       | /        | MT038934 | 2 | 3 |
|                     |                      | 181010.B.tri.20 | Spain              | Lab Colony       | MT021770 | MT038935 | 2 | 3 |
|                     |                      | 181010.B.tri.21 | Spain              | Lab Colony       | /        | MT038936 | 2 | 3 |
|                     |                      | 190604.B.tri.23 | Spain              | Lab Colony       | MT021771 | MT038937 | 2 | 3 |
|                     |                      | 190604.B.tri.24 | Spain              | Lab Colony       | /        | MT038938 | 2 | 3 |
|                     |                      | 190604.B.tri.25 | Spain              | Lab Colony       | MT021772 | MT038939 | 2 | 3 |
|                     |                      | 190604.B.tri.26 | Spain              | Lab Colony       | MT021773 | MT038940 | 2 | 3 |
|                     |                      | 190604.B.tri.27 | Spain              | Lab Colony       | MT021774 | MT038941 | 2 | 3 |
|                     |                      | 190604.B.tri.28 | Spain              | Lab Colony       | /        | MT038942 | 2 | 3 |
|                     |                      | 190604.B.tri.29 | Spain              | Lab Colony       | MT021775 | MT038943 | 2 | 3 |
| <i>Heterotrioza</i> | <i>chenopodii</i>    | 160203.H.che.11 | Kirton, UK         | suction trap     | /        | MT038971 | 2 | 2 |
|                     |                      | 160825.12 US    | Washington, USA    | field collection | MT021799 | /        | 2 | 1 |
| <i>Lauritrioza</i>  | <i>alacris</i>       | 160816.L.ala.2  | Spain              | suction trap     | MT021800 | MT038972 | 2 | 1 |
| <i>Powellia</i>     | <i>vitreoradiata</i> | 161024.P.vit.10 | Kirton, UK         | suction trap     | MT021803 | MT038974 | 2 | 1 |
| <i>Trioza</i>       | <i>albifrons</i>     | 160825.18 US    | Nevada, USA        | field collection | MT021811 | MT038981 | 2 | 1 |
|                     | <i>anthrisci</i>     | 150708.T.ant.11 | Jokioinen, Finland | field collection | MT021812 | /        | 2 | 3 |
|                     | <i>apicalis</i>      | 161019.T.api.5  | Sweden             | field collection | MT021813 | /        | 2 | 3 |
|                     | <i>buxtoni</i>       | 170324.T.bux.11 | Israel             | field collection | MT021814 | MT038982 | 2 | 3 |
|                     | <i>centranthi</i>    | 161024.T.cen.9  | Wye, UK            | suction trap     | MT021815 | /        | 2 | 1 |
|                     | <i>cerastii</i>      | 171214.T.cer.32 | Vikki, Finland     | suction trap     | MT021816 | MT038983 | 2 | 3 |
|                     | <i>dispar</i>        | 160718.T.dis.26 | Hellfreda, Sweden  | suction trap     | MT021817 | /        | 2 | 1 |
|                     | <i>erytraeae</i>     | 160808.ICA.19   | Spain              | Lab Colony       | /        | MT038984 | 2 | 1 |
|                     | <i>flavipennis</i>   | 160421.T fla.3  | Sweden             | suction trap     | MT021818 | MT038985 | 2 | 1 |
|                     | <i>galii</i>         | 160203.T.gal.23 | Wellesbourne, UK   | suction trap     | /        | MT038986 | 2 | 2 |
|                     | <i>remota</i>        | 160718.T.rem.8  | Sweden             | suction trap     | /        | MT038987 | 2 | 1 |
|                     |                      | 180424.T.rem.1  | Dundee, UK         | Suction trap     | MT021819 | MT038988 | 3 | 3 |
|                     |                      | 180424.T.rem.6  | Dundee, UK         | Suction trap     | MT021820 | MT038989 | 3 | 3 |
|                     |                      | 180424.T.rem.16 | Dundee, UK         | Suction trap     | MT021821 | MT038990 | 3 | 3 |
|                     |                      | 180424.T.rem.18 | Dundee, UK         | Suction trap     | MT021822 | MT038991 | 3 | 3 |
|                     |                      | 180424.T.rem.19 | Dundee, UK         | Suction trap     | /        | MT038992 | 3 | 3 |
|                     |                      | 190116.T.rem.7  | UK                 | Suction trap     | MT021823 | MT038993 | 3 | 3 |
|                     | <i>rhamnii</i>       | 151002.T.rha.13 | Sweden             | suction trap     | MT021824 | MT038994 | 2 | 1 |
|                     | <i>tatrensis</i>     | 160718.T.tat.27 | Sweden             | suction trap     | /        | MT038995 | 2 | 1 |
|                     | <i>urticae</i>       | 160816.T.urt.17 | Spain              | field collection | /        | MT038996 | 2 | 1 |

247 **Table 1:** Information on non-target psyllid species and plant specimens tested using the *B.*  
248 *cockerelli* real-time PCR assay Bcoc\_JSK2 showing number of technical replicates and false  
249 positives. All non-target species gave 0% false positives. GenBank Accession numbers are  
250 included for ITS2 and CO1 regions if sequencing was successful. Voucher Location: 1= 1; 2= 2  
251 Research Insect Survey; 3= SASA Hemipteran DNA Database. All DNA samples are stored in  
252 the SASA Hemipteran DNA database. “/” = no sequence obtained

### 253 **3.2. Bioinformatics and Real-Time PCR Assay Design.**

254 While differentiation within both the ITS2 and CO1 gene regions was sufficient to  
255 discriminate between psyllid species, the ITS2 gene region was more suitable for TaqMan

256 assay design for *B. cockerelli*. Similarities between CO1 gene sequences between members  
 257 of the *Bactericera* genus and *B. cockerelli* were higher than in the ITS2 region (average %  
 258 similarity =  $82.51 \pm 0.68$  for CO1 and  $77.80 \pm 4.79$  for ITS2) (Tab. 2). The ITS2 region showed  
 259 larger sections of variability along the gene on which to design primers and probes. Several  
 260 primer and probe sets passed the selection criteria, but most were unsuitable due to high  
 261 rate of false positives from closely related *Bactericera* species. The final primer and probe  
 262 set Bcoc\_JSK2 (Tab. 3) targets a 187bp region of the ITS2 gene (Fig. 1).

| Species                 | ITS2         |     |              | CO1          |     |              |
|-------------------------|--------------|-----|--------------|--------------|-----|--------------|
|                         | % Similarity | bp  | GC content % | % Similarity | bp  | GC content % |
| <i>B. trigonica</i>     | 78.96        | 662 | 59.3         | 82.88        | 509 | 35.4         |
| <i>B. tremblayi</i>     | 79.16        | 665 | 59.1         | 82.97        | 682 | 33           |
| <i>B. curvatinervis</i> | 80.30        | 655 | 58           | 82.23        | 678 | 34.7         |
| <i>B. nigricornis</i>   | 81.16        | 668 | 59.3         | 81.28        | 521 | 36.7         |
| <i>B. albiventris</i>   | 76.67        | 667 | 59.2         | 83.41        | 663 | 32.9         |
| <i>B. dorsalis</i>      | 65.59        | 560 | 61.3         | 82.31        | 685 | 32.6         |
| <i>B. maculipennis</i>  | 80.67        | 674 | 61.6         | nd           | nd  | nd           |
| <i>B. salicivora</i>    | nd           | nd  | nd           | nd           | nd  | nd           |
| <i>B. striola</i>       | 79.91        | 663 | 59.1         | nd           | nd  | nd           |
| <i>B.cockerelli</i>     | N/A          | 569 | 61.0         | N/A          | 595 | 32.6         |



263 **Table 2.** Closely related Bactericera species tested with Bcoc\_JSK2 assay. ITS similarity = %  
 264 identity to DNA sample 150727.B.coc.02. CO1 similarity = % identity to a consensus  
 265 sequences of all *B. cockerelli* sequences obtained during this study. CO1 genes showed  
 266 higher similarity and fewer variable regions compared to ITS2 regions. Highest % similarity  
 267 to *B. cockerelli* in the ITS2 region was found in *B. nigricornis* (81.16) and to *B. albiventris* in  
 268 the CO1 region (83.41). The Bcoc\_JSK2 assay does not give false positives with any of the  
 269 species listed here. (nd= not determined due to sequencing failing).

| Oligo Name  | Function        | Sequence 5'-3'           | Tm   | Length (bp) |
|-------------|-----------------|--------------------------|------|-------------|
| Bcoc_JSK2-f | forward primer  | GAGGTCTCCTCATCGTGCGT     | 61   | 25          |
| Bcoc_JSK2-r | reverse primer  | GGACGAGCATTGCTGCTGC      | 62.2 | 23          |
| Bcoc_JSK2-p | probe (FAM-BHQ) | GCAAACGCGGCACAAGTACCGCGC | 70.9 | 25          |

270 **Table 3.** Final oligonucleotide sequences for the Bcoc\_JSK2 TaqMan real-time PCR assay to  
 271 identify *B. cockerelli*. The assay targets a 187 bp region of the ITS2 gene region.

| Sample name     | Life Stage | Origin             | C <sub>t</sub> ave | Tech reps | CO1 Ac#  | ITS2 Ac# | DNA Source |
|-----------------|------------|--------------------|--------------------|-----------|----------|----------|------------|
| 181119.B.coc.06 | 1 egg      | Mexico             | 29.80              | 2         | /        | MT027568 | Genomic    |
| 191003.B.coc.01 | 1 egg      | Mexico             | 33.41              | 3         | /        | MT027592 | Genomic    |
| 191003.B.coc.02 | 1 egg      | Mexico             | 24.95              | 3         | /        | MT027593 | Genomic    |
| 191003.B.coc.03 | 1 egg      | Mexico             | 33.79              | 3         | /        | MT027594 | Genomic    |
| 191003.B.coc.04 | 1 egg      | Mexico             | 22.43              | 6         | /        | MT027595 | Genomic    |
| 181119.B.coc.07 | 5 eggs     | Mexico             | 24.42              | 2         | /        | MT027569 | Genomic    |
| 181119.B.coc.21 | 5 eggs     | Mexico             | 28.32              | 2         | /        | MT027582 | Genomic    |
| 181119.B.coc.08 | 10 eggs    | Mexico             | 29.61              | 2         | /        | MT027570 | Genomic    |
| 181119.B.coc.22 | 10 eggs    | Mexico             | 26.43              | 2         | /        | MT027583 | Genomic    |
| 181119.B.coc.03 | immature   | Mexico             | 22.56              | 2         | /        | MT027565 | Genomic    |
| 181119.B.coc.04 | immature   | Mexico             | 22.33              | 2         | /        | MT027566 | Genomic    |
| 181119.B.coc.05 | immature   | Mexico             | 21.46              | 2         | /        | MT027567 | Genomic    |
| 181119.B.coc.11 | immature   | Mexico             | 23.16              | 2         | /        | MT027573 | Genomic    |
| 181119.B.coc.12 | immature   | Mexico             | 24.15              | 2         | /        | MT027574 | Genomic    |
| 181119.B.coc.13 | immature   | Mexico             | 23.94              | 2         | /        | MT027575 | Genomic    |
| 181119.B.coc.14 | immature   | Mexico             | 25.75              | 2         | /        | MT027576 | Genomic    |
| 181119.B.coc.16 | immature   | Mexico             | 23.49              | 2         | /        | MT027578 | Genomic    |
| 181119.B.coc.18 | immature   | Mexico             | 22.45              | 2         | /        | MT027580 | Genomic    |
| 181119.B.coc.19 | immature   | Mexico             | 23.50              | 2         | /        | MT027581 | Genomic    |
| 190604.B.coc.13 | immature   | Mexico             | 24.96              | 2         | /        | MT027588 | Genomic    |
| 190604.B.coc.14 | immature   | Mexico             | 25.09              | 2         | /        | MT027589 | Genomic    |
| 190604.B.coc.15 | immature   | Mexico             | 28.37              | 2         | /        | MT027590 | Genomic    |
| 150727.B.coc.02 | Adult      | South Western, USA | 22.18              | 2         | MT040955 | MG719775 | Genomic    |
| 150827.B.coc.02 | Adult      | South Western, USA | 22.18              | 2         | MT040956 | MT027597 | Genomic    |
| 150827.B.coc.03 | Adult      | Central USA        | 24.49              | 6         | MT040957 | MT027598 | Genomic    |
| 150827.B.coc.04 | Adult      | North Western, USA | 24.77              | 2         | MT040958 | MT027599 | Genomic    |
| 150827.B.coc.06 | Adult      | North Western, USA | 23.68              | 2         | MT040960 | MT027552 | Genomic    |
| 150827.B.coc.12 | Adult      | Western, USA       | 20.39              | 2         | MT040961 | MT027596 | Genomic    |
| 150827.B.coc.17 | Adult      | South Western, USA | 19.65              | 2         | MT040962 | MT027553 | Genomic    |
| 160725.B.coc.05 | Adult      | Central, USA       | 21.45              | 2         | MT040963 | /        | Genomic    |
| 160726.B.coc.01 | Adult      | New Zealand        | 21.56              | 2         | /        | MT027557 | Genomic    |
| 160726.B.coc.02 | Adult      | New Zealand        | 21.02              | 2         | /        | MT027558 | Genomic    |
| 160726.B.coc.03 | Adult      | New Zealand        | 20.48              | 2         | /        | MT027559 | Genomic    |
| 160726.B.coc.04 | Adult      | New Zealand        | 21.98              | 2         | /        | MT027560 | Genomic    |
| 160726.B.coc.05 | Adult      | New Zealand        | 19.43              | 2         | /        | MT027561 | Genomic    |
| 160726.B.coc.06 | Adult      | New Zealand        | 20.96              | 2         | /        | MT027562 | Genomic    |
| 180731.B.coc.04 | Adult      | North Western, USA | 24.42              | 6         | MT040964 | /        | Genomic    |
| 180731.B.coc.05 | Adult      | Western, USA       | 22.91              | 6         | MT040965 | /        | Genomic    |
| 180731.B.coc.06 | Adult      | Western, USA       | 27.14              | 6         | MT040966 | /        | Genomic    |
| 181119.B.coc.01 | Adult      | Mexico             | 21.47              | 2         | /        | MT027563 | Genomic    |
| 181119.B.coc.02 | Adult      | Mexico             | 19.98              | 2         | /        | MT027564 | Genomic    |
| 181119.B.coc.09 | Adult      | Mexico             | 21.83              | 2         | /        | MT027571 | Genomic    |
| 181119.B.coc.10 | Adult      | Mexico             | 19.48              | 2         | /        | MT027572 | Genomic    |

|                        |                            |                  |       |   |          |          |              |
|------------------------|----------------------------|------------------|-------|---|----------|----------|--------------|
| 181119.B.coc.15        | Adult                      | Mexico           | 21.27 | 2 | /        | MT027577 | Genomic      |
| 181119.B.coc.17        | Adult                      | Mexico           | 23.74 | 2 | /        | MT027579 | Genomic      |
| 190604.B.coc.09        | Adult                      | USDA, Lab Colony | 21.51 | 2 | /        | MT027584 | Genomic      |
| 190604.B.coc.10        | Adult                      | Mexico           | 20.33 | 2 | /        | MT027585 | Genomic      |
| 190604.B.coc.11        | Adult                      | Mexico           | 22.67 | 2 | /        | MT027586 | Genomic      |
| 190604.B.coc.12        | Adult                      | Mexico           | 24.37 | 2 | /        | MT027587 | Genomic      |
| 190604.B.coc.16        | Adult                      | Mexico           | 27.15 | 2 | /        | MT027591 | Genomic      |
| 150827.B.coc.05.col.04 | transformed <i>E. coli</i> | Lab              | 11.23 | 6 | MT040959 | MT027551 | Cloned, 10ng |
| 160725.B.coc.01.col.06 | transformed <i>E. coli</i> | Lab              | 11.55 | 6 | /        | MT027554 | Cloned, 10ng |
| 160725.B.coc.06.col.04 | transformed <i>E. coli</i> | Lab              | 11.78 | 6 | /        | MT027555 | Cloned, 10ng |
| 160725.B.coc.07.col.08 | transformed <i>E. coli</i> | Lab              | 11.67 | 6 | /        | MT027556 | Cloned, 10ng |

272

273 **Table 4:** Information on *Bactericera cockerelli* samples tested with Bcoc\_JSK2 assay  
 274 including genomic DNA from adults, immatures, single eggs and egg batches. Location of  
 275 samples collection is also included. All samples gave 100% positives. Accession numbers for  
 276 CO1 and ITS2 (MT027551-MT027599) regions are included. "/" = no sequence obtained.

277 **Figure 1.** CLUSTAL-W alignment of ITS2 regions from closely related *Bactericera* species  
 278 showing variable regions and the gene target for the Bcoc\_JSK2 primer and probe set. Bases  
 279 shades with black show differences to *B. cockerelli* sequence. Colour highlights locations of  
 280 forward primer (blue highlight); reverse primer (green highlight) and probe (yellow  
 281 highlight). The probe and reverse primer are reverse compliments of the highlighted regions  
 282 here.

### 283 **3.3. Specificity and Sensitivity**

284 This assay did not amplify DNA from any of the 73 non-target psyllid species or *Solanum*  
 285 *tuberosum* DNA when tested at 60 °C with primer concentration 0.2 µM. Samples included  
 286 nine closely related *Bactericera* species with similar ITS2 and CO1 sequences (Tab. 2). Under  
 287 optimal conditions, false negatives = 0% for all non-target species tested with pure genomic  
 288 DNA, giving a diagnostic specificity of 100%. Some suboptimal reaction conditions showed  
 289 33% false positives against high concentrations (10 ng / 1 ng) of *Bactericera albiventris*  
 290 cloned DNA (see below). All *B. cockerelli* genomic DNA samples gave positive results (Tab. 4)  
 291 giving 0% false negatives across 54 biological replicates and 147 technical replicates;

292 resulting in a diagnostic sensitivity of 100%. These included *B. cockerelli* specimens from  
293 each of the four US biotypes as well as specimens from New Zealand. These specimens  
294 included adults, immature stages and eggs. The assay can amplify *B. cockerelli* DNA from  
295 both cloned and genomic samples. Under optimal conditions for PCR efficiency and  
296 specificity (60 °C, 0.2 µM primer, 1.5 mM MgCl<sub>2</sub>) the limit of detection was 0.000001 ng DNA  
297 across a range of different reaction parameters this equates to 200 copy numbers of ITS2  
298 calculated using the following equation: Number of Copies = (ng DNA x 6.022x10<sup>23</sup>) ÷ (length  
299 of plasmid (4656) + cloned fragment (700)bp) \* 1x10<sup>9</sup> \* 660). The copy number calculator  
300 available at <http://scienceprimer.com/copy-number-calculator-for-realtime-pcr> was used.  
301 Diagnostic sensitivity was 100% on all DNA extracted from *B. cockerelli* immatures. False  
302 negatives from DNA from egg extractions were 0% for single eggs and 0% for batches of 3  
303 and 10 eggs.

#### 304 **3.4. Repeatability and Reproducibility**

305 No significant differences were found between C<sub>t</sub> means across the different replicates at  
306 different concentrations as tested by two-way ANOVA ( $F_{5, 25} = 0.54$ ,  $p = 0.955$ ). The assay  
307 also performed consistently across different machines and there was no significant  
308 difference between runs across the two machines as tested by two-way ANOVA ( $F_{1, 5} = 1.28$ ,  
309  $p = 0.279$ ).

#### 310 **3.5. Robustness/Optimization**

311 The assays amplified *B. cockerelli* DNA at all primer concentrations, MgCl<sub>2</sub> concentrations  
312 and annealing temperatures with varying levels of efficiency, precision, and sensitivity (Supp  
313 Tabs. S1-S3). At primer concentration 0.5 µM, the assay was less sensitive only amplifying

314 down to 0.0001 ng DNA. At higher primer concentrations (1.0  $\mu$ M,) the assay showed higher  
315 sensitivity, but efficiency was outside the range for acceptable use. The assay performed  
316 optimally at 0.2  $\mu$ M primer concentration showing good efficiency and high sensitivity  
317 (0.000001 ng DNA) (Supp Tab. S1). Generally, standard deviation of the  $C_t$  was lower at  
318 higher DNA concentrations and some of the primer concentrations showed SD slightly  
319 above the accepted level for quantitative real-time PCR, however this module is intended  
320 for qualitative use. At high DNA concentrations all primer concentrations are suitable for  
321 use with Bcoc\_JSK2 primer and probe set to detect *B. cockerelli* but 0.2  $\mu$ M is recommended  
322 for best results. The assay did not amplify non-target DNA from the 8 other *Bactericera*  
323 species tested at the different primer concentrations (0.1, 0.2, 0.3, 0.5 and 1.0  $\mu$ M).

324 The MgCl<sub>2</sub> concentration of the assay made only small differences to the overall  
325 performance of the assay (Supp Tab. S2) and the assay was able to amplify *B. cockerelli* DNA  
326 at low concentrations (0.000001 ng) at each MgCl<sub>2</sub> concentration. The precision of the assay  
327 was lower at higher MgCl<sub>2</sub> concentrations 7.5mM and 9.5mM (Supp Tab. S2).

328 Sensitivity was slightly higher at 64 °C giving 33.33% (n=3) positives for only 20 copies of *B.*  
329 *cockerelli* DNA (0.0000001 ng), however at 64 °C and 66 °C 33.33% (n=3) false positives were  
330 found with 10ng and 1 ng of *B. albiventris* cloned DNA (Supp Tab. S3). Reactions at 58 °C  
331 were 10 to 100-fold less sensitive than reactions at 64 °C. For best sensitivity and specificity,  
332 it is suggested that assays using the Bcoc\_JSK2 primer and probe set should be performed at  
333 60 °C or 62 °C. While higher temperatures appear to be more sensitive, they are not  
334 recommended on unknown samples due to the small likelihood of returning false positives  
335 with *B. albiventris* and possibly other un-tested *Bactericera* spp.

336 It is recommended that this assay be performed at 60 °C – 62 °C, with a MgCl<sub>2</sub> concentration  
337 of 1.5mM and a primer concentration of 0.2 μM. To test the robustness of these conditions  
338 a multifactorial approach was taken [55]. The assay performed satisfactorily across the  
339 different treatments and was shown to be robust and unaffected by small changes in assay  
340 set-up (Supp Tab. S4). Each treatment gave 100% positives for amplification of *B. cockerelli*  
341 genomic DNA.

#### 342 **4. Discussion**

343 The Tomato-Potato psyllid is an economically damaging pest of solanaceous plants that has  
344 spread by human mediated dispersal. It causes feeding damage to plants but also is the  
345 major vector of ‘*Candidatus Liberibacter solanacearum*’ (Lso), a phloem limited bacterium  
346 that is associated with disease in solanaceous and apiaceous plants. Management of this  
347 insect pest requires accurate identification of *B. cockerelli*, this is often difficult if eggs or  
348 immature life stages only are available for identification. Hitherto, identification of *B.*  
349 *cockerelli* required either considerable expertise in psyllid taxonomy or the lengthy process  
350 of DNA barcoding [54].

351 We have designed and validated the first species-specific, quantitative real-time PCR  
352 TaqMan assay for *B. cockerelli* by using the comparison of 73 non-target species to identify  
353 unique gene regions that were suitable for primer/probe design and species differentiation.  
354 The genus *Bactericera* currently contains 160 species [20] and <1% of these have been  
355 tested in the current study due to the difficulty in obtaining other specimens from the field  
356 or lab colonies. However Europe is home to 26 different species of *Bactericera* [20], 30% of  
357 which have been tested for false positives using this assay. Psyllid species that were tested

358 are most commonly found in potato and carrot fields in Europe and the wider EPPO region  
359 which should minimize the potential for false positives and ensure the assay is efficient at  
360 detecting outbreaks in European fields. The assay was also tested on nine closely related  
361 *Bactericera* species. The number of species used in our study is relatively high compared to  
362 other reported TaqMan assays for plant pests that report lower numbers of non-target  
363 species [56,57].

364 The assay is based on a 187 bp region of the ITS2 gene which was suitable as it contained  
365 high interspecific variation consisting of stretches of insertions and deletions (INDELs). The  
366 ITS2 region has been used to distinguish species phylogenetically and to identify cryptic  
367 species in the *Cacopsylla pruni* complex [47]. DNA sequences obtained from this study will  
368 improve psyllid representation on online DNA databases, reducing the chance of Type II  
369 errors (i.e. misidentification due to lack of conspecific references) [58]. The *B. cockerelli*  
370 sequences on which we tested this assay (and many of the non-target psyllid species) were  
371 from different geographic locations to account for intraspecific variation. *Bactericera*  
372 *cockerelli* specimens from the four USA biotypes and specimens from New Zealand all gave  
373 100% true positives.

374 The success rates of eradications are dependent on the length of time between  
375 introduction, detection, and implementation of eradication measures as Lso displays a short  
376 transmission time from *B. cockerelli* to potatoes [4,25]. Feasibly, methodology described in  
377 this study could be used to extract DNA from a specimen and test for *B. cockerelli* positives  
378 within 6-12 hrs or quicker. This is faster than identification by DNA barcoding and could aid  
379 in eradications/ prevention of incursions. This time could be reduced further if the real-time  
380 assay is used in conjunction with faster DNA extraction protocols.

381 There are currently no methods described within the EPPO “agreed diagnostic protocol for  
382 identification of *B. cockerelli*” [4]. In addition, the current EPPO control system for *B.*  
383 *cockerelli* and Lso [4] highlights the importance of identifying psyllid eggs and immatures on  
384 various plant materials during inspections and monitoring but gives minimal guidelines for  
385 achieving this. Validation of this assay demonstrates that it would be a reliable and accurate  
386 tool for use in this area and it will therefore be prepared for consideration by the EPPO  
387 diagnostic panel. This assay is also useful for monitoring *B. cockerelli* occurrence at several  
388 spatial scales, from local border checks to regional surveys which use different trapping  
389 methods (water, sticky, suction, aerial balloon traps) where no host plant data is available.  
390 Given the sensitivity of this assay it should be possible to detect *B. cockerelli* DNA from  
391 insect fragments (e.g. legs, heads) if DNA extraction is adequate. However, further  
392 validation should be performed to ensure the assay performs adequately on samples  
393 obtained from different traps. This assay should be tested on additional congeneric species  
394 and other closely related Triozidae psyllids. Another limitation of this assay is that it cannot  
395 yet be taken out into the field, making it less portable than LAMP assays or other NGS  
396 sequencing techniques such as Nanopore technology.

397 In conclusion a rapid, specific, robust, repeatable and reliable real-time PCR assay has now  
398 been validated and can be used to detect the important pest *B. cockerelli*. This will be an  
399 important tool for providing much-needed support to prevent new outbreaks. The assay can  
400 be implemented by practitioners with molecular biology experience and does not require  
401 personnel to have classical taxonomic knowledge of insects or psyllids; making this tool  
402 more accessible than traditional methods. The assay can be used to complement field  
403 surveillance and may facilitate further ecological studies of *B. cockerelli* requiring the

404 identification of immatures and eggs. The strength of this assay lies in the collaboration of  
405 molecular biologists and classical taxonomists working together to build a reliable database  
406 for DNA barcoding of psyllids.

## 407 **6. Funding**

408 This work was supported by the EU Horizon2020 Programme under grant agreement No.  
409 635646, POnTE (Pest Organisms Threatening Europe) and the Scottish Government  
410 [RRL/001/14]. The Rothamsted Insect Survey, a National Capability, is funded by the  
411 Biotechnology and Biological Sciences Research Council under the Core Capability Grant  
412 BBS/E/C/000J0200. The authors declare there is no conflict of interest regarding the  
413 publishing of this article.

## 414 **7. Acknowledgements**

415 We thank A. Fereres & C. A. Antolínez Delgado (Institute of Agricultural Sciences, CSIC,  
416 Spain), A. Nissinen (Natural Resources Institute Finland), J. Munyaneza, R. Cooper, M. Heidt,  
417 K. Swisher Grimm (USDA Agricultural Research Services), S. Bulman (Plant and Food  
418 Research, New Zealand), A. Jensen, S. Halbert (Florida Department of Agriculture &  
419 Consumer Services, Dept. of Plant Industry) and Alberto Flores (Universidad Autónoma  
420 Agraria Antonio Narro) for specimens; and thank C. Jeffries, L. Webster, V. Mulholland, and  
421 A. Reid (SASA) for providing advice. We also thank SASA Potato Genotyping team for  
422 providing Potato DNA.

## 423 **8. Author Contributions**



424 **JS-K:** assay design and validation, investigation, performed analysis, collected data,  
425 bioinformatics, visualization, writing- original draft, supervision, project administration;  
426 **MJS:** assay design and validation, investigation, performed analysis, collected data,  
427 bioinformatics, visualization, writing- original draft, supervision, project administration; **YA:**  
428 investigation, performed analysis, validation, data curation, collected data; **MC:** provided  
429 resources, data analysis, curation of data, investigation, taxonomy expertise; **FH:** conceived  
430 the project, methodology, supervision, writing- original draft; **DO:** provided resources, data  
431 analysis, curation of data, taxonomy expertise, writing – review and edit; **AG:** provided  
432 resources, data analysis, taxonomy expertise, writing- review and edit; **JB:** conceived the  
433 project, provided resources, methodology, writing- review and edit, supervision, project  
434 administration; **RS:** provided resources, data analysis, methodology; **DK:** conceived the  
435 project, conceptualization, funding acquisition, methodology, supervision, project  
436 administration.

## 437 9. References

- 438 1. Munyaneza JE, Sengoda VG, Crosslin JM, Garzon-Tiznado JA, Cardenas-Valenzuela  
439 OG. First report of "*Candidatus Liberibacter solanacearum*" in tomato plants in  
440 Mexico. Plant Dis. 2009;93: 1076. doi:10.1094/PDIS-93-10-1076A
- 441 2. Wallis RL. Ecological studies on the Potato Psyllid as a pest of potatoes. USDA Tech  
442 Bull. 1955;1107: 25.
- 443 3. Hansen AK, Trumble JT, Stouthamer R, Paine TD. A new huanglongbing species,  
444 "*Candidatus Liberibacter psyllauros*," found to infect tomato and potato, is vectored  
445 by the psyllid *Bactericera cockerelli* (Sulc). Appl Environ Microbiol. 2008;74: 5862–  
446 5865. doi:10.1128/AEM.01268-08
- 447 4. EPPO. PM 9/25 (1) *Bactericera cockerelli* and '*Candidatus Liberibacter solanacearum*.'  
448 EPPO Bull. 2017;47: 513–523. doi:10.1111/epp.12442

- 449 5. Liefiting LW, Perez-Egusquiza ZC, Clover GRG, Anderson JAD. A new '*Candidatus*  
450 *Liberibacter*' species in *Solanum tuberosum* in New Zealand. *Plant Dis.* 2008;92:  
451 1474–1474. doi:10.1094/pdis-92-10-1474a
- 452 6. Liefiting LW, Sutherland PW, Ward LI, Paice KL, Weir BS, Clover GRG. A new  
453 '*Candidatus Liberibacter*' species associated with diseases of solanaceous crops. *Plant*  
454 *Dis.* 2009;93: 208–214. doi:10.1094/PDIS-93-3-0208
- 455 7. Munyaneza JE. Zebra Chip disease of potato: Biology, epidemiology, and  
456 management. *Am J Potato Res.* 2012;89: 329–350. doi:10.1007/s12230-012-9262-3
- 457 8. Crosslin JM, Hamm PB, Eggers JE, Rondon SI, Sengoda VG, Munyaneza JE. First report  
458 of Zebra Chip disease and "*Candidatus Liberibacter solanacearum*" on potatoes in  
459 Oregon and Washington State. *Plant Dis.* 2012;96: 452. doi:10.1094/PDIS-10-11-0894
- 460 9. Kaur N, Cooper WR, Durringer JM, Badillo-Vargas IE, Esparza-Díaz G, Rashed A, et al.  
461 Survival and development of Potato Psyllid (Hemiptera: Triozidae) on Convolvulaceae:  
462 Effects of a plant-fungus symbiosis (*Periglandula*). *PLoS One.* 2018;13: 1–19.  
463 doi:10.1371/journal.pone.0201506
- 464 10. Knowlton G, Thomas W. Host plants of the Potato Psyllid. *J Econ Entomol.* 1934;27:  
465 547.
- 466 11. Pletsch D. The Potato Psyllid *Paratrioza cockerelli* (Sulc), its biology and control. *Bull*  
467 *Mont Agric Exp Stn.* 1947;446: 1–95.
- 468 12. Wallis RL. Potato Psyllid selection of host plants. *J Econ Entomol.* 1951;44: 815–817.  
469 doi:10.1093/jee/44.5.815

- 470 13. Butler CD, Trumble JT. The Potato Psyllid, *Bactericera cockerelli* (Sulc) (Hemiptera:  
471 Triozidae): life history, relationship to plant diseases, and management strategies.  
472 Terr Arthropod Rev. 2012;5: 87–111. doi:10.1163/187498312X634266
- 473 14. Prager SM, Esquivel I, Trumble JT. Factors influencing host plant choice and larval  
474 performance in *Bactericera cockerelli*. PLoS One. 2014;9.  
475 doi:10.1371/journal.pone.0094047
- 476 15. Martin NA. Host plants of the Potato / Tomato Psyllid : A cautionary tale. Weta.  
477 2008;35: 12–16.
- 478 16. Cooper WR, Horton DR, Miliczky E, Wohleb CH, Waters TD. The weed link in Zebra  
479 Chip epidemiology: suitability of non-crop Solanaceae and Convolvulaceae to Potato  
480 Psyllid and “*Candidatus Liberibacter solanacearum*.” Am J Potato Res. 2019; 262–271.  
481 doi:10.1007/s12230-019-09712-z
- 482 17. Swisher KD, Henne DC, Crosslin JM. Identification of a fourth haplotype of *Bactericera*  
483 *cockerelli* (Hemiptera: Triozidae) in the United States. J Insect Sci. 2014;14: 1–7.  
484 doi:10.1093/jisesa/ieu023
- 485 18. Swisher KD, Munyaneza JE, Crosslin JM. High resolution melting analysis of the  
486 Cytochrome Oxidase I gene identifies three haplotypes of the Potato Psyllid in the  
487 United States. Environ Entomol. 2012;41: 1019–1028. doi:10.1603/EN12066
- 488 19. Swisher KD, Sengoda VG, Dixon J, Echegaray E, Murphy AF, Rondon SI, et al.  
489 Haplotypes of the potato psyllid, *Bactericera cockerelli*, on the wild host plant,  
490 *Solanum dulcamara*, in the Pacific Northwestern United States. Am J Potato Res.  
491 2013;90: 570–577. doi:10.1007/s12230-013-9330-3

- 492 20. Ouvrard D. 2018 Psyllist - The World Psylloidea Database. 2019. Available:  
493 <http://www.hemiptera-databases.com/psyllist>
- 494 21. Teulon DA., Workman PJ, Thomas KL, Nielsen MC. *Bactericera cockerelli*: Incursion,  
495 dispersal and current distribution on vegetable crops in New Zealand. New Zeal Plant  
496 Prot. 2009;62: 136–144.
- 497 22. Australian Government Department of Agriculture and Water Resources. Detection of  
498 *Bactericera cockerelli* (Tomato-potato psyllid) in Western Australia. Canberra; 2017.  
499 Available:  
500 [https://www.ippc.int/en/countries/australia/pestreports/2017/02/detection-of-](https://www.ippc.int/en/countries/australia/pestreports/2017/02/detection-of-bactericera-cockerelli-tomato-potato-psyllid-in-western-australia/)  
501 [bactericera-cockerelli-tomato-potato-psyllid-in-western-australia/](https://www.ippc.int/en/countries/australia/pestreports/2017/02/detection-of-bactericera-cockerelli-tomato-potato-psyllid-in-western-australia/)
- 502 23. Munyaneza JE, Crosslin JM, Upton JE. Association of *Bactericera cockerelli*  
503 (Homoptera: Psyllidae) with “Zebra Chip” a New Potato Disease in Southwestern  
504 United States and Mexico. J Econ Entomol. 2007;100: 656–663. doi:10.1603/0022-  
505 0493(2007)100[656:AQBCHP]2.0.CO;2
- 506 24. Munyaneza JE, Fisher TW, Sengoda VG, Garczynski SF, Nissinen A, Lemmetty A.  
507 Association of “*Candidatus Liberibacter solanacearum*” with the psyllid, *Triozia*  
508 *apicalis* (Hemiptera: Triozidae) in Europe. J Econ Entomol. 2010;103: 1060–1070.  
509 doi:10.1603/EC10027
- 510 25. Munyaneza JE, Sengoda VG, Stegmark R, Arvidsson AK, Anderbrant O, Yuvaraj JK, et  
511 al. First report of “*Candidatus Liberibacter solanacearum*” associated with psyllid-  
512 affected carrots in Sweden. Plant Dis. 2012;96: 453–453. doi:10.1094/PDIS-10-11-  
513 0871

- 514 26. Liefting LW, Weir BS, Pennycook SR, Clover GRG. "*Candidatus Liberibacter*  
515 *solanacearum*", associated with plants in the family Solanaceae. Int J Syst Evol  
516 Microbiol. 2009;59: 2274–2276. doi:10.1099/ijs.0.007377-0
- 517 27. Bextine B, Aguilar E, Rueda A, Caceres O, Sengoda VG, McCue KF, et al. First report of  
518 "*Candidatus Liberibacter solanacearum*" on tomato in El Salvador. Plant Dis. 2013;97:  
519 1245. doi:10.1094/PDIS-03-13-0248-PDN
- 520 28. Munyaneza JE, Sengoda VG, Aguilar E, Bextine B, McCue KF. First report of  
521 "*Candidatus Liberibacter solanacearum*" on pepper in Honduras. Plant Dis. 2014;98:  
522 154. doi:10.1094/PDIS-06-13-0598-PDN
- 523 29. Munyaneza JE, Sengoda VG, Aguilar E, Bextine BR, McCue KF. First report of  
524 "*Candidatus Liberibacter solanacearum*" infecting eggplant in Honduras. Plant Dis.  
525 2013;97: 1654. doi:10.1094/PDIS-06-13-0641-PDN
- 526 30. Aguilar E, Sengoda VG, Bextine B, McCue KF, Munyaneza JE. First report of  
527 "*Candidatus Liberibacter solanacearum*" on tobacco in Honduras. Plant Dis. 2013;97:  
528 1376. doi:10.1094/PDIS-04-13-0453-PDN
- 529 31. Munyaneza JE, Sengoda VG, Aguilar E, Bextine B, McCue KF. First report of  
530 "*Candidatus Liberibacter solanacearum*" associated with psyllid-infested tobacco in  
531 Nicaragua. Plant Dis. 2013;97: 1244. doi:10.1094/PDIS-03-13-0247-PDN
- 532 32. Johnson D. Canadian Potato Psyllid and Zebra Chip Monitoring Network Report. News  
533 Lett Can Potato Psyllid Zebra Chip Monit Netw. 2017; 1–19. doi:10.15713/ins.mmj.3
- 534 33. Castillo Carrillo C, Fu Z, Burckhardt D. First record of the Tomato Potato Psyllid

- 535 *Bactericera cockerelli* from South America. Bull Insectology. 2019;72: 85–91.
- 536 34. Swisher Grimm KD, Garczynski SF. Identification of a new haplotype of ‘*Candidatus*  
537 *Liberibacter solanacearum*’ in *Solanum tuberosum*. Plant Dis. 2019;103: 468–474.  
538 doi:10.1094/PDIS-06-18-0937-RE
- 539 35. Nelson WR, Fisher TW, Munyaneza JE. Haplotypes of “*Candidatus Liberibacter*  
540 *solanacearum*” suggest long-standing separation. Eur J Plant Pathol. 2011;130: 5–12.  
541 doi:10.1007/s10658-010-9737-3
- 542 36. Wen A, Mallik I, Alvarado VY, Pasche JS, Wang X, Li W, et al. Detection, distribution,  
543 and genetic variability of ‘*Candidatus Liberibacter*’ species associated with zebra  
544 complex disease of potato in North America. Plant Dis. 2009;93: 1102–1115.  
545 doi:10.1094/pdis-93-11-1102
- 546 37. Borges KM, Cooper WR, Garczynski SF, Thinakaran J, Jensen AS, Horton DR, et al.  
547 “*Candidatus Liberibacter solanacearum*” associated with the psyllid, *Bactericera*  
548 *maculipennis* (Hemiptera: Trioizidae). Environ Entomol. 2017;46: 210–216.  
549 doi:10.1093/ee/nvw174
- 550 38. CNAS. Economic Impacts of Zebra Chip on the Texas Potato Industry. Texas; 2006.
- 551 39. Greenway G, Rondon SI. Economic impacts of Zebra Chip in Idaho, Oregon, and  
552 Washington. Am J Potato Res. 2018;95: 362–367.
- 553 40. Soliman T. Economic impact assessment of invasive plant pests in the European  
554 Union. Wageningen University, Wageningen, Netherlands. 2012.
- 555 41. DEFRA. Pest Alert :*Bactericera cockerelli*. 2017. Available:

556 [https://planthealthportal.defra.gov.uk/ph-](https://planthealthportal.defra.gov.uk/ph-api/pests/27077/notices/6682/documents/4183/document)  
557 [api/pests/27077/notices/6682/documents/4183/document](https://planthealthportal.defra.gov.uk/ph-api/pests/27077/notices/6682/documents/4183/document)

558 42. EPPO. *Bactericera cockerelli*. EPPO Bull. 2013;43: 202–208. doi:10.1111/epp.12044

559 43. Burckhardt D, Ouvrard D. A revised classification of the jumping plant-lice  
560 (Hemiptera: Psylloidea). Zootaxa. 2012;34: 1–34.

561 44. Bell JR, Alderson L, Izera D, Kruger T, Parker S, Pickup J, et al. Long-term phenological  
562 trends, species accumulation rates, aphid traits and climate: Five decades of change  
563 in migrating aphids. J Anim Ecol. 2015;84: 21–34. doi:10.1111/1365-2656.12282

564 45. Sjolund MJ, Ouvrard D, Kenyon D, Hight F. Developing an RT-PCR assay for the  
565 identification of psyllid species. Proc Crop Prot North Britain. 2016; 279–282.

566 46. Percy DM. Radiation, diversity, and host-plant interactions among island and  
567 continental legume-feeding psyllids. Evolution (N Y). 2003;57: 2540–2556.  
568 doi:10.1111/j.0014-3820.2003.tb01498.x

569 47. Peccoud J, Labonne G, Sauvion N. Molecular test to assign individuals within the  
570 *Cacopsylla pruni* complex. PLoS One. 2013;8: 1–8. doi:10.1371/journal.pone.0072454

571 48. EPPO. PM 7/129 (1) DNA barcoding as an identification tool for a number of regulated  
572 pests. EPPO Bull. 2016;46: 501–537. doi:10.1111/epp.12344

573 49. Thompson JD, Higgins DG, Gibson TJ. CLUSTAL W: Improving the sensitivity of  
574 progressive multiple sequence alignment through sequence weighting, position-  
575 specific gap penalties and weight matrix choice. Nucleic Acids Res. 1994;22: 4673–  
576 4680. doi:10.1093/nar/22.22.4673

- 577 50. Altschul SF, Gish W, Miller W, Myers EW, Lipman DJ. Basic local alignment search tool.  
578 J Mol Biol. 1990;215: 403–410. doi:[https://doi.org/10.1016/S0022-2836\(05\)80360-2](https://doi.org/10.1016/S0022-2836(05)80360-2)
- 579 51. Clark K, Karsch-Mizrachi I, Lipman DJ, Ostell J, Sayers EW. GenBank. Nucleic Acids Res.  
580 2015/11/20. 2016;44: D67–D72. doi:10.1093/nar/gkv1276
- 581 52. Untergasser A, Cutcutache I, Koressaar T, Ye J, Faircloth B, Remm M, et al. Primer3--  
582 new capabilities and interfaces. Nucleic Acids Res. 2012;40: e115. Available:  
583 <http://www.ncbi.nlm.nih.gov/pmc/articles/PMC3424584/>
- 584 53. Ye J, Coulouris G, Zaretskaya I, Cutcutache I, Rozen S, Madden T. Primer-BLAST: A tool  
585 to design target-specific primers for polymerase chain reaction. BMC Bioinformatics.  
586 2012;13: 134.
- 587 54. Liu D, Trumble JT, Stouthamer R. Genetic differentiation between eastern populations  
588 and recent introductions of Potato Psyllid (*Bactericera cockerelli*) into western North  
589 America. Entomol Exp Appl. 2006;118: 177–183. doi:10.1111/j.1570-  
590 7458.2006.00383.x
- 591 55. European Network of GMO Laboratories. Definition of minimum performance  
592 requirements for analytical methods of GMO testing. 2015. doi:10.2788/65827
- 593 56. Li D, Fan Q-H, Waite DW, Gunawardana D, George S, Kumarasinghe L. Development  
594 and validation of a Real-Time PCR assay for rapid detection of Two-Spotted Spider  
595 Mite, *Tetranychus urticae* (Acari: Tetranychidae). PLoS One. 2015;10: e0131887.  
596 doi:10.1371/journal.pone.0131887
- 597 57. Dhama MK, Dsouza M, Waite DW, Anderson D, Li D. Real-Time PCR assay for the



598 identification of the Brown Marmorated Stink Bug (*Halyomorpha halys*). Front Mol  
599 Biosci. 2016;3: 1–6. doi:10.3389/fmolb.2016.00005

600 58. Virgilio M, Jordaens K, Breman FC, Backeljau T, de Meyer M. Identifying insects with  
601 incomplete DNA barcode libraries, African fruit flies (Diptera: Tephritidae) as a test  
602 case. PLoS One. 2012;7. doi:10.1371/journal.pone.0031581

## 603 **10. Supporting Information Captions**

604 **Supplementary Table 1.** Assay performance across a range of primer concentrations at 60  
605 °C and 1.5mM MgCl<sub>2</sub>. Optimum primer concentration was 0.2 μM showing the best  
606 combination of r<sup>2</sup>, slope, efficiency, and sensitivity.

607 **Supplementary Table 2.** Performance of *B. cockerelli* real-time PCR assay at different  
608 magnesium chloride (MgCl<sub>2</sub>) concentrations.

609 **Supplementary Table 3.** Summary of standard curves from optimisation of temperature on  
610 Bcoc\_JSK2 real-time PCR assay for identification of *B. cockerelli*. All DNA concentrations  
611 tested above the limit of detection (10ng, 1 ng, 0.1ng, 0.01ng 0.001ng, 0.0001ng, 0.00001ng,  
612 0.000001ng) gave 100% positives across 3 x replicates. LOD is given for each temperature.  
613 All non-target Bactericera species tested at different DNA concentration gave 0% false  
614 positives except for *B. albiventris* cloned DNA which cross reacted at 64 and 66 °C.  
615 (\*reactions at 64 °C gave 33.33% positives at 20 copy numbers).

616 **Supplementary Table 4.** Set-up and results of multifactorial robustness experiment testing  
617 the Bcoc\_JSK2 assay on *B. cockerelli* genomic DNA. All treatments showed 100% positives  
618 despite small changes to the overall set-up.

619

620

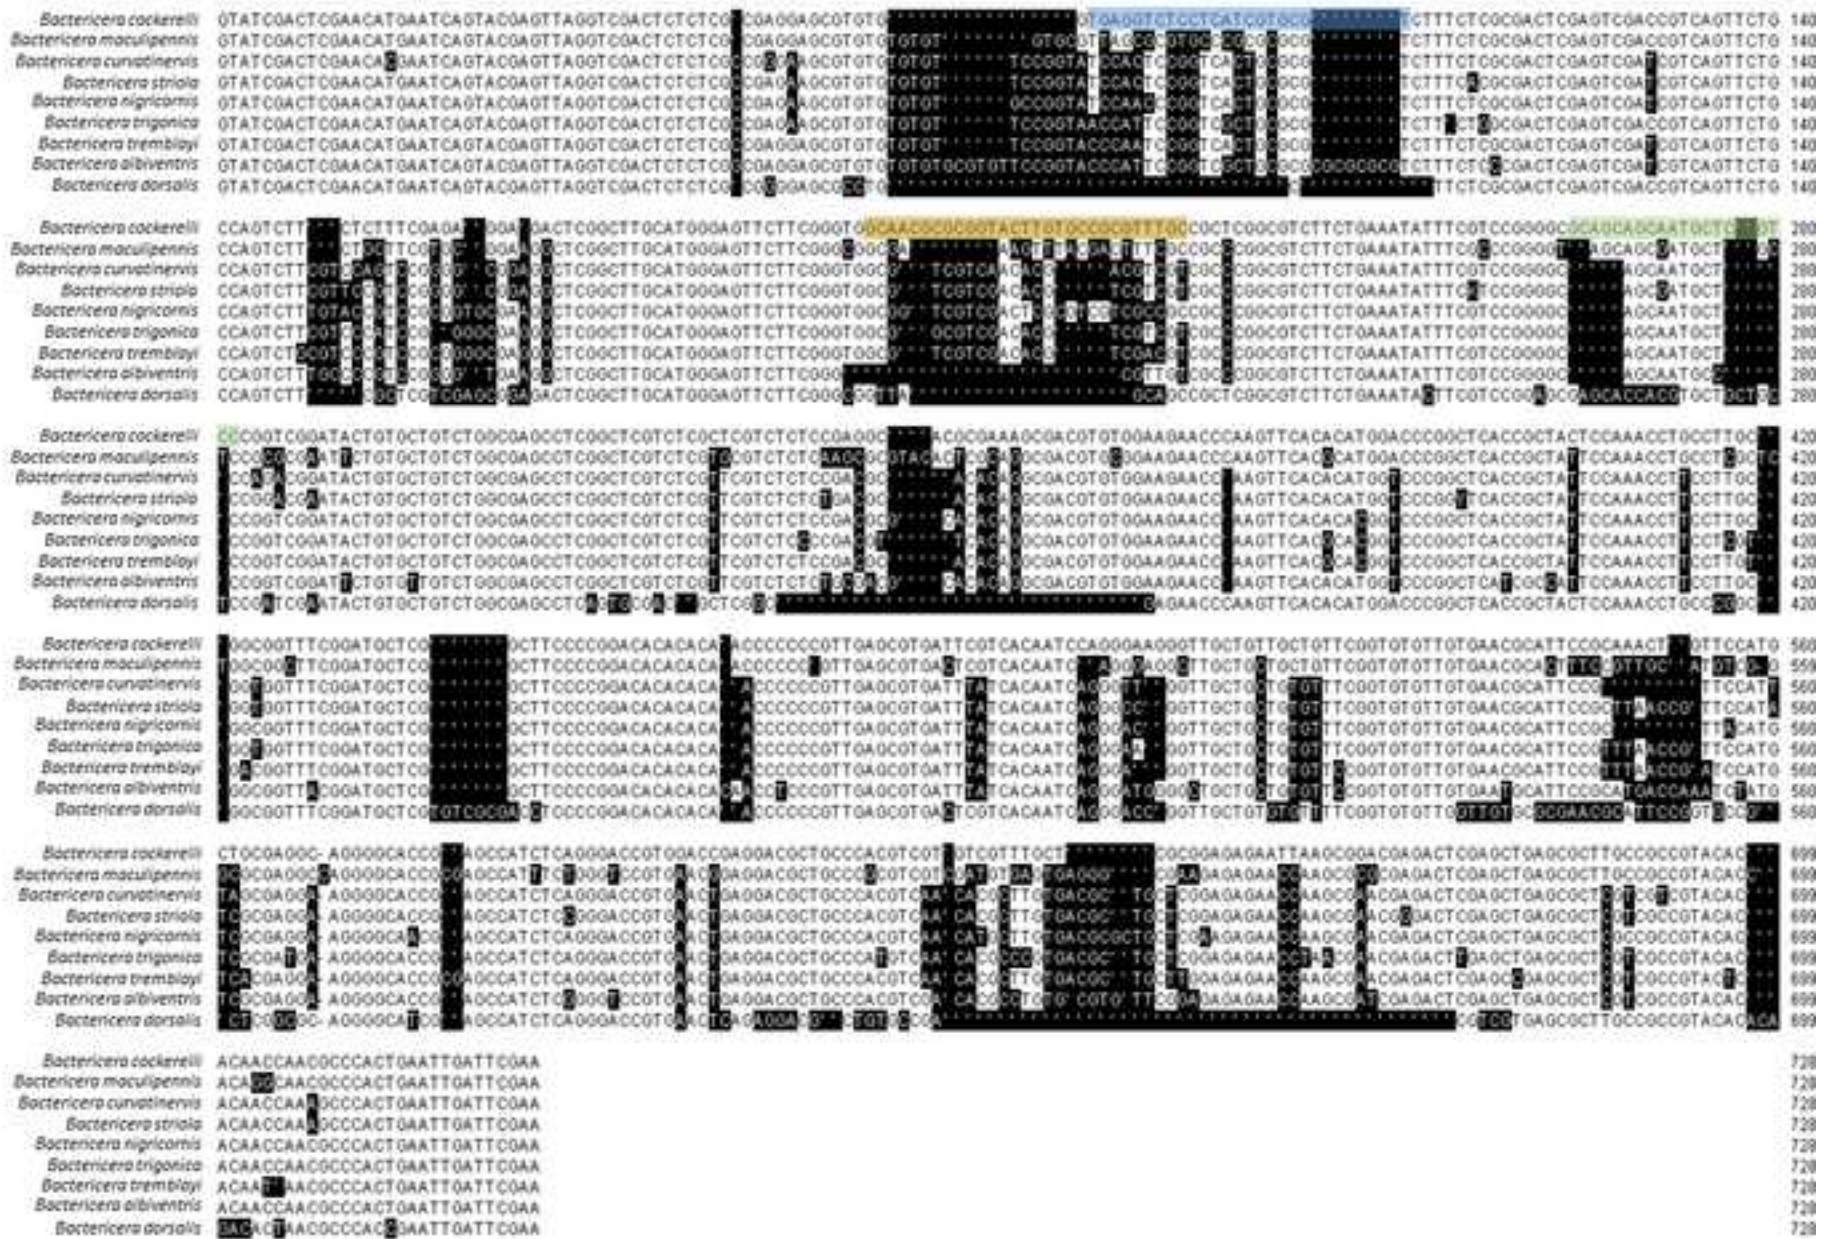

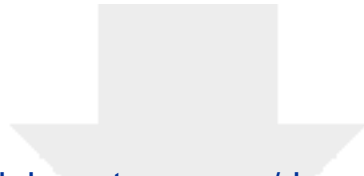

Click here to access/download  
**Supporting Information**  
Sup Tab S1.docx

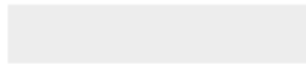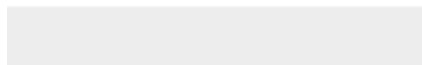



Click here to access/download  
**Supporting Information**  
Sup Tab S2.docx

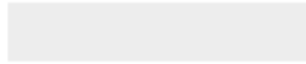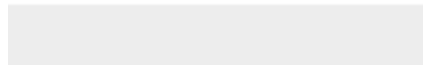



Click here to access/download  
**Supporting Information**  
Sup Tab S3.docx

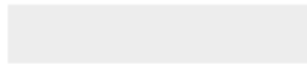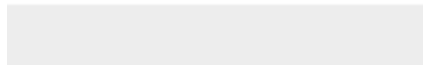



Click here to access/download  
**Supporting Information**  
Sup Tab S4.docx

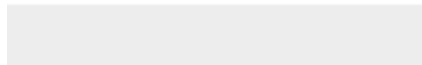

1 ***Full Title:*** A diagnostic real-time PCR assay for the rapid identification of the tomato-potato  
2 psyllid, *Bactericera cockerelli* (Šulc, 1909) and development of a psyllid barcoding database.

3 ***Authors***

4 JC Sumner-Kalkun<sup>1\*</sup>, MJ Sjölund<sup>1</sup>, YM Arnsdorf<sup>1</sup>, M Carnegie<sup>1</sup>, F Highet<sup>1</sup>, D Ouvrard<sup>2-5</sup>, AFC  
5 Greenslade<sup>3</sup>, JR Bell<sup>3</sup>, R Sigvald<sup>4</sup>, DM Kenyon<sup>1</sup>

6 <sup>1</sup>SASA, Roddinglaw Road, Edinburgh EH12 9FJ, UK. <sup>2</sup>Department of Life Sciences, Natural  
7 History Museum, Cromwell Road, London SW7 5BD, UK. <sup>3</sup>Rothamsted Insect Survey,  
8 Rothamsted Research, West Common, Harpenden, Hertfordshire, AL5 2JQ, UK. <sup>4</sup>

9 Department of Ecology, Swedish University of Agricultural Sciences, Box 7044 750 07

10 Uppsala, Sweden. <sup>5</sup>[Entomology and invasive plants Unit, Plant Health Laboratory, ANSES,](#)

11 [755 avenue du campus Agropolis, CS 30016, 34988 Montferrier-sur-Lez Cedex, France](#)

12 \*Corresponding author: jason.sumner-kalkun@sasa.gov.scot

13 ***Short Title:*** *Bactericera cockerelli* diagnostic assay

14 ***Keywords:*** *Bactericera cockerelli*, Biosecurity, Phytosanitary, Diagnostic, Pest, Vector,  
15 ‘*Candidatus Liberibacter solanacearum*’, real-time PCR

16

17

18

19

20

21 **Abstract**

22 The accurate and rapid identification of many insect pests is an important step in the  
23 prevention and control of outbreaks in areas that are otherwise pest free. The potato-  
24 tomato psyllid *Bactericera cockerelli* (Šulc, 1909) is the main vector of 'Candidatus  
25 Liberibacter solanacearum' on potato and tomato crops in Central and Northern America  
26 and New Zealand. This study describes the design and validation of the first species-specific  
27 TaqMan probe-based real-time PCR assay, targeting the ITS2 gene region of *B. cockerelli*.  
28 The assay successfully detected *B. cockerelli* genomic DNA from adults (100% accuracy,  
29 n=72); immatures (100% accuracy, n=26) and eggs (100% accuracy, n=25). This assay also  
30 detected DNA from cloned plasmids containing the ITS2 region of *B. cockerelli* (100%  
31 accuracy, n=24). The assay showed 0% false positives when tested on genomic and cloned  
32 DNA from 73 other psyllid species collected from across Europe, New Zealand and Mexico.  
33 This included 8 other species in the *Bactericera* genus and the main vectors of 'Candidatus  
34 Liberibacter solanacearum' worldwide. ~~The assay can amplify *B. cockerelli* DNA across a  
35 range of MgCl<sub>2</sub> concentrations (1.5, 3.5, 5.5, 7.5, 9.5 μM), primer concentrations  
36 (0.1, 0.2, 0.3, 0.5, 1.0 μM) and annealing temperatures (58, 60, 62, 64, 66, 68 °C).~~ The limit of  
37 detection for this assay at optimum conditions was 0.000001ng DNA (~200 copies) of ITS2  
38 DNA which equates to around a 1:10000 dilution of DNA from one single adult specimen. ~~No  
39 significant differences were found between 6 x repeats of a 1:10 dilution series with 7 points  
40 when tested by two-way ANOVA ( $F_{5, 25} = 0.54, p = 0.955$ ); two independent runs of  
41 experiments on two separate real-time PCR machines also showed no significant differences  
42 when tested by two-way ANOVA ( $F_{1, 5} = 1.28, p = 0.279$ ).~~ This assay is the first real-time PCR



43 based method for accurate, robust, sensitive and specific identification of *B. cockerelli* from  
44 all life stages. It can be used as a surveillance and monitoring tool to further study this  
45 important crop pest and to aid the prevention of outbreaks, or to prevent their spread after  
46 establishment in new areas.

#### 47 **1. Introduction**

48 The psyllid *Bactericera cockerelli* (Šulc, 1909), (commonly known as “Potato Psyllids” or  
49 “Tomato-Potato Psyllid”), is a major pest of cultivated Solanaceous crops including potato  
50 and tomato [1]. ~~The feeding by~~of this psyllid causes severe damage to potato plants  
51 including: deformed tubers; production of numerous small, poor quality tubers; curling of  
52 leaves and petioles; and yellowing or purpling of leaves. This leads to stunted growth and  
53 loss of yield [2]. *Bactericera cockerelli* is also the main vector of ‘*Candidatus Liberibacter*  
54 *solanacearum*’ (Lso) which is associated with Zebra Chip ~~and psyllid yellows~~ in Central and  
55 North America and New Zealand [3–8].

56 While *B. cockerelli* prefers to complete its life cycle on Solanaceous plants it ~~is also able to~~  
57 ~~reproduce on~~can also complete development on species of Convolvulaceae (Bindweeds and  
58 Morning Glories) [9]. ~~There may also be an association with *B. cockerelli* and plants in the~~  
59 ~~Lamiaceae (mints and deadnettles) but this is based on incidental observations from~~  
60 ~~glasshouses with high *B. cockerelli* infection [10].~~ In addition, adult *B. cockerelli* have been  
61 found on over 40 species belonging to 20 families, however most of these are either casual,  
62 food or shelter plants on which the psyllid is unable to complete a full life cycle ~~and/or~~  
63 ~~transmit Lso~~ [2,10–16]. Four biotypes of *B. cockerelli* have been described according to  
64 polymorphisms in the mitochondrial cytochrome *c oxidase subunit I* (COI) gene and  
65 represent geographically distinct populations; central, western, north-western, and south-

66 western [17,18]. ~~Evidence suggest that these genetic types may~~ ~~These populations have~~  
67 ~~been observed to~~ differ in their ability to spread Lso [18,19].

68 *Bactericera cockerelli* is thought to originate from South-Western USA and Mexico [2,11]  
69 and from here has spread via natural and human-mediated dispersal to extend its range  
70 [20]. ~~Outside America in Northern and Central America and to Oceania where~~ it is now  
71 established in New Zealand [21] and more recently Western Australia [22]. ~~In Central~~  
72 ~~America, *B. cockerelli* has been found as far south as Nicaragua [23] but has not currently~~  
73 ~~been found in Costa Rica or Panama [24]. This psyllid has now established small populations~~  
74 ~~in Canada [25] where previously it was not thought to overwinter. After a period of~~  
75 ~~surveillance, in 2017, *B. cockerelli* was found in areas of Western Australia [22], however Lso~~  
76 ~~has not yet been detected in psyllids or plants in these locations. In 2017, all developmental~~  
77 ~~stages of *B. cockerelli* were found in two locations in Ecuador on potato plants. This~~  
78 ~~represents the first finding of *B. cockerelli* in South America [26].~~

79 The phloem-limited bacterium '*Candidatus Liberibacter solanacearum*' (Lso) is a pathogen  
80 associated with Zebra Chip disease of potatoes [3,23–25] and disease in other Solanaceous  
81 crops such as cultivated tomato [1,3,26,27], pepper [28], eggplant [29], tobacco [30,31] and  
82 tomatillo [26]. Currently, *B. cockerelli* is the main vector of Lso in field and glasshouse-grown  
83 Solanaceous plants in the United States, Mexico, areas of Central America [27–30], Canada  
84 [32], ~~and~~ New Zealand [5,6,25] ~~and recently Ecuador~~ [33]. ~~Ten Lso haplotypes have been~~  
85 ~~described, only three of which are associated with disease in Solanaceous plants. While 9~~  
86 ~~haplotypes of Lso have hitherto been described in the literature (A, B, C, D, E, F, G, H, and U)~~  
87 ~~only three of the haplotypes, A, B and F, are associated with disease in Solanaceous plants.~~  
88 Haplotypes A, B, and F are associated with Zebra chip disease in America [3,34,35], whereas

89 only haplotype A has been found in New Zealand [5,36]. Haplotype B has also been found in  
90 *Bactericera maculipennis* (Crawford) [37]. The remaining haplotypes are not vectored by *B.*  
91 *cockerelli* but by closely related species in the Triozidae family. Haplotype G was found in 49  
92 year-old herbarium specimens of *Solanum umbelliferum* [39] but it is not known if it is able  
93 to infect potato. Haplotypes C, D, and E are associated with disease in Apiaceous crops in  
94 Europe [28,40–43] and Northern Africa [44,45]. Lso Haplotypes D and E are vectored mainly  
95 by *Bactericera trigonica* and to a lesser extent *Bactericera nigricornis* and *Bactericera*  
96 *tremblayi* [42,45,46]. These closely related *Bactericera* spp. are morphologically similar and  
97 substantial taxonomic expertise is required to accurately identify species. Currently the  
98 geographic distribution of *B. cockerelli* does not overlap with *B. trigonica* and *B. nigricornis*  
99 which makes field identification easier. However, in the event of an outbreak of *B. cockerelli*  
100 molecular diagnostic methods allow rapid identification by non-specialists and is particularly  
101 valuable in areas where other *Bactericera* spp. co-occur.

102 Haplotype C is found in Northern Europe where it is mainly vectored by *Trioza apicalis*  
103 which, together with psyllid feeding, causes up to 100% loss of Apiaceous crops in Finland  
104 [47,48] and Sweden [28] following transmission. Haplotype U is found in asymptomatic  
105 *Urtica dioica* (stinging nettle) and is vectored by the psyllid *Trioza urticae* but is not yet  
106 known to cause economic damage [49]. It seems that psyllid-mediated infection of host  
107 plants with Lso only occurs when the psyllid vector is on its preferred host. Infection of  
108 carrot plants with Lso haplotypes vectored by *B. cockerelli* and infection of potato plants by  
109 carrot psyllid vectored Lso only occurs very rarely *in vitro* and suggests that an efficient  
110 vector is necessary for wide-scale spread of Lso [46]. ~~Monitoring and prevention of the~~

Formatted: Space After: 22 pt, Adjust space between Latin and Asian text, Adjust space between Asian text and numbers

111 ~~spread of *B. cockerelli* is essential to prevent the risk of an outbreak of Lso on potato,~~  
112 ~~tomato and other Solanaceous crops in areas where it is not currently found [38].~~

113 The impact of *B. cockerelli* and associated Lso transmission on agriculture is significant. Since  
114 its arrival in New Zealand circa 2005 via human-mediated dispersal it has caused millions of  
115 dollars of economic losses [6,21]. Similarly, management of *B. cockerelli* in the US is  
116 reported to have cost millions of dollars per year in major potato growing areas such as  
117 Texas [38] and the Pacific North-West [39]. In 2008, the reduction in exports of *capsicum*  
118 and losses in exports of tomato due to closure of New Zealand's export markets were  
119 estimated to have cost \$NZ 5.22 million and \$NZ 3 million respectively [21]. Direct crop  
120 losses caused by symptoms of Lso on tomato in glasshouse were estimated at \$NZ 1 million  
121 [6]. Within 3 years in the mid 2000s the management of *B. cockerelli* in Texas was estimated  
122 to have cost \$US 25.86 million [39]. Control of *B. cockerelli* in the Pacific North West, where  
123 over 50% of US potatoes are grown, costs approximately \$US 11 million a year [40]. The  
124 introduction of *B. cockerelli* into potato growing regions in Europe or Asia would be  
125 devastating to the agricultural industry of those regions. If *B. cockerelli*, or a sufficient vector  
126 of Solanaceous Lso haplotypes, were to invade Europe it is estimated that the effects of Lso  
127 damage on potato and tomato would cost € 222 million per year and the negative impact of  
128 social welfare could cost an additional estimated € 114 million [40].

Formatted: Font: Italic

129 Currently, *B. cockerelli* is considered an A1 quarantine pest in the EPPO region ~~and is not~~  
130 ~~present in any part of the region~~ [4]. Consignments of aubergine and *Capsicum* from Mexico  
131 ~~that were~~ infested with immatures and adult stages of *B. cockerelli* were intercepted four  
132 times during UK border inspections between 2017-2018 at Heathrow Airport (London,  
133 England, UK) in 2017, indicating that there is a real threat of this pest making an incursion

Formatted: Font: Italic

134 into the EPPO region if not properly monitored [41]. Monitoring and prevention of the  
135 spread of *B. cockerelli* is essential to prevent the risk of an outbreak of Lso on potato,  
136 tomato and other Solanaceous crops in areas where it is not currently found [42]. There is  
137 therefore an evident need for a rapid and accurate diagnostic test to identify *B. cockerelli* at  
138 all life stages not only as a tool to support import inspections, but also to assist monitoring,  
139 eradication and control strategies. is evident ~~Monitoring and prevention of the spread of *B.*~~  
140 ~~*cockerelli* is essential to prevent the risk of an outbreak of Lso on potato, tomato and other~~  
141 ~~Solanaceous crops in areas where it is not currently found [38]. It will assist the prevention~~  
142 ~~of accidental introductions via human mediated dispersal and, in the event of an existing~~  
143 ~~outbreak, will support the rapid identification of this pest and subsequent control strategies.~~

144 We designed a species-specific real-time PCR diagnostic assay to detect all life-stages of *B.*  
145 *cockerelli*, eggs, immatures and adults. The assay provides a rapid diagnostic test to quickly  
146 determine the presence of *B. cockerelli*, allowing for the early detection of  
147 invasions/introductions and aiding in the prevention of spread of this psyllid.

148

## 149 **2. Materials and Methods**

### 150 **2.1. Specimen collection**

151 The assay was tested on 28 target adults *B. cockerelli* specimens and 73 non-target species  
152 consisting of 110 specimens see results section 3.1 for more info on samples (Supp Tab. S1).

153 The classification follows Burckhardt & Ouvrard [43], and a complete taxonomic account of  
154 each species is given in Ouvrard [20]. Psyllid identifications were confirmed against  
155 reference type specimens in the NHM London collections. To account for intraspecific

156 genetic variation, we obtained *B. cockerelli* specimens from Mexico (Universidad Autónoma  
157 Agraria Antonio Narro) and USA (USDA, Agricultural Research Services) from colony  
158 collections of each of the four recognised biotypes of *B. cockerelli* in Central America, the  
159 Central, Western, North-Western, and South-Western biotypes [19]. Specimens of *B.*  
160 *cockerelli* were also obtained from New Zealand lab-reared colonies (Plant Research, New  
161 Zealand). Non-target specimens were mainly obtained from 12.2 m suction-traps in the  
162 United Kingdom that form part of the Rothamsted Insect Survey network described here  
163 [44]. Specimens were also obtained from suction-traps in Finland, Germany, Spain and  
164 Sweden; as well as from field collections from Finland, Israel, Mexico, Serbia, Spain, UK and  
165 USA. Non-target specimens from different regions of the USA were used to test assay  
166 specificity on species that are commonly found in the same region as *B. cockerelli*. As  
167 immatures and eggs are the most likely life stages that inspectors might find on imported  
168 plant material, we also tested the assay on DNA extracted from immatures and eggs from  
169 Mexico and the USA for validation.

## 170 **2.2. DNA extraction, PCR, and DNA sequencing for identification of psyllids**

171 DNA for sequencing and assay validation was extracted from psyllids using a non-destructive  
172 method first described in [45] and adapted from [46]. Psyllid specimens were preserved in  
173 95% Ethanol: 5% Glycerol solution. Using a 15mm long, 0.15mm diameter stainless steel  
174 entomological head-less pin (A3 size, Watkins and Doncaster) mounted in a holder,  
175 specimens were initially pierced fully through the abdomen and half-way through the thorax  
176 from the dorsal side while attempting to minimise damage to head, legs, wings, terminalia  
177 and other body parts that are used for taxonomic identification. ~~Pierced-Micro-dissected~~  
178 specimens were placed in a microcentrifuge tube containing 180 µl of ATL buffer and 20 µl

179 of proteinase-k as outlined in the DNeasy Blood and Tissue Kit from Animal Tissues (Qiagen).  
180 Samples were placed in a shaking incubator over-night (~8-10 hrs) at 56 °C at 300 rpm. The  
181 protocol for DNA extraction in DNeasy Blood and Tissue Kit Protocol from Animal Tissues  
182 (Qiagen) was followed and the psyllid integument voucher specimen was stored in 95%  
183 Ethanol: 5% Glycerol for morphological identification. Psyllids were DNA barcoded using one  
184 or two gene regions. The internal transcribed spacer 2 (ITS2) and cytochrome c oxidase  
185 subunit 1 (CO1) were amplified and sequenced for identification of different psyllid species.  
186 For amplification of ITS2 primers CA55p8sFcm-F and CA28sB1d-R [47] were used; and for  
187 amplification of CO1 gene regions arthropod barcoding Primers LCO1490 and HCO2198 [48]  
188 were used. All reactions were performed in 20 µl consisting of: 10 µl 2x Type-It  
189 Microsatellite PCR Kit Master Mix (Qiagen); 0.24 µM µl (~~10 µM stock~~) each forward and  
190 reverse primer; 7.2 µl molecular grade water (Sigma-Aldrich) and 2 µl of psyllid template  
191 DNA. Reactions were run on a Veriti 96-well thermal cycler (Applied Biosystems) using the  
192 following programs. ITS2: 95°C for 5 mins; 25 x cycles of (95°C for 30 s, 56°C for 90 s, 72°C  
193 for 30 s); and a final extension at 72°C for 10 mins. CO1: 94°C for 5 mins; 5 x cycles of (94°C  
194 for 30s, 45°C for 30s, 72°C for 1 min); 25 x cycles of (94°C for 30s, 51°C for 1 min, 72°C for 1  
195 min); and a final extension of 72°C for 10 mins. PCR amplified gene regions were cleaned-up  
196 using EXO-SAP and Ethanol precipitation, then sequenced using the BigDye Terminator Cycle  
197 Sequencing Kit (Applied Biosystems), forward and reverse complimentary DNA strands were  
198 sequenced separately for each sample and analysed using a 3500xL Genetic Analyser  
199 (Applied Biosystems).

### 200 **2.3. Bioinformatics and Real-Time PCR Assay Design**

201 Sequence editing, assembly and alignment were performed on “.AB1” trace files uploaded  
202 to Geneious R11 v 11.1.5 (Biomatters Ltd.). Contigs were assembled after trimming sections  
203 of low-quality sequence and aligning the complimentary strands using CLUSTAL-W multiple  
204 sequence alignment method [49]. Final contigs for each species and each gene region were  
205 aligned to identify variable areas suitable as targets for *B. cockerelli* specific primer and  
206 probe sets. Primers and probes were designed using manual selection of target-specific  
207 regions analysed using the “Basic Local Alignment Search Tool” (BLAST) [50] against the  
208 NCBI GenBank database [51] and processing of selected regions for suitability/ specificity in  
209 “Primer3” [52] and “Primer-BLAST” software [53]. Primer annealing temperature, hairpin  
210 formation, self-complementarity, GC content and were assessed using “Primer3” [52].  
211 Potential amplification of non-specific insect species was checked using Primer BLAST which  
212 includes all psyllid species present in the GenBank database. Primer and probe sets were  
213 selected/rejected based on the following parameters: primer annealing temperature 59-  
214 62°C; primer annealing temperature + 8-10°C for probe annealing temperature; no more  
215 than 2°C difference in annealing temperature between primers, max probe length 30bp, no  
216 more than 3 Gs in a row in probe, amplicon length max 300bp and specificity to *B. cockerelli*.

#### 217 **2.4. Real-time PCR Set-up and Standards**

218 To calculate standard curves DNA standards of *B. cockerelli* were prepared using dilution  
219 series of linearized cloned plasmid DNA. DNA was extracted as above using the non-  
220 destructive method, amplified and cloned into competent *Escherichia coli* cells using the  
221 TOPO TA cloning kit (Thermo-Fisher). DNA from successfully transformed colonies was  
222 extracted using “PureYield Plasmid Miniprep System” (Promega). For assay validation DNA  
223 was cloned from other psyllid species ([see results section 3.1](#))(~~Supp Tab S1~~). Stock DNA 10



224 ng/μl was linearised from cloned plasmid DNA using EcoRI restrictions enzyme (New  
225 England Biolabs), 0.5 μl of enzyme was added to 100 μl of stock DNA, this solution was  
226 incubated in a heat block (Thermomixer C, Eppendorf) at 37 °C for 15 mins. The enzyme was  
227 then deactivated at 65 °C for 20mins. Real-time PCRs were performed in 15 μl volumes  
228 including: 6.75 μl Jumpstart Taq Ready Mix (Sigma); 1.2 μl MgCl<sub>2</sub> (25mM); 0.45 μl of each  
229 primer; 0.15 μl probe; 4 μl of molecular grade water (Sigma); and 2 μl of template DNA. The  
230 standard real-time PCR cycle program was as follows. Hold stage: 50 °C for 2 mins then; 95  
231 °C for 10 mins. PCR stage: 40 cycles of ( 95 °C for 15 secs; X °C for 1 min), with primer  
232 annealing temperature X being 58, 60, 62, 64, or 68; depending on the experiment. Primer  
233 concentration, MgCl<sub>2</sub> concentration and temperature was adjusted for validation and  
234 optimization of the assay as described below. Reactions were performed on a “QuantStudio  
235 6 Flex” (Applied Biosystems) real-time PCR machine and analysis was done on the  
236 “QuantStudio Real-Time PCR Software” (Applied Biosystems).

## 237 **2.5. Assay validation**

### 238 **2.5.1. Specificity**

239 The final primer and probe set was tested on genomic DNA from 47 *B. cockerelli* specimens  
240 from different life stages. These included the 4 US biotypes [17,54] and specimens from  
241 New Zealand to determine false negatives. The assay was tested for specificity against  
242 genomic DNA of 73 non-target psyllid species collected as mentioned above, to detect false  
243 positives. This included a total of 8 other closely related *Bactericera* spp. and the major  
244 vectors of Lso on Apiaceous crops (*B. nigricornis*, *B. trigonica* and *Trioza apicalis*).

245 Information regarding samples tested is in results section 3.1. The assay was also checked  
246 for cross-reaction against potato genomic DNA (*Solanum tuberosum*), 3 samples of *S.*

247 ~~tuberosum 'Maris Piper' were tested in replicates of 8. All information on specimens and~~  
248 ~~DNA samples can be found in (Supp Tab. S1).~~ All reactions with non-target ~~psyllid~~ DNA were  
249 run in conjunction with a TaqMan Exogenous Internal Positive Control Reagent Kit (Applied  
250 Biosystems) to rule out the possibility that~~ensure~~ false positives were not obtained due to  
251 inhibition within the reaction. DNA from all non-target psyllids was sequenced in either ITS2,  
252 CO1 or both to ensure psyllid DNA was present in all reactions to rule out false negatives  
253 due to inefficient DNA extraction. Reactions were performed in duplicate at least, with a  
254 higher number of replicates for species closely related to *B. cockerelli* ~~(Supp Tab. S1)~~. False  
255 positives were defined as reactions with non-target DNA that showed fluorescence above  
256 the cycle threshold during 40 cycles; and false negatives were defined as reactions with *B.*  
257 *cockerelli* DNA that did not give a  $C_t$  after 40 cycles.

### 258 **2.5.2. Sensitivity**

259 Experiments were performed to determine the limit of detection of the assays. DNA  
260 standards were produced using *B. cockerelli* linearized cloned DNA from the ITS2 region. A  
261 nine point 10-fold dilution series starting with 10 ng/ $\mu$ l DNA up to  $10^{-8}$  ng/ $\mu$ l of linearised  
262 plasmid DNA and genomic DNA was used to determine the limit of detection. 100ng/ $\mu$ l  
263 stock DNA concentration was initially checked using QuBit 4 Fluorometer (Invitrogen) and 5  
264  $\mu$ l was added to 45  $\mu$ l of molecular grade water (Sigma-Aldrich) to dilute 1:10; ~~eight~~<sup>6</sup>  
265 subsequent dilutions were made. ~~Stock DNA 10 ng/ $\mu$ l was linearised using EcoRI restrictions~~  
266 ~~enzyme (New England Biolabs), 0.5  $\mu$ l of enzyme was added to 100  $\mu$ l of stock DNA, this~~  
267 ~~solution was incubated in a heat block (Thermomixer C, Eppendorf) at 37 °C for 15 mins. The~~  
268 ~~enzyme was then deactivated at 65 °C for 20mins.~~ Linearised and non-linearised DNA was  
269 compared along with genomic DNA. The ability of the assay to detect immatures and eggs

270 was also tested. DNA from various instars of immatures was extracted using the non-  
271 destructive protocol described above. Batches of 1 egg, 5 eggs and 10 eggs were extracted  
272 using the DNeasy Blood & Tissue kit (Qiagen) and initially broken with a pestle.

### 273 **2.5.3. Repeatability and Reproducibility**

274 Variation in the performance of the assay between runs and within runs was assessed at a  
275 0.2  $\mu\text{M}$  primer concentration, with 1.5mM  $\text{MgCl}_2$ , and 60 °C annealing temperature.  
276 Linearised plasmid DNA from *Escherichia coli* transformed with *B. cockerelli* ITS2 DNA was  
277 used. A six point 1:10 dilution series starting at 10ng/ $\mu\text{l}$  was used with each dilution being  
278 performed in triplicate. The same experiment was repeated 3x simultaneously. Runs and  
279 variations between the three experiments were recorded and analysed using QuantStudio 6  
280 Real-Time PCR Software. An identical plate following the same plate set-up and reaction mix  
281 was run simultaneously on another QuantStudio 6 real-time PCR machine to compare inter-  
282 run variation.

### 283 **2.5.4. Robustness/Optimization**

284 Amplification of target DNA, specificity and sensitivity at different  $\text{MgCl}_2$  concentration,  
285 primer concentrations and annealing temperatures were performed to assess robustness.  
286 The assay was tested with 1.5, 3.5, 5.5, 7.5 and 9.5mM  $\text{MgCl}_2$  concentration. For primers,  
287 0.1, 0.2, 0.3, 0.5 and 1.0  $\mu\text{M}$  concentrations were tested. The assay was also tested at  
288 different annealing temperatures 58, 60, 62, 64, 68 °C across. For each tested parameter,  
289 optimization was performed across a ~~ninen-eight~~ point 1:10 dilution series starting at  
290 10ng/ $\mu\text{l}$  DNA. All samples were tested in triplicates. Closely related *Bactericera* species were  
291 included in these assays to assess specificity under different assay conditions. After

292 optimization of the assay a multifactorial robustness test was performed across two  
293 different real-time PCR machines to test the combined effects of small changes/errors in the  
294 PCR set-up. The assays were run on a “QuantStudio 6 Flex” (Applied Biosystems) and “CFX96  
295 Real-Time System” (BioRad); results were analysed using “QuantStudio 6 Real-Time PCR  
296 Software” (Applied Biosystems) and “CFX Manager 3.1” (BioRad). The methodology used  
297 followed the European Network of GMO Laboratories (ENGL) recommendations [55].

### 298 **3. RESULTS**

#### 299 **3.1. DNA extraction, PCR, and DNA sequencing for identification of psyllids**

300 DNA from 110 psyllid specimens comprising 73 different species were extracted, amplified  
301 and sequenced successfully from either CO1 or ITS2 gene regions, or both (Supp-Tab. S1).

| Family           | Genus           | Species          | Voucher ID         | Collection Location | Collection method  | CO1 Ac#          | ITS2 Ac#         | Tech Reps | Youc<br>hr |   |   |
|------------------|-----------------|------------------|--------------------|---------------------|--------------------|------------------|------------------|-----------|------------|---|---|
| Aphalaridae      | Aphalara        | avicularis       | 160718.A.avi.23    | Wellesbourne, UK    | suction trap       | MT021761         | /                | 2         | 1          |   |   |
|                  |                 | polygona         | 160718.A.pol.22    | Wellesbourne, UK    | suction trap       | /                | MT038907         | 2         | 1          |   |   |
|                  | Blastopsylla    | occidentalis     | 180312.BI.occ.24   | Salamanca, Spain    | suction trap       | MN272146         | MN316692         | 2         | 3          |   |   |
|                  |                 | Craspedolepta    | quiterrezae        | 160825.5 US         | Nevada, USA        | field collection | MT021786         | MT038962  | 2          | 1 |   |
|                  | Rhinocola       | minutissima      | 160825.1 US        | Nevada, USA         | field collection   | MT021787         | MT038963         | 2         | 1          |   |   |
|                  |                 |                  | 160825.10 US       | Oregon, USA         | field collection   | MT021789         | /                | 2         | 1          |   |   |
|                  |                 |                  | 160825.4 US        | Nevada, USA         | field collection   | MT021788         | /                | 2         | 1          |   |   |
|                  |                 | nervosa          | 160728.Cra.ner.2   | Gogarbank, UK       | suction trap       | MT021790         | MT038964         | 2         | 1          |   |   |
|                  |                 | pinicola         | 160825.2 US        | Nevada, USA         | field collection   | /                | MT038965         | 2         | 1          |   |   |
|                  |                 | subpunctata      | 160421.C.sub.5     | Gogarbank, UK       | suction trap       | MT021791         | MT038966         | 2         | 1          |   |   |
|                  |                 | aceris           | 151014.R.ace.14    | Wellesbourne, UK    | suction trap       | MT021810         | MT038979         | 2         | 2          |   |   |
|                  |                 | Lividae          | citri              | 160309.D.cit.6      | Lab Colony,        | Lab Reared       | MT021794         | MT038969  | 2          | 1 |   |
|                  |                 |                  | Euphyllura         | olivina             | 180125.Eup.oliv.3  | Plants imported  | on imported Olea | MT021797  | MT038970   | 2 | 3 |
|                  |                 |                  | Livia              | crefeldensis        | 180312.L.cre.5     | Salamanca, Spain | Suction trap     | MN316678  | MN272127   | 2 | 3 |
| junci            | 160404.L.jun.1  |                  |                    | Broom' s Barn, UK   | suction trap       | MT021801         | /                | 2         | 2          |   |   |
| Psyllidae        | Arvtaina        | oenistae         | 151203.A.oen.21    | Avr, UK             | suction trap       | /                | MT038909         | 2         | 1          |   |   |
|                  |                 | gredi            | 180312.A.gre.1     | Salamanca, Spain    | suction trap       | MN272123         | MN316677         | 2         | 3          |   |   |
|                  | Arytainilla     | spartiophila     | 180716.A.spa.29    | SASA, Edinburgh,    | suction trap       | MT021762         | MT038908         | 2         | 3          |   |   |
|                  |                 | Baeopelma        | foersteri          | 151203.B.foe.1J     | Avr, UK            | suction trap     | /                | MT038944  | 2          | 1 |   |
|                  | Cacopsylla      | foersteri        | 160928.B.foe.2     | SASA, UK            | suction trap       | MT021776         | /                | 2         | 1          |   |   |
|                  |                 | affinis          | 151203.C.aff.1     | Wye, UK             | suction trap       | MT021777         | MT038945         | 2         | 2          |   |   |
|                  |                 | ambigua          | 160404.C.amb.4     | Wye, UK             | suction trap       | /                | MT038946         | 2         | 2          |   |   |
|                  |                 | ambigua          | 161024.C.amb.3     | Preston, UK         | suction trap       | /                | MT038947         | 2         | 1          |   |   |
|                  |                 | americana        | 160825.3 US        | Nevada, USA         | field collection   | MT021778         | MT038948         | 2         | 1          |   |   |
|                  |                 | brunneipennis    | 160309.C.bru.8     | Wye, UK             | suction trap       | /                | MT038949         | 2         | 2          |   |   |
| crataegi         |                 | 160404.C.cra.3   | Broom' s Barn, UK  | suction trap        | MT021779           | MT038950         | 2                | 2         |            |   |   |
| mali             |                 | 180910.C.mal.30  | Elcho Castle       | field collection    | /                  | MT038951         | 2                | 3         |            |   |   |
| melanoneura      |                 | 160718.C.mel.6   | Kirtun, UK         | suction trap        | /                  | MT038952         | 2                | 3         |            |   |   |
| moscovita        |                 | 190109.C.mos.1   | Quedlinburg,       | suction trap        | /                  | /                | 2                | 3         |            |   |   |
| peregrina        | 161024.C.per.11 | Silwood Park, UK | suction trap       | MT021780            | MT038953           | 2                | 1                |           |            |   |   |
| pruni            | 160203.C.pru.18 | Wellesbourne, UK | suction trap       | /                   | MT038954           | 2                | 2                |           |            |   |   |
| pulchra          | 160718.C.pul.15 | Elgin, UK        | suction trap       | /                   | MT038955           | 2                | 1                |           |            |   |   |
| pyricola         | 160203.C.pco.2  | Wye, UK          | suction trap       | MT021781            | MT038956           | 2                | 2                |           |            |   |   |
| saliceti         | 161024.C.sal.7  | York, UK         | suction trap       | /                   | MT038958           | 2                | 1                |           |            |   |   |
| sorbi            | 161024.C.sor.8  | Preston, UK      | suction trap       | MT021782            | MT038959           | 2                | 1                |           |            |   |   |
| rhamnocola       | 151014.C.rha.8  | Wellesbourne, UK | suction trap       | /                   | MT038957           | 2                | 2                |           |            |   |   |
| ulmi             | 171011.C.ulmi.1 | Quedlinburg,     | suction trap       | MT021783            | MT038960           | 2                | 3                |           |            |   |   |
| Ceanothia        | ceanothi        | 160825.9 US      | Oregon, USA        | field collection    | MT021784           | /                | 2                | 1         |            |   |   |
| Chamaepsylla     | hartigii        | 160728.Ch.har.1  | Gogarbank, UK      | suction trap        | MT021785           | MT038961         | 2                | 1         |            |   |   |
| Euglyptoneura    | fuscipennis     | 160825.7 US      | Oregon, USA        | field collection    | MT021795           | /                | 2                | 1         |            |   |   |
|                  | robusta         | 160825.8 US      | Oregon, USA        | field collection    | MT021796           | /                | 2                | 1         |            |   |   |
| Heteropsylla     | texana          | 160825.11 US     | Texas, USA         | field collection    | MT021798           | /                | 2                | 1         |            |   |   |
| Psylla           | alni            | 161019.P.aln.1   | Sweden             | suction trap        | MT021804           | /                | 2                | 1         |            |   |   |
|                  | buxi            | 180622.P.buxi.22 | Scotland, UK       | suction trap        | MT021806           | MT038976         | 2                | 3         |            |   |   |
|                  | betulae         | 161123.P.bet.20  | Jokioinen, Finland | suction trap        | MT021805           | MT038975         | 2                | 3         |            |   |   |
|                  | discrepans      | 151002.P.dis.8   | Sweden             | suction trap        | MT021807           | /                | 2                | 1         |            |   |   |
|                  | fraxini         | 180716.P.fri.33  | SASA HQ,           | suction trap        | MT021808           | MT038977         | 2                | 3         |            |   |   |
|                  | fraxinicola     | 160203.P.fra.6   | Wellesbourne, UK   | suction trap        | MT021809           | MT038978         | 2                | 2         |            |   |   |
|                  | Spanioneura     | fonscolombii     | 180802.S.fon.29    | SASA HQ,            | field collection   | /                | MT038980         | 2         | 3          |   |   |
| Spondylaspididae | Ctenarytaina    | spatulata        | 160404.Ct.spa.6    | Wye, UK             | suction trap       | MT021792         | MT038967         | 2         | 2          |   |   |
|                  | spatulata       | 161024.Ct.spa.5  | Wye, UK            | suction trap        | MT021793           | MT038968         | 2                | 1         |            |   |   |
| Triozidae        | Bactericera     | albiventris      | 171214.B.alb.11    | Jokioinen, Finland  | suction trap       | /                | MT038910         | 5         | 3          |   |   |
|                  |                 | curvatimervis    | 161123.B.cur.42    | Jokioinen, Finland  | suction trap       | /                | MT038911         | 5         | 3          |   |   |
|                  |                 | dorsalis         | 160803.B.dor.2     | Florida, USA        | lab colony         | MT021763         | MT038912         | 5         | 3          |   |   |
|                  |                 | maculipennis     | 190604.B.mac.1     | Lab Colony, USA     | Lab Reared         | /                | MT038913         | 2         | 3          |   |   |
|                  |                 |                  | 190604.B.mac.2     | Lab Colony, USA     | Lab Reared         | /                | MT038914         | 2         | 3          |   |   |
|                  |                 |                  | 190604.B.mac.3     | Lab Colony, USA     | Lab Reared         | /                | MT038915         | 2         | 3          |   |   |
|                  |                 |                  | 190604.B.mac.4     | Lab Colony, USA     | Lab Reared         | /                | MT038916         | 2         | 3          |   |   |
|                  |                 |                  | 190604.B.mac.5     | Lab Colony, USA     | Lab Reared         | /                | MT038917         | 2         | 3          |   |   |
|                  |                 |                  | 190604.B.mac.6     | Lab Colony, USA     | Lab Reared         | /                | MT038918         | 2         | 3          |   |   |
|                  |                 |                  | 190604.B.mac.7     | Lab Colony, USA     | Lab Reared         | /                | MT038919         | 2         | 3          |   |   |
|                  |                 |                  | nigricornis        | 170324.B.nig.18     | Spain              | field collection | MT021764         | MT038920  | 5          | 3 |   |
|                  |                 |                  |                    | 170324.B.nig.22     | Spain              | field collection | MT021765         | MT038921  | 5          | 3 |   |
|                  |                 |                  | salicivora         | 190116.B.sal.1      | Elgin, Scotland,   | suction trap     | /                | /         | 6          | 3 |   |
|                  |                 |                  | striola            | 161123.B.str.9      | Jokioinen, Finland | suction trap     | /                | MT038922  | 5          | 3 |   |
|                  |                 |                  | tremblayi          | 170731.B.tre.5      | Slanci, Belgrade,  | field collection | /                | MT038923  | 5          | 3 |   |
|                  |                 |                  |                    | 190604.B.trem.1     | Spain              | Lab Colony       | /                | MT038924  | 2          | 3 |   |
|                  |                 |                  |                    | 190604.B.trem.1     | Spain              | Lab Colony       | /                | MT038925  | 2          | 3 |   |
|                  |                 |                  |                    | 190604.B.trem.1     | Spain              | Lab Colony       | /                | MT038926  | 2          | 3 |   |
|                  |                 |                  |                    | 190604.B.trem.2     | Spain              | Lab Colony       | /                | MT038927  | 2          | 3 |   |
|                  |                 |                  |                    | 190604.B.trem.2     | Spain              | Lab Colony       | /                | MT038928  | 2          | 3 |   |
|                  |                 |                  | trigonica          | 170629.B.tri.16     | Tunisia            | field collection | MT021766         | MT038929  | 3          | 3 |   |
|                  |                 |                  |                    | 170629.B.tri.17     | Tunisia            | field collection | /                | MT038930  | 3          | 3 |   |
|                  |                 |                  |                    | 170629.B.tri.18     | Tunisia            | field collection | MT021767         | MT038931  | 3          | 3 |   |

Formatted Table

|                     |                      |                  |                   |                  |          |          |   |   |
|---------------------|----------------------|------------------|-------------------|------------------|----------|----------|---|---|
|                     |                      | 181010.B.tri.17  | Spain             | Lab Colony       | MT021768 | MT038932 | 2 | 3 |
|                     |                      | 181010.B.tri.18  | Spain             | Lab Colony       | MT021769 | MT038933 | 2 | 3 |
|                     |                      | 181010.B.tri.19  | Spain             | Lab Colony       | /        | MT038934 | 2 | 3 |
|                     |                      | 181010.B.tri.20  | Spain             | Lab Colony       | MT021770 | MT038935 | 2 | 3 |
|                     |                      | 181010.B.tri.21  | Spain             | Lab Colony       | /        | MT038936 | 2 | 3 |
|                     |                      | 190604.B.tri.23  | Spain             | Lab Colony       | MT021771 | MT038937 | 2 | 3 |
|                     |                      | 190604.B.tri.24  | Spain             | Lab Colony       | /        | MT038938 | 2 | 3 |
|                     |                      | 190604.B.tri.25  | Spain             | Lab Colony       | MT021772 | MT038939 | 2 | 3 |
|                     |                      | 190604.B.tri.26  | Spain             | Lab Colony       | MT021773 | MT038940 | 2 | 3 |
|                     |                      | 190604.B.tri.27  | Spain             | Lab Colony       | MT021774 | MT038941 | 2 | 3 |
|                     |                      | 190604.B.tri.28  | Spain             | Lab Colony       | /        | MT038942 | 2 | 3 |
|                     |                      | 190604.B.tri.29  | Spain             | Lab Colony       | MT021775 | MT038943 | 2 | 3 |
| <i>Heterotrioza</i> | <i>chenopodii</i>    | 160203.H.che.11  | Kirton, UK        | suction trap     | /        | MT038971 | 2 | 2 |
|                     |                      | 160825.12.US     | Washington, USA   | field collection | MT021799 | /        | 2 | 1 |
| <i>Lauritrioza</i>  | <i>alacris</i>       | 160816.L.la.a.2  | Spain             | suction trap     | MT021800 | MT038972 | 2 | 1 |
| <i>Powellia</i>     | <i>vitreoradiata</i> | 161024.P.vit.10  | Kirton, UK        | suction trap     | MT021803 | MT038974 | 2 | 1 |
| <i>Trioza</i>       | <i>albifrons</i>     | 160825.18.US     | Nevada, USA       | field collection | MT021811 | MT038981 | 2 | 1 |
|                     | <i>anthrisci</i>     | 150708.T.ant.11  | Jokionen, Finland | field collection | MT021812 | /        | 2 | 3 |
|                     | <i>apicalis</i>      | 161019.T.api.5   | Sweden            | field collection | MT021813 | /        | 2 | 3 |
|                     | <i>buxtoni</i>       | 170324.T.bux.11  | Israel            | field collection | MT021814 | MT038982 | 2 | 3 |
|                     | <i>centranthi</i>    | 161024.T.cen.9   | Wye, UK           | suction trap     | MT021815 | /        | 2 | 1 |
|                     | <i>cerastii</i>      | 171214.T.cer.32  | Vikki, Finland    | suction trap     | MT021816 | MT038983 | 2 | 3 |
|                     | <i>dispar</i>        | 160718.T.disp.26 | Hellfreda, Sweden | suction trap     | MT021817 | /        | 2 | 1 |
|                     | <i>erytraeae</i>     | 160808.ICA.19    | Spain             | Lab Colony       | /        | MT038984 | 2 | 1 |
|                     | <i>flavipennis</i>   | 160421.T.fl.a.3  | Sweden            | suction trap     | MT021818 | MT038985 | 2 | 1 |
|                     | <i>galii</i>         | 160203.T.gal.23  | Wellesbourne, UK  | suction trap     | /        | MT038986 | 2 | 2 |
|                     | <i>remota</i>        | 160718.T.rem.8   | Sweden            | suction trap     | /        | MT038987 | 2 | 1 |
|                     |                      | 180424.T.rem.1   | Dundee, UK        | Suction trap     | MT021819 | MT038988 | 3 | 3 |
|                     |                      | 180424.T.rem.6   | Dundee, UK        | Suction trap     | MT021820 | MT038989 | 3 | 3 |
|                     |                      | 180424.T.rem.16  | Dundee, UK        | Suction trap     | MT021821 | MT038990 | 3 | 3 |
|                     |                      | 180424.T.rem.18  | Dundee, UK        | Suction trap     | MT021822 | MT038991 | 3 | 3 |
|                     |                      | 180424.T.rem.19  | Dundee, UK        | Suction trap     | /        | MT038992 | 3 | 3 |
|                     |                      | 190116.T.rem.7   | UK                | Suction trap     | MT021823 | MT038993 | 3 | 3 |
|                     | <i>rhamni</i>        | 151002.T.rha.13  | Sweden            | suction trap     | MT021824 | MT038994 | 2 | 1 |
|                     | <i>tatrensis</i>     | 160718.T.tat.27  | Sweden            | suction trap     | /        | MT038995 | 2 | 1 |
|                     | <i>urticae</i>       | 160816.T.urt.17  | Spain             | field collection | /        | MT038996 | 2 | 1 |

302 **Table 1:** Information on non-target psyllid species and plant specimens tested using the *B.*  
303 *cockerelli* real-time PCR assay Bcoc\_JSK2 showing number of technical replicates and false  
304 positives. All non-target species gave 0% false positives. GenBank Accession numbers are  
305 included for ITS2 and CO1 regions if sequencing was successful. Voucher Location: 1= 1; 2= 2  
306 Research Insect Survey; 3= SASA Hemipteran DNA Database. All DNA samples are stored in  
307 the SASA Hemipteran DNA database.

Formatted: Line spacing: 1.5 lines

### 308 3.2. ***Bioinformatics and Real-Time PCR Assay Design.***

309 While differentiation within both the ITS2 and CO1 gene regions was sufficient to  
310 discriminate between psyllid species, the ITS2 gene region was more suitable for TaqMan  
311 assay design for *B. cockerelli*. Similarities between CO1 gene sequences between members  
312 of the *Bactericera* genus and *B. cockerelli* were higher than in the ITS2 region (average %  
313 similarity = 82.51 ± 0.68 for CO1 and 77.80 ± 4.79 for ITS2) (Tab. 24). The ITS2 region  
314 showed larger sections of variability along the gene on which to design primers and probes.

315 Several primer and probe sets passed the selection criteria, but most were unsuitable due to  
 316 high rate of false positives from closely related *Bactericera* species. The final primer and  
 317 probe set Bcoc\_JSK2 (Tab. 32) targets a 187bp region of the ITS2 gene (Fig. 1).

| Species                 | ITS2         |            |              | CO1          |            |              |
|-------------------------|--------------|------------|--------------|--------------|------------|--------------|
|                         | % Similarity | bp         | GC content % | % Similarity | bp         | GC content % |
| <i>B. trigonica</i>     | 78.96        | 662        | 59.3         | 82.88        | 509        | 35.4         |
| <i>B. tremblayi</i>     | 79.16        | 665        | 59.1         | 82.97        | 682        | 33           |
| <i>B. curvatinervis</i> | 80.30        | 655        | 58           | 82.23        | 678        | 34.7         |
| <i>B. nigricornis</i>   | 81.16        | 668        | 59.3         | 81.28        | 521        | 36.7         |
| <i>B. albiventris</i>   | 76.67        | 667        | 59.2         | 83.41        | 663        | 32.9         |
| <i>B. dorsalis</i>      | 65.59        | 560        | 61.3         | 82.31        | 685        | 32.6         |
| <i>B. maculipennis</i>  | 80.67        | 674        | 61.6         | nd           | nd         | nd           |
| <i>B. salicivora</i>    | nd           | nd         | nd           | nd           | nd         | nd           |
| <i>B. striola</i>       | 79.91        | 663        | 59.1         | nd           | nd         | nd           |
| <i>B. cockerelli</i>    | <u>N/A</u>   | <u>569</u> | <u>61.0</u>  | <u>N/A</u>   | <u>595</u> | <u>32.6</u>  |

| Oligo Name | Function | Sequence 5'-3' | Tm | Length (bp) |
|------------|----------|----------------|----|-------------|
|------------|----------|----------------|----|-------------|

|             |                 |                          |      |    |
|-------------|-----------------|--------------------------|------|----|
| Bcoc_JSK2-f | forward primer  | GAGGTCTCCTCATCGTGC       | 61   | 25 |
| Bcoc_JSK2-r | reverse primer  | GGACGAGCATTGCTGCTGC      | 62.2 | 23 |
| Bcoc_JSK2-p | probe (FAM-BHQ) | GCAAACGCGGCACAAGTACCGCGC | 70.9 | 25 |

318 **Table 24.** Closely related *Bactericera* species tested with Bcoc\_JSK2 assay. ITS similarity = %  
319 identity to DNA sample 150727.B.coc.1. CO1 similarity = % identity to a consensus  
320 sequences of all *B. cockerelli* sequences obtained during this study. CO1 genes showed  
321 higher similarity and ~~fewer generally less conserved and~~ variable regions compared to ITS2  
322 regions. Highest % similarity ~~in~~ to *B. cockerelli* in the ITS2 region was found in *B. nigricornis*  
323 (81.16) and to *B. albiventris* in the CO1 region (83.41). The Bcoc\_JSK2 assay does not give  
324 false positives with any of the species listed here. (nd= not determined due to sequencing  
325 failing).

326 **Table 32.** Final oligonucleotide sequences for the Bcoc\_JSK2 TaqMan real-time PCR assay to  
327 identify *B. cockerelli*. The assay targets a 187 bp region of the ITS2 gene region.

| Sample name     | Life Stage | Origin             | Ct ave | Tech reps | CO1 Ac#  | ITS2 Ac# | DNA Source |
|-----------------|------------|--------------------|--------|-----------|----------|----------|------------|
| 181119.B.coc.06 | 1 egg      | Mexico             | 29.80  | 2         | /        | MT027568 | Genomic    |
| 191003.B.coc.01 | 1 egg      | Mexico             | 33.41  | 3         | /        | MT027592 | Genomic    |
| 191003.B.coc.02 | 1 egg      | Mexico             | 24.95  | 3         | /        | MT027593 | Genomic    |
| 191003.B.coc.03 | 1 egg      | Mexico             | 33.79  | 3         | /        | MT027594 | Genomic    |
| 191003.B.coc.04 | 1 egg      | Mexico             | 22.43  | 6         | /        | MT027595 | Genomic    |
| 181119.B.coc.07 | 5 eggs     | Mexico             | 24.42  | 2         | /        | MT027569 | Genomic    |
| 181119.B.coc.21 | 5 eggs     | Mexico             | 28.32  | 2         | /        | MT027582 | Genomic    |
| 181119.B.coc.08 | 10 eggs    | Mexico             | 29.61  | 2         | /        | MT027570 | Genomic    |
| 181119.B.coc.22 | 10 eggs    | Mexico             | 26.43  | 2         | /        | MT027583 | Genomic    |
| 181119.B.coc.03 | immature   | Mexico             | 22.56  | 2         | /        | MT027565 | Genomic    |
| 181119.B.coc.04 | immature   | Mexico             | 22.33  | 2         | /        | MT027566 | Genomic    |
| 181119.B.coc.05 | immature   | Mexico             | 21.46  | 2         | /        | MT027567 | Genomic    |
| 181119.B.coc.11 | immature   | Mexico             | 23.16  | 2         | /        | MT027573 | Genomic    |
| 181119.B.coc.12 | immature   | Mexico             | 24.15  | 2         | /        | MT027574 | Genomic    |
| 181119.B.coc.13 | immature   | Mexico             | 23.94  | 2         | /        | MT027575 | Genomic    |
| 181119.B.coc.14 | immature   | Mexico             | 25.75  | 2         | /        | MT027576 | Genomic    |
| 181119.B.coc.16 | immature   | Mexico             | 23.49  | 2         | /        | MT027578 | Genomic    |
| 181119.B.coc.18 | immature   | Mexico             | 22.45  | 2         | /        | MT027580 | Genomic    |
| 181119.B.coc.19 | immature   | Mexico             | 23.50  | 2         | /        | MT027581 | Genomic    |
| 190604.B.coc.13 | immature   | Mexico             | 24.96  | 2         | /        | MT027588 | Genomic    |
| 190604.B.coc.14 | immature   | Mexico             | 25.09  | 2         | /        | MT027589 | Genomic    |
| 190604.B.coc.15 | immature   | Mexico             | 28.37  | 2         | /        | MT027590 | Genomic    |
| 150727.B.coc.02 | Adult      | South Western, USA | 22.18  | 2         | MT040955 | MG719775 | Genomic    |
| 150827.B.coc.02 | Adult      | South Western, USA | 22.18  | 2         | MT040956 | MT027597 | Genomic    |
| 150827.B.coc.03 | Adult      | Central USA        | 24.49  | 6         | MT040957 | MT027598 | Genomic    |
| 150827.B.coc.04 | Adult      | North Western, USA | 24.77  | 2         | MT040958 | MT027599 | Genomic    |
| 150827.B.coc.06 | Adult      | North Western, USA | 23.68  | 2         | MT040960 | MT027552 | Genomic    |
| 150827.B.coc.12 | Adult      | Western, USA       | 20.39  | 2         | MT040961 | MT027596 | Genomic    |
| 150827.B.coc.17 | Adult      | South Western, USA | 19.65  | 2         | MT040962 | MT027553 | Genomic    |
| 160725.B.coc.05 | Adult      | Central, USA       | 21.45  | 2         | MT040963 | /        | Genomic    |
| 160726.B.coc.01 | Adult      | New Zealand        | 21.56  | 2         | /        | MT027557 | Genomic    |
| 160726.B.coc.02 | Adult      | New Zealand        | 21.02  | 2         | /        | MT027558 | Genomic    |
| 160726.B.coc.03 | Adult      | New Zealand        | 20.48  | 2         | /        | MT027559 | Genomic    |
| 160726.B.coc.04 | Adult      | New Zealand        | 21.98  | 2         | /        | MT027560 | Genomic    |
| 160726.B.coc.05 | Adult      | New Zealand        | 19.43  | 2         | /        | MT027561 | Genomic    |
| 160726.B.coc.06 | Adult      | New Zealand        | 20.96  | 2         | /        | MT027562 | Genomic    |
| 180731.B.coc.04 | Adult      | North Western, USA | 24.42  | 6         | MT040964 | /        | Genomic    |
| 180731.B.coc.05 | Adult      | Western, USA       | 22.91  | 6         | MT040965 | /        | Genomic    |
| 180731.B.coc.06 | Adult      | Western, USA       | 27.14  | 6         | MT040966 | /        | Genomic    |
| 181119.B.coc.01 | Adult      | Mexico             | 21.47  | 2         | /        | MT027563 | Genomic    |
| 181119.B.coc.02 | Adult      | Mexico             | 19.98  | 2         | /        | MT027564 | Genomic    |
| 181119.B.coc.09 | Adult      | Mexico             | 21.83  | 2         | /        | MT027571 | Genomic    |
| 181119.B.coc.10 | Adult      | Mexico             | 19.48  | 2         | /        | MT027572 | Genomic    |
| 181119.B.coc.15 | Adult      | Mexico             | 21.27  | 2         | /        | MT027577 | Genomic    |
| 181119.B.coc.17 | Adult      | Mexico             | 23.74  | 2         | /        | MT027579 | Genomic    |
| 190604.B.coc.09 | Adult      | USDA, Lab Colony   | 21.51  | 2         | /        | MT027584 | Genomic    |
| 190604.B.coc.10 | Adult      | Mexico             | 20.33  | 2         | /        | MT027585 | Genomic    |
| 190604.B.coc.11 | Adult      | Mexico             | 22.67  | 2         | /        | MT027586 | Genomic    |
| 190604.B.coc.12 | Adult      | Mexico             | 24.37  | 2         | /        | MT027587 | Genomic    |



|                        |                            |        |       |   |          |          |              |
|------------------------|----------------------------|--------|-------|---|----------|----------|--------------|
| 190604.B.coc.16        | Adult                      | Mexico | 27.15 | 2 | /        | MT027591 | Genomic      |
| 150827.B.coc.05.col.04 | transformed <i>E. coli</i> | Lab    | 11.23 | 6 | MT040959 | MT027551 | Cloned, 10ng |
| 160725.B.coc.01.col.06 | transformed <i>E. coli</i> | Lab    | 11.55 | 6 | /        | MT027554 | Cloned, 10ng |
| 160725.B.coc.06.col.04 | transformed <i>E. coli</i> | Lab    | 11.78 | 6 | /        | MT027555 | Cloned, 10ng |
| 160725.B.coc.07.col.08 | transformed <i>E. coli</i> | Lab    | 11.67 | 6 | /        | MT027556 | Cloned, 10ng |

| Sample name     | Life Stage | Origin        | Ct-ave | Tech | %   | CO1-Accession | ITS2-Accession | DNA Type |
|-----------------|------------|---------------|--------|------|-----|---------------|----------------|----------|
| 181119.B.coc.06 | 1-egg      | Mexico        | 29.80  | 2    | 100 | /             | TBC            | Genomic  |
| 191003.B.coc.01 | 1-egg      | Mexico        | 33.41  | 3    | 100 | /             | TBC            | Genomic  |
| 191003.B.coc.02 | 1-egg      | Mexico        | 24.95  | 3    | 100 | /             | TBC            | Genomic  |
| 191003.B.coc.03 | 1-egg      | Mexico        | 33.79  | 3    | 100 | /             | TBC            | Genomic  |
| 191003.B.coc.04 | 1-egg      | Mexico        | 22.43  | 6    | 100 | /             | TBC            | Genomic  |
| 181119.B.coc.07 | 5-eggs     | Mexico        | 24.42  | 2    | 100 | /             | TBC            | Genomic  |
| 181119.B.coc.21 | 5-eggs     | Mexico        | 28.32  | 2    | 100 | /             | TBC            | Genomic  |
| 181119.B.coc.08 | 10-eggs    | Mexico        | 29.61  | 2    | 100 | /             | TBC            | Genomic  |
| 181119.B.coc.22 | 10-eggs    | Mexico        | 26.43  | 2    | 100 | /             | TBC            | Genomic  |
| 181119.B.coc.03 | immature   | Mexico        | 22.56  | 2    | 100 | /             | TBC            | Genomic  |
| 181119.B.coc.04 | immature   | Mexico        | 22.33  | 2    | 100 | /             | TBC            | Genomic  |
| 181119.B.coc.05 | immature   | Mexico        | 21.46  | 2    | 100 | /             | TBC            | Genomic  |
| 181119.B.coc.11 | immature   | Mexico        | 23.16  | 2    | 100 | /             | TBC            | Genomic  |
| 181119.B.coc.12 | immature   | Mexico        | 24.15  | 2    | 100 | /             | TBC            | Genomic  |
| 181119.B.coc.13 | immature   | Mexico        | 23.94  | 2    | 100 | /             | TBC            | Genomic  |
| 181119.B.coc.14 | immature   | Mexico        | 25.75  | 2    | 100 | /             | TBC            | Genomic  |
| 181119.B.coc.16 | immature   | Mexico        | 23.49  | 2    | 100 | /             | TBC            | Genomic  |
| 181119.B.coc.18 | immature   | Mexico        | 22.45  | 2    | 100 | /             | TBC            | Genomic  |
| 181119.B.coc.19 | immature   | Mexico        | 23.50  | 2    | 100 | /             | TBC            | Genomic  |
| 190604.B.coc.13 | immature   | Mexico        | 24.96  | 2    | 100 | /             | TBC            | Genomic  |
| 190604.B.coc.14 | immature   | Mexico        | 25.09  | 2    | 100 | /             | TBC            | Genomic  |
| 190604.B.coc.15 | immature   | Mexico        | 28.37  | 2    | 100 | /             | TBC            | Genomic  |
| 150727.B.coc.02 | Adult      | South-Western | 22.18  | 2    | 100 | /             | TBC            | Genomic  |
| 150827.B.coc.02 | Adult      | South-Western | 22.18  | 2    | 100 | /             | TBC            | Genomic  |
| 150827.B.coc.03 | Adult      | Central USA   | 24.49  | 6    | 100 | /             | TBC            | Genomic  |
| 150827.B.coc.04 | Adult      | North-Western | 24.77  | 2    | 100 | /             | TBC            | Genomic  |
| 150827.B.coc.06 | Adult      | North-Western | 23.68  | 2    | 100 | /             | TBC            | Genomic  |
| 150827.B.coc.12 | Adult      | Western-USA   | 20.39  | 2    | 100 | /             | TBC            | Genomic  |
| 150827.B.coc.17 | Adult      | South-Western | 19.65  | 2    | 100 | /             | TBC            | Genomic  |

Formatted Table

Formatted: Centered

|                      |                |                 |       |   |     |   |     |         |
|----------------------|----------------|-----------------|-------|---|-----|---|-----|---------|
| 160725.B.coc.05      | Adult          | Central_USA     | 21.45 | 2 | 100 | / | TBC | Genomic |
| 160726.B.coc.01      | Adult          | New_Zealand     | 21.56 | 2 | 100 | / | TBC | Genomic |
| 160726.B.coc.02      | Adult          | New_Zealand     | 21.02 | 2 | 100 | / | TBC | Genomic |
| 160726.B.coc.03      | Adult          | New_Zealand     | 20.48 | 2 | 100 | / | TBC | Genomic |
| 160726.B.coc.04      | Adult          | New_Zealand     | 21.98 | 2 | 100 | / | TBC | Genomic |
| 160726.B.coc.05      | Adult          | New_Zealand     | 19.42 | 2 | 100 | / | TBC | Genomic |
| 160726.B.coc.06      | Adult          | New_Zealand     | 20.96 | 2 | 100 | / | TBC | Genomic |
| 180731.B.coc.04      | Adult          | North_Western   | 24.42 | 6 | 100 | / | TBC | Genomic |
| 180731.B.coc.05      | Adult          | Western_USA     | 22.91 | 6 | 100 | / | TBC | Genomic |
| 180731.B.coc.06      | Adult          | Western_USA     | 27.14 | 6 | 100 | / | TBC | Genomic |
| 181119.B.coc.01      | Adult          | Mexico          | 21.47 | 2 | 100 | / | TBC | Genomic |
| 181119.B.coc.02      | Adult          | Mexico          | 19.98 | 2 | 100 | / | TBC | Genomic |
| 181119.B.coc.09      | Adult          | Mexico          | 21.82 | 2 | 100 | / | TBC | Genomic |
| 181119.B.coc.10      | Adult          | Mexico          | 19.48 | 2 | 100 | / | TBC | Genomic |
| 181119.B.coc.15      | Adult          | Mexico          | 21.27 | 2 | 100 | / | TBC | Genomic |
| 181119.B.coc.17      | Adult          | Mexico          | 23.74 | 2 | 100 | / | TBC | Genomic |
| 190604.B.coc.09      | Adult          | USDA_Lab_Colonv | 21.51 | 2 | 100 | / | TBC | Genomic |
| 190604.B.coc.10      | Adult          | Mexico          | 20.33 | 2 | 100 | / | TBC | Genomic |
| 190604.B.coc.11      | Adult          | Mexico          | 22.67 | 2 | 100 | / | TBC | Genomic |
| 190604.B.coc.12      | Adult          | Mexico          | 24.27 | 2 | 100 | / | TBC | Genomic |
| 190604.B.coc.16      | Adult          | Mexico          | 27.15 | 2 | 100 | / | TBC | Genomic |
| 150827.B.coc.05.col. | transformed_E. | Lab             | 11.22 | 6 | 100 | / | TBC | Cloned. |
| 160725.B.coc.01.col. | transformed_E. | Lab             | 11.55 | 6 | 100 | / | TBC | Cloned. |
| 160725.B.coc.06.col. | transformed_E. | Lab             | 11.78 | 6 | 100 | / | TBC | Cloned. |
| 160725.B.coc.07.col. | transformed_E. | Lab             | 11.67 | 6 | 100 | / | TBC | Cloned. |

Formatted: Centered

329 **Table 43:** Information on *Bactericera cockerelli* samples tested with Bcoc\_JSK2 assay  
 330 including genomic DNA from adults, immatures, single eggs and egg batches. Location of  
 331 samples collection is also included. All samples gave 100% positives ~~with the assay, samples~~  
 332 ~~were run in at least duplicate~~. GenBank accession numbers relating to sequenced CO1 and  
 333 ITS2 ([MT027551-MT027599](#)) regions are included.

Formatted: Font: 12 pt

Formatted: Font: 18 pt

334 **Figure 1.** CLUSTAL-W alignment of ITS2 regions from closely related *Bactericera* species  
 335 showing variable regions and the gene target for the Bcoc\_JSK2 primer and probe set. Bases

336 shades with black show differences to *B. cockerelli* sequence. Colour highlights locations of  
337 forward primer (blue highlight); reverse primer (green highlight) and probe (yellow  
338 highlight). The probe and reverse primer are reverse compliments of the highlighted regions  
339 here.

### 340 3.3. Specificity and Sensitivity

341 This assay did not amplify DNA from any of the 73 non-target psyllid species or *Solanum*  
342 *tuberosum* DNA when tested at 60 °C with primer concentration 0.2 μM/mol. This Samples  
343 included nine closely related *Bactericera* species with similar ITS2 and CO1 sequences (Tab.  
344 24). Under optimal conditions, false negatives = 0% for all non-target species tested with  
345 pure genomic DNA, giving a diagnostic specificity of 100%. Some suboptimal reaction  
346 conditions showed 33% false positives against high concentrations (10 ng / 1 ng) of  
347 *Bactericera albiventris* cloned DNA (see as mentioned below). All *B. cockerelli* genomic DNA  
348 samples gave positive results (Tab. 43) giving 0% false negatives across 54 biological  
349 replicates and 147 technical replicates; resulting in a diagnostic sensitivity of 100%. These  
350 included *B. cockerelli* specimens from each of the four US biotypes as well as specimens  
351 from New Zealand. These specimens included adults, immature stages and eggs. The assay  
352 can amplify *B. cockerelli* DNA from both cloned and genomic samples. Under optimal  
353 conditions for PCR efficiency and specificity (60 °C, 0.2 μM primer, 1.5 mM MgCl<sub>2</sub>) the limit  
354 of detection was 0.00001 ng DNA across a range of different reaction parameters this  
355 equates to 200 copy numbers of ITS2 calculated using the following equation: Number of  
356 Copies = (ng DNA x 6.022x10<sup>23</sup>) ÷ ((length of gene region in plasmid (4656) + cloned  
357 fragment (700)bpase pairs) \* 1x10<sup>9</sup> \* 660). The copy number calculator available at  
358 <http://scienceprimer.com/copy-number-calculator-for-realtime-pcr> was used. Diagnostic

359 sensitivity was 100% on all DNA extracted from *B. cockerelli* immatures. False negatives  
360 from DNA from egg extractions were 0% for single eggs and 0% for batches of 3 and 10 eggs.

#### 361 **3.4. Repeatability and Reproducibility**

362 No significant differences were found between  $C_t$  means across the different replicates at  
363 different concentrations as tested by two-way ANOVA ( $F_{5, 25} = 0.54$ ,  $p = 0.955$ ). The assay  
364 also performed consistently across different machines and there was no significant  
365 difference between runs across the two machines as tested by two-way ANOVA ( $F_{1, 5} = 1.28$ ,  
366  $p = 0.279$ ).

#### 367 **3.5. Robustness/Optimization**

368 The assays amplified *B. cockerelli* DNA at all primer concentrations,  $MgCl_2$  concentrations  
369 and annealing temperatures with varying levels of efficiency, precision, and sensitivity (Supp  
370 Tabs. S12-S34). At primer concentration, 0.5  $\mu M$ , the assay was less sensitive only amplifying  
371 ~~down~~ to 0.0001 ng DNA. At higher primer concentrations ~~((0.5 and 1.0  $\mu M$ ))~~ the assay  
372 showed higher sensitivity, but efficiency was outside the range for acceptable use. The assay  
373 performed optimally at 0.2  $\mu M$  primer concentration showing good efficiency and high  
374 sensitivity (0.00001 ng DNA) (Supp Tab. S12). Generally, standard deviation of the  $C_t$  was  
375 lower at higher DNA concentrations and some of the primer concentrations showed SD  
376 slightly above the accepted level for quantitative real-time PCR, however this module is  
377 intended for qualitative use. At high DNA concentrations all primer concentrations are  
378 suitable for use with Bcoc\_JSK2 primer and probe set to detect *B. cockerelli* but 0.2  $\mu M$  is  
379 recommended for best results. The assay did not amplify non-target DNA from the 8 other

380 *Bactericera* species tested at the different primer concentrations (0.1, 0.2, 0.3, 0.5 and 1.0  
381  $\mu\text{M}$ ).

382 The  $\text{MgCl}_2$  concentration of the assay made only small differences to the overall  
383 performance of the assay (Supp Tab. [S23](#)) and the assay was able to amplify *B. cockerelli*  
384 DNA at low concentrations (0.000001 ng) at each  $\text{MgCl}_2$  concentration. The precision of the  
385 assay was lower at higher  $\text{MgCl}_2$  concentrations [7.56](#)mM and [9.58](#)mM (Supp Tab. [S23](#)).

386 Sensitivity was slightly higher at 64 °C giving 33.33% (n=3) positives for only 20 copies of *B.*  
387 *cockerelli* DNA (0.000001 ng), however at 64 °C and 66 °C 33.33% (n=3) false positives were  
388 found with 10ng and 1 ng of *B. albiventris* cloned DNA (Supp Tab. [S34](#)). Reactions at 58 °C  
389 were 10 to 100-fold less sensitive than reactions at [64.58](#) °C. For best sensitivity and  
390 specificity, it is suggested that assays using the Bcoc\_JSK2 primer and probe set should be  
391 performed at 60 °C or 62 °C. While higher temperatures appear to be more sensitive, they  
392 are not recommended on unknown samples due to the small likelihood of returning false  
393 positives with *B. albiventris* and possibly other un-tested *Bactericera* spp.

394 It is recommended that this assay be performed at 60 °C – 62 °C, with a  $\text{MgCl}_2$  concentration  
395 of 1.5mM and a primer concentration of 0.2  $\mu\text{M}$ . To test the robustness of these conditions  
396 a multifactorial approach was taken [55]. The assay performed satisfactorily across the  
397 different treatments and was shown to be robust and unaffected by small changes in assay  
398 set-up (Supp Tab. [S45](#)). Each treatment gave 100% positives for amplification of *B. cockerelli*  
399 genomic DNA.

#### 400 4. Discussion

Formatted: Font: Bold, Italic, Underline

401 The Tomato-Potato psyllid is an economically damaging pest of solanaceous plants  
402 that has spread by human mediated dispersal. It causes feeding damage to plants but also is  
403 the major vector of 'Candidatus Liberibacter solanacearum' (Lso), a phloem limited  
404 bacterium that is associated with disease in solanaceous and apiaceous plants. Management  
405 of this insect pest requires accurate identification of *B. cockerelli*, this is often difficult if eggs  
406 or immature life stages only are available for identification. Hitherto, identification of *B.*  
407 *cockerelli* required either considerable expertise in psyllid taxonomy or the lengthy process  
408 of DNA barcoding [54].

Formatted: Normal, No bullets or numbering

409 We have designed and validated the first species-specific, qualitative real-time PCR TaqMan  
410 assay for *B. cockerelli* by using the comparison of 73 non-target species to identify unique  
411 gene regions that were suitable for primer/probe design and species differentiation. The  
412 genus *Bactericera* currently contains 160 species [20] and <1% of these have been tested in  
413 the current study due to the difficulty in obtaining other specimens from the field or lab  
414 colonies. However Europe is home to 26 different species of *Bactericera* [20], 30% of which  
415 have been tested for false positives using this assay. Psyllid species that were tested are  
416 most commonly found in potato and carrot fields in Europe and the wider EPPO region  
417 which should minimize the potential for false positives and ensure the assay is efficient at  
418 detecting outbreaks in European fields. The assay was also tested on nine closely  
419 related *Bactericera* species. The number of species used in our study is relatively high  
420 compared to other reported TaqMan assays for plant pests that report lower numbers of  
421 non-target species [56,57].

422 The assay is based on a 187 bp region of the ITS2 gene region was found to be suitable for  
423 assay design which was suitable as it contained high inter-specific variation consisting of

424 stretches of insertions and deletions (INDELs), ~~which are ideal diagnostic sites for primer~~  
425 ~~and probe design. Although COI is classically used for species discrimination, mutations~~  
426 ~~were less clustered which is likely due to third base degeneracy.~~ The ITS2 region ~~can also~~  
427 ~~be~~en used to distinguish species phylogenetically and ~~has been used~~ to identify cryptic  
428 species in the *Cacopsylla pruni* complex [47]. ~~DNA s~~The sequences obtained from this study  
429 will improve ~~psyllid the current species~~ representation on online DNA databases, reducing  
430 the chance of Type II errors (i.e. misidentification due to lack of conspecific references) [58].  
431 The *B. cockerelli* sequences on which we tested this assay (and many of the non-target  
432 psyllid species) were from different geographic locations to account for intraspecific  
433 variation. *Bactericera cockerelli* specimens from the four USA biotypes and specimens from  
434 New Zealand all gave 100% true positives. ~~It is important to note that the target and non-~~  
435 ~~target specimens consisted of multiple samples of each species from different geographical~~  
436 ~~regions. This reduced the risk of false negatives that may arise if during assay design, the~~  
437 ~~target specimens were obtained from a limited geographic spread and were therefore not~~  
438 ~~representative of the genetic variation within the species. To account for interspecific~~  
439 ~~variation, *B. cockerelli* samples used in the assay validation consisted of specimens from the~~  
440 ~~four USA biotypes and specimens from New Zealand.~~  
441 ~~Species identification can be achieved for *B. cockerelli* by sequencing the ITS2 or COI regions~~  
442 ~~as both loci, to date, have entries in the National Centre for Biotechnology Information~~  
443 ~~(NCBI) database. However, DNA sequencing is a lengthy process compared to real time PCR,~~  
444 ~~which in contrast is a rapid identification method involving fewer pieces of equipment,~~  
445 ~~reagents, and time both for running the sample, and processing it digitally.~~ The success rates  
446 of eradication are dependent on the length of time between introduction, detection, and

447 implementation of eradication measures as *Lso* displays a short transmission time from *B.*  
448 *cockerelli* to potatoes [4,25]. Feasibly, methodology described in this study could be used to  
449 extract DNA from a specimen and test for *B. cockerelli* positives within 6-12 hrs or quicker.

450 This is faster than identification by DNA barcoding and could aid in eradications/ prevention  
451 of incursions. This time could be reduced further if the real-time assay is used in conjunction  
452 with faster DNA extraction protocols.

453 The assay described in this study can identify *B. cockerelli* specimens from all life stages. It is  
454 robust, reliable and can detect 200 copies (0.00001 ng DNA) of the ITS2 gene region. This is  
455 the first assay which uses a TaqMan real-time PCR module to specifically identify this  
456 important pest species. The assay performs well across a range of annealing temperatures,  
457 MgCl<sub>2</sub> concentrations and primer concentrations and is a robust tool that can be used to  
458 give reliable results despite human error, different lab practices, equipment, standard  
459 operating procedures or PCR set-ups.

460 The assay can be used on eggs and immatures, as well as adults of *B. cockerelli*, which will  
461 enable the rapid identification of this species from specimens that may be otherwise  
462 impossible to identify. For example, identification of eggs of *B. cockerelli* is not possible  
463 using classical taxonomy methods alone and it is now possible to rapidly identify this cryptic  
464 life stage. In addition, adult females and immatures are considerably more difficult to  
465 identify compared to adult males. The genus *Bactericera* currently contains 160 species [20]  
466 and <1% of these have been tested in the current study due to the difficulty obtaining other  
467 specimens from the field or lab colonies. However Europe is home to 26 different species of  
468 *Bactericera* 30% of which have been validated using this assay [20]. This assay has been  
469 tested against the *Bactericera* species which are most commonly found in potato and carrot

Formatted: Font: Italic



470 ~~fields in Europe and the wider EPPO region which should minimize the potential for false~~  
471 ~~positives and ensure the assay is efficient at detecting outbreaks in European fields. There~~  
472 ~~are currently no methods described within the EPPO "agreed diagnostic protocol for~~  
473 ~~identification of *B. cockerelli*" [4]. In addition, the current EPPO control system for *B.*~~  
474 ~~*cockerelli* and Lso [4] highlights the importance of identifying psyllid eggs and immatures on~~  
475 ~~various plant materials during inspections and monitoring but gives minimal guidelines for~~  
476 ~~achieving this. Validation of this assay demonstrates that it would be a reliable and accurate~~  
477 ~~tool for use in this area and it will therefore be prepared for consideration by the EPPO~~  
478 ~~diagnostic panel. This assay is also useful for monitoring *B. cockerelli* occurrence at several~~  
479 ~~spatial scales, from local border checks to regional surveys which use different trapping~~  
480 ~~methods (water, sticky, suction, aerial balloon traps) where no host plant data is available.~~  
481 ~~Given the sensitivity of this assay it should be possible to detect *B. cockerelli* DNA from~~  
482 ~~insect fragments (e.g. legs, heads) if DNA extraction is adequate. However, further~~  
483 ~~validation should be performed to ensure the assay performs adequately on samples~~  
484 ~~obtained from different traps. This assay should be tested on additional congeneric species~~  
485 ~~and other closely related Triozidae psyllids. Another limitation of this assay is that it cannot~~  
486 ~~yet be taken out into the field, making it less portable than LAMP assays or other NGS~~  
487 ~~sequencing techniques such as Nanopore technology.~~

488 ~~The ability to identify insects to species accurately and quickly is essential to support~~  
489 ~~national biosecurity measures for the prevention and early detection of new pests and~~  
490 ~~vectors of disease. Psyllids can be difficult to identify and certain species of concern, such as~~  
491 ~~*B. cockerelli*, require skilled specialist taxonomists to accurately differentiate between~~  
492 ~~closely related species that may or may not be of risk to plant health. Entomologists with~~

493 the skills required to do so are a valuable yet sparse resource and incorrect identification of  
494 a psyllid species could lead to a delay in national response or inappropriate allocation of  
495 resources to resolve a problem that is not present, possibly leading to the unnecessary  
496 destruction of crops. We have designed a functional tool for reliable, rapid, robust and  
497 accurate identification of the tomato-potato psyllid *B. cockerelli* to support national  
498 biosecurity measures should this pest be found within the EPPO region or other regions  
499 where it could become damaging to agriculture. The situation in New Zealand and recent  
500 interceptions of *B. cockerelli* on aubergine in plant material imported into the UK from  
501 Mexico highlight the risk and pathways for introduction into new areas [42]. Furthermore  
502 immature stages of *B. cockerelli* are commonly intercepted on vegetable material from the  
503 Western United States and Mexico and adults are occasionally found on leafy vegetables  
504 such as lettuce [42]. Recent studies suggest *B. cockerelli* can utilize multiple host plants  
505 within the Solanaceae and other plant families; the potential for eggs and immatures of *B.*  
506 *cockerelli* to be present on yet undetermined host plants is likely.

507 The identification of psyllids using classical taxonomy is often aided using information about  
508 the host plant on which the specimen was found [59]. However, although psyllids are  
509 typically monophagous, some species feed on a few closely related plant species. For  
510 example, northern hemisphere pest species, such as *B. cockerelli* and *B. trigonica*, feed on  
511 several plant species within a family [60]. In the case of *B. cockerelli* its range of host plants  
512 (reproductive, food and incidental) is much wider than originally thought [9,16,61,62]. Adult  
513 psyllids may also settle on plants that they do not feed on, known as a casual plant [62]. It is  
514 possible that: A) *B. cockerelli* can utilise other host plants and could be overlooked; B) other  
515 psyllid species morphologically/ecologically similar to *B. cockerelli* could be mistaken for this

516 pest if only considering the host plant on which they are found. Therefore, the identification  
517 of suspected host plant material alone cannot be reliably used for psyllid identification and  
518 for most psyllid species their host plant range is unknown or fragmentary at best. This assay  
519 can be used to study life parameters of *B. cockerelli* in the field such as oviposition on  
520 reproductive host plants, as eggs can now be identified.

521 Additionally, host plant data is sometimes unavailable depending on the trapping method  
522 employed. For example, indirect host plant data is available from trapping methods at  
523 ground level (e.g. water/sticky traps) with less data available for insects caught beyond the  
524 vegetation layer (e.g. 12.2m suction traps or aerial balloon traps). Unlike spot checks  
525 performed by inspectors directly on plant produce, canopy level or aerial traps which  
526 provide data at field or regional level [63,64]. A diagnostic assay for *B. cockerelli* is therefore  
527 useful for monitoring its occurrence at several spatial scales, from local border checks to  
528 regional surveys. As some collection methods obtain specimens where host plant data is not  
529 available, this tool enables rapid screening of psyllids from suction traps or those collected  
530 in sticky traps, pan traps or similar. However, further validation should be performed to  
531 ensure the assay performs adequately on *B. cockerelli* fragments obtained from these kinds  
532 of traps. The assay can also be used in areas currently known to have *B. cockerelli* to easily  
533 quantify numbers from the field or to monitor migration, distribution and spread of this pest  
534 species.

535 Further validation of this assay however should include its use in several different  
536 laboratories with different practitioners. Different reaction mixes should be tested for their  
537 suitability with this assay and its compatibility with alternative qPCR machines. It is also

538 ~~valuable to test these primers in a set-up using an inter-collating dye such as Sybr Green.~~  
539 ~~Additionally, this assay should be tested on further samples of *Bactericera* and other closely~~  
540 ~~related Triozidae psyllids. Further validation of this assay should be performed on more~~  
541 ~~*Bactericera* species not included in this study and on DNA from Solanaceous host plants.~~  
542 ~~This will ensure false positives are not obtained from DNA extracted from complex matrices.~~  
543 ~~Due to being based on real-time PCR chemistry, one limitation of this assay is that it cannot~~  
544 ~~be taken out into the field, making it less portable than a LAMP assay or other NGS~~  
545 ~~sequencing techniques such as Nanopore technology.~~

546 In conclusion a rapid, specific, robust, repeatable and reliable real-time PCR assay has now  
547 been validated and can be used to detect the important pest *B. cockerelli*. This ~~will be work~~  
548 ~~has developed~~ an important tool for ~~detection of this pest and will~~ providinge much-needed  
549 support to prevent new outbreaks ~~of this pest~~. The assay can be implemented by  
550 practitioners with molecular biology experience and does not require personnel to have  
551 classical taxonomic knowledge of insects or psyllids; making this tool more accessible than  
552 traditional methods. The assay can be used to complement field surveillance and may  
553 facilitate further ecological studies of *B. cockerelli*- requiring the identification of immatures  
554 and eggs~~that were previously not possible as they required the identification of immatures~~  
555 ~~and eggs in the field or were too time consuming without this assay~~. The strength of this  
556 assay lies in the collaboration of molecular biologists and classical taxonomists working  
557 together to build a reliable database for DNA barcoding of psyllids.

## 558 **6. Funding**

559 This work was supported by the EU Horizon2020 Programme under grant agreement No.  
560 635646, POnTE (Pest Organisms Threatening Europe) and the Scottish Government  
561 [RRL/001/14]. The Rothamsted Insect Survey, a National Capability, is funded by the  
562 Biotechnology and Biological Sciences Research Council under the Core Capability Grant  
563 BBS/E/C/000J0200. The authors declare there is no conflict of interest regarding the  
564 publishing of this article.

## 565 **7. Acknowledgements**

566 We thank A. Fereres & C. A. Antolínez Delgado (Institute of Agricultural Sciences, CSIC,  
567 Spain), A. Nissinen (Natural Resources Institute Finland), J. Munyaneza, R. Cooper, M. Heidt,  
568 K. Swisher Grimm (USDA Agricultural Research Services), S. Bulman (Plant and Food  
569 Research, New Zealand), A. Jensen, S. Halbert (Florida Department of Agriculture &  
570 Consumer Services, Dept. of Plant Industry) and Alberto Flores (Universidad Autónoma  
571 Agraria Antonio Narro) for specimens; and thank C. Jeffries, L. Webster, V. Mulholland, and  
572 A. Reid (SASA) for providing advice. [We also thank SASA Potato Genotyping team for](#)  
573 [providing Potato DNA.](#)

## 574 **8. Author Contributions**

575 **JS-K:** assay design and validation, investigation, performed analysis, collected data,  
576 bioinformatics, visualization, writing- original draft, supervision, project administration;  
577 **MJS:** assay design and validation, investigation, performed analysis, collected data,  
578 bioinformatics, visualization, writing- original draft, supervision, project administration; **YA:**  
579 investigation, performed analysis, validation, data curation, collected data; **MC:** provided  
580 resources, data analysis, curation of data, investigation, taxonomy expertise; **FH:** conceived  
581 the project, methodology, supervision, writing- original draft; **DO:** provided resources, data

582 analysis, curation of data, taxonomy expertise, writing – review and edit; **AG**: provided  
583 resources, data analysis, taxonomy expertise, writing- review and edit; **JB**: conceived the  
584 project, provided resources, methodology, writing- review and edit, supervision, project  
585 administration; **RS**: provided resources, data analysis, methodology; **DK**: conceived the  
586 project, conceptualization, funding acquisition, methodology, supervision, project  
587 administration.

## 588 9. References

- 589 1. Munyaneza JE, Sengoda VG, Crosslin JM, Garzon-Tiznado JA, Cardenas-Valenzuela  
590 OG. First report of "*Candidatus Liberibacter solanacearum*" in tomato plants in  
591 Mexico. Plant Dis. 2009;93: 1076. doi:10.1094/PDIS-93-10-1076A
- 592 2. Wallis RL. Ecological studies on the Potato Psyllid as a pest of potatoes. USDA Tech  
593 Bull. 1955;1107: 25.
- 594 3. Hansen AK, Trumble JT, Stouthamer R, Paine TD. A new huanglongbing species,  
595 "*Candidatus Liberibacter psyllauros*," found to infect tomato and potato, is vectored  
596 by the psyllid *Bactericera cockerelli* (Sulc). Appl Environ Microbiol. 2008;74: 5862–  
597 5865. doi:10.1128/AEM.01268-08
- 598 4. EPPO. PM 9/25 (1) *Bactericera cockerelli* and '*Candidatus Liberibacter solanacearum*.'  
599 EPPO Bull. 2017;47: 513–523. doi:10.1111/epp.12442
- 600 5. Liefting LW, Perez-Egusquiza ZC, Clover GRG, Anderson JAD. A new '*Candidatus*  
601 *Liberibacter*' species in *Solanum tuberosum* in New Zealand. Plant Dis. 2008;92:  
602 1474–1474. doi:10.1094/pdis-92-10-1474a
- 603 6. Liefting LW, Sutherland PW, Ward LI, Paice KL, Weir BS, Clover GRG. A new '

- 604 Candidatus *Liberibacter*' species associated with diseases of solanaceous crops. *Plant*  
605 *Dis.* 2009;93: 208–214. doi:10.1094/PDIS-93-3-0208
- 606 7. Munyaneza JE. Zebra Chip disease of potato: Biology, epidemiology, and  
607 management. *Am J Potato Res.* 2012;89: 329–350. doi:10.1007/s12230-012-9262-3
- 608 8. Crosslin JM, Hamm PB, Eggers JE, Rondon SI, Sengoda VG, Munyaneza JE. First report  
609 of Zebra Chip disease and "*Candidatus Liberibacter solanacearum*" on potatoes in  
610 Oregon and Washington State. *Plant Dis.* 2012;96: 452. doi:10.1094/PDIS-10-11-0894
- 611 9. Kaur N, Cooper WR, Durringer JM, Badillo-Vargas IE, Esparza-Díaz G, Rashed A, et al.  
612 Survival and development of Potato Psyllid (Hemiptera: Trioziidae) on Convolvulaceae:  
613 Effects of a plant-fungus symbiosis (*Periglandula*). *PLoS One.* 2018;13: 1–19.  
614 doi:10.1371/journal.pone.0201506
- 615 10. Knowlton G, Thomas W. Host plants of the Potato Psyllid. *J Econ Entomol.* 1934;27:  
616 547.
- 617 11. Pletsch D. The Potato Psyllid *Paratrioza cockerelli* (Sulc), its biology and control. *Bull*  
618 *Mont Agric Exp Stn.* 1947;446: 1–95.
- 619 12. Wallis RL. Potato Psyllid selection of host plants. *J Econ Entomol.* 1951;44: 815–817.  
620 doi:10.1093/jee/44.5.815
- 621 13. Butler CD, Trumble JT. The Potato Psyllid, *Bactericera cockerelli* (Sulc) (Hemiptera:  
622 Trioziidae): life history, relationship to plant diseases, and management strategies.  
623 *Terr Arthropod Rev.* 2012;5: 87–111. doi:10.1163/187498312X634266
- 624 14. Prager SM, Esquivel I, Trumble JT. Factors influencing host plant choice and larval

- 625 performance in *Bactericera cockerelli*. PLoS One. 2014;9.  
626 doi:10.1371/journal.pone.0094047
- 627 15. Martin NA. Host plants of the Potato / Tomato Psyllid : A cautionary tale. Weta.  
628 2008;35: 12–16.
- 629 16. Cooper WR, Horton DR, Miliczky E, Wohleb CH, Waters TD. The weed link in Zebra  
630 Chip epidemiology: suitability of non-crop Solanaceae and Convolvulaceae to Potato  
631 Psyllid and “*Candidatus Liberibacter solanacearum*.” Am J Potato Res. 2019; 262–271.  
632 doi:10.1007/s12230-019-09712-z
- 633 17. Swisher KD, Henne DC, Crosslin JM. Identification of a fourth haplotype of *Bactericera*  
634 *cockerelli* (Hemiptera: Trioziidae) in the United States. J Insect Sci. 2014;14: 1–7.  
635 doi:10.1093/jisesa/ieu023
- 636 18. Swisher KD, Munyaneza JE, Crosslin JM. High resolution melting analysis of the  
637 Cytochrome Oxidase I gene identifies three haplotypes of the Potato Psyllid in the  
638 United States. Environ Entomol. 2012;41: 1019–1028. doi:10.1603/EN12066
- 639 19. Swisher KD, Sengoda VG, Dixon J, Echegaray E, Murphy AF, Rondon SI, et al.  
640 Haplotypes of the potato psyllid, *Bactericera cockerelli*, on the wild host plant,  
641 *Solanum dulcamara*, in the pacific Northwestern United States. Am J Potato Res.  
642 2013;90: 570–577. doi:10.1007/s12230-013-9330-3
- 643 20. Ouvrard D. 2018 Psyll’list - The World Psylloidea Database. 2019. Available:  
644 <http://www.hemiptera-databases.com/psyllist>
- 645 21. Teulon DA., Workman PJ, Thomas KL, Nielsen MC. *Bactericera cockerelli*: Incursion,



- 646 dispersal and current distribution on vegetable crops in New Zealand. New Zeal Plant  
647 Prot. 2009;62: 136–144.
- 648 22. Australian Government Department of Agriculture and Water Resources. Detection of  
649 *Bactericera cockerelli* (Tomato-potato psyllid) in Western Australia. Canberra; 2017.  
650 Available:  
651 [https://www.ippc.int/en/countries/australia/pestreports/2017/02/detection-of-](https://www.ippc.int/en/countries/australia/pestreports/2017/02/detection-of-bactericera-cockerelli-tomato-potato-psyllid-in-western-australia/)  
652 [bactericera-cockerelli-tomato-potato-psyllid-in-western-australia/](https://www.ippc.int/en/countries/australia/pestreports/2017/02/detection-of-bactericera-cockerelli-tomato-potato-psyllid-in-western-australia/)
- 653 23. Munyaneza JE, Crosslin JM, Upton JE. Association of *Bactericera cockerelli*  
654 (Homoptera: Psyllidae) with “Zebra Chip” a New Potato Disease in Southwestern  
655 United States and Mexico. J Econ Entomol. 2007;100: 656–663. doi:10.1603/0022-  
656 0493(2007)100[656:AOBCHP]2.0.CO;2
- 657 24. Munyaneza JE, Fisher TW, Sengoda VG, Garczynski SF, Nissinen A, Lemmetty A.  
658 Association of “*Candidatus Liberibacter solanacearum*” With the Psyllid, *Trioz*  
659 *apicalis* (Hemiptera: Triozidae) in Europe. J Econ Entomol. 2010;103: 1060–1070.  
660 doi:10.1603/EC10027
- 661 25. Munyaneza JE, Sengoda VG, Stegmark R, Arvidsson AK, Anderbrant O, Yuvaraj JK, et  
662 al. First report of “*Candidatus Liberibacter solanacearum*” associated with psyllid-  
663 affected carrots in Sweden. Plant Dis. 2012;96: 453–453. doi:10.1094/PDIS-10-11-  
664 0871
- 665 26. Liefting LW, Weir BS, Pennycook SR, Clover GRG. “*Candidatus Liberibacter*  
666 *solanacearum*”, associated with plants in the family Solanaceae. Int J Syst Evol  
667 Microbiol. 2009;59: 2274–2276. doi:10.1099/ijs.0.007377-0

- 668 27. Bextine B, Aguilar E, Rueda A, Caceres O, Sengoda VG, McCue KF, et al. First report of  
669 "*Candidatus Liberibacter solanacearum*" on tomato in El Salvador. Plant Dis. 2013;97:  
670 1245. doi:10.1094/PDIS-03-13-0248-PDN
- 671 28. Munyaneza JE, Sengoda VG, Aguilar E, Bextine B, McCue KF. First report of  
672 "*Candidatus Liberibacter solanacearum*" on pepper in Honduras. Plant Dis. 2014;98:  
673 154. doi:10.1094/PDIS-06-13-0598-PDN
- 674 29. Munyaneza JE, Sengoda VG, Aguilar E, Bextine BR, McCue KF. First report of  
675 "*Candidatus Liberibacter solanacearum*" infecting eggplant in Honduras. Plant Dis.  
676 2013;97: 1654. doi:10.1094/PDIS-06-13-0641-PDN
- 677 30. Aguilar E, Sengoda VG, Bextine B, McCue KF, Munyaneza JE. First report of  
678 "*Candidatus Liberibacter solanacearum*" on tobacco in Honduras. Plant Dis. 2013;97:  
679 1376. doi:10.1094/PDIS-04-13-0453-PDN
- 680 31. Munyaneza JE, Sengoda VG, Aguilar E, Bextine B, McCue KF. First report of  
681 "*Candidatus Liberibacter solanacearum*" associated with psyllid-infested tobacco in  
682 Nicaragua. Plant Dis. 2013;97: 1244. doi:10.1094/PDIS-03-13-0247-PDN
- 683 32. Johnson D. Canadian Potato Psyllid and Zebra Chip Monitoring Network Report. News  
684 Lett Can Potato Psyllid Zebra Chip Monit Netw. 2017; 1–19. doi:10.15713/ins.mmj.3
- 685 33. Castillo Carrillo C, Fu Z, Burckhardt D. First record of the Tomato Potato Psyllid  
686 *Bactericera cockerelli* from South America. Bull Insectology. 2019;72: 85–91.
- 687 34. Swisher Grimm KD, Garczynski SF. Identification of a new haplotype of '*Candidatus*  
688 *Liberibacter solanacearum*' in *Solanum tuberosum*. Plant Dis. 2019;103: 468–474.

- 689 doi:10.1094/PDIS-06-18-0937-RE
- 690 35. Nelson WR, Fisher TW, Munyaneza JE. Haplotypes of “*Candidatus Liberibacter*  
691 *solanacearum*” suggest long-standing separation. *Eur J Plant Pathol.* 2011;130: 5–12.  
692 doi:10.1007/s10658-010-9737-3
- 693 36. Wen A, Mallik I, Alvarado VY, Pasche JS, Wang X, Li W, et al. Detection, distribution,  
694 and genetic variability of ‘*Candidatus Liberibacter*’ species associated with zebra  
695 complex disease of potato in North America. *Plant Dis.* 2009;93: 1102–1115.  
696 doi:10.1094/pdis-93-11-1102
- 697 37. Borges KM, Cooper WR, Garczynski SF, Thinakaran J, Jensen AS, Horton DR, et al.  
698 “*Candidatus Liberibacter solanacearum*” associated with the psyllid, *Bactericera*  
699 *maculipennis* (Hemiptera: Trioziidae). *Environ Entomol.* 2017;46: 210–216.  
700 doi:10.1093/ee/nvw174
- 701 38. CNAS. Economic Impacts of Zebra Chip on the Texas Potato Industry. Texas; 2006.
- 702 39. Greenway G, Rondon SI. Economic impacts of Zebra Chip in Idaho, Oregon, and  
703 Washington. *Am J Potato Res.* 2018;95: 362–367.
- 704 40. Soliman T. Economic impact assessment of invasive plant pest in the European Union.  
705 Wageningen University, Wageningen, Netherlands. 2012.
- 706 41. DEFRA. Pest Alert :*Bactericera cockerelli*. 2017. Available:  
707 [https://planthealthportal.defra.gov.uk/ph-](https://planthealthportal.defra.gov.uk/ph-api/pests/27077/notices/6682/documents/4183/document)  
708 [api/pests/27077/notices/6682/documents/4183/document](https://planthealthportal.defra.gov.uk/ph-api/pests/27077/notices/6682/documents/4183/document)
- 709 42. EPPO. *Bactericera cockerelli*. *EPPO Bull.* 2013;43: 202–208. doi:10.1111/epp.12044

- 710 43. Burckhardt D, Ouvrard D. A revised classification of the jumping plant-lice  
711 (Hemiptera: Psylloidea). *Zootaxa*. 2012;34: 1–34.
- 712 44. Bell JR, Alderson L, Izera D, Kruger T, Parker S, Pickup J, et al. Long-term phenological  
713 trends, species accumulation rates, aphid traits and climate: Five decades of change  
714 in migrating aphids. *J Anim Ecol*. 2015;84: 21–34. doi:10.1111/1365-2656.12282
- 715 45. Sjolund MJ, Ouvrard D, Kenyon D, Highet F. Developing an RT-PCR assay for the  
716 identification of psyllid species. *Proc Crop Prot North Britain*. 2016; 279–282.
- 717 46. Percy DM. Radiation, diversity, and host-plant interactions among island and  
718 continental legume-feeding psyllids. *Evolution (N Y)*. 2003;57: 2540–2556.  
719 doi:10.1111/j.0014-3820.2003.tb01498.x
- 720 47. Peccoud J, Labonne G, Sauvion N. Molecular test to assign individuals within the  
721 *Cacopsylla pruni* complex. *PLoS One*. 2013;8: 1–8. doi:10.1371/journal.pone.0072454
- 722 48. EPPO. PM 7/129 (1) DNA barcoding as an identification tool for a number of regulated  
723 pests. *EPPO Bull*. 2016;46: 501–537. doi:10.1111/epp.12344
- 724 49. Thompson JD, Higgins DG, Gibson TJ. CLUSTAL W: Improving the sensitivity of  
725 progressive multiple sequence alignment through sequence weighting, position-  
726 specific gap penalties and weight matrix choice. *Nucleic Acids Res*. 1994;22: 4673–  
727 4680. doi:10.1093/nar/22.22.4673
- 728 50. Altschul SF, Gish W, Miller W, Myers EW, Lipman DJ. Basic local alignment search tool.  
729 *J Mol Biol*. 1990;215: 403–410. doi:https://doi.org/10.1016/S0022-2836(05)80360-2
- 730 51. Clark K, Karsch-Mizrachi I, Lipman DJ, Ostell J, Sayers EW. GenBank. *Nucleic Acids Res*.

- 731 2015/11/20. 2016;44: D67–D72. doi:10.1093/nar/gkv1276
- 732 52. Untergasser A, Cutcutache I, Koressaar T, Ye J, Faircloth B, Remm M, et al. Primer3--  
733 new capabilities and interfaces. *Nucleic Acids Res.* 2012;40: e115. Available:  
734 <http://www.ncbi.nlm.nih.gov/pmc/articles/PMC3424584/>
- 735 53. Ye J, Coulouris G, Zaretskaya I, Cutcutache I, Rozen S, Madden T. Primer-BLAST: A tool  
736 to design target-specific primers for polymerase chain reaction. *BMC Bioinformatics.*  
737 2012;13: 134.
- 738 54. Liu D, Trumble JT, Stouthamer R. Genetic differentiation between eastern populations  
739 and recent introductions of Potato Psyllid (*Bactericera cockerelli*) into western North  
740 America. *Entomol Exp Appl.* 2006;118: 177–183. doi:10.1111/j.1570-  
741 7458.2006.00383.x
- 742 55. European Network of GMO Laboratories. Definition of minimum performance  
743 requirements for analytical methods of GMO testing. 2015. doi:10.2788/65827
- 744 56. Li D, Fan Q-H, Waite DW, Gunawardana D, George S, Kumarasinghe L. Development  
745 and validation of a Real-Time PCR assay for rapid detection of Two-Spotted Spider  
746 Mite, *Tetranychus urticae* (Acari: Tetranychidae). *PLoS One.* 2015;10: e0131887.  
747 doi:10.1371/journal.pone.0131887
- 748 57. Dhami MK, Dsouza M, Waite DW, Anderson D, Li D. Real-Time PCR assay for the  
749 identification of the Brown Marmorated Stink Bug (*Halyomorpha halys*). *Front Mol*  
750 *Biosci.* 2016;3: 1–6. doi:10.3389/fmolb.2016.00005
- 751 58. Virgilio M, Jordaens K, Breman FC, Backeljau T, de Meyer M. Identifying insects with

752 incomplete DNA barcode libraries, African fruit flies (Diptera: Tephritidae) as a test  
753 case. PLoS One. 2012;7. doi:10.1371/journal.pone.0031581

## 754 10. Supporting Information Captions

755 ~~Supplementary Table 1. Information on non-target psyllid species and specimens tested~~  
756 ~~using the *B. cockerelli* real-time PCR assay Bcoc\_JSK2 showing number of technical replicates~~  
757 ~~and false positives. All non-target species gave 0% false positives. GenBank Accession~~  
758 ~~numbers are included for ITS2 and CO1 regions if sequencing was successful.~~

759 **Supplementary Table 12.** Assay performance across a range of primer concentrations at 60  
760 °C and 1.5mM MgCl<sub>2</sub>. Optimum primer concentration was 0.2 μM showing the best  
761 combination of r<sup>2</sup>, slope, efficiency, and sensitivity.

762 **Supplementary Table 23.** Performance of *B. cockerelli* real-time PCR assay at different  
763 magnesium chloride (MgCl<sub>2</sub>) concentrations.

764 **Supplementary Table 34.** Summary of standard curves from optimisation of temperature on  
765 Bcoc\_JSK2 real-time PCR assay for identification of *B. cockerelli*. All DNA concentrations  
766 tested above the limit of detection (10ng, 1 ng, 0.1ng, 0.01ng 0.001ng, 0.0001ng, 0.00001ng,  
767 0.000001ng)-were gave 100% positives across 3 x replicates. LOD is given for each  
768 temperature. All non-target *Bactericera* species tested at different DNA concentration gave  
769 0% false positives except for *B. albiventris* cloned DNA which cross reacted at 64 and 66 °C.  
770 (\*reactions at 64 °C gave 33.33% positives at 20 copy numbers).

771 **Supplementary Table 45.** Set-up and results of multifactorial robustness experiment testing  
772 the Bcoc\_JSK2 assay on *B. cockerelli* genomic DNA. All treatments showed 100% positives  
773 despite small changes to the overall set-up.

774



## **RESPONSE TO REVIEWERS**

Dear Dr Sean Michael Prager,

Please find enclosed our revised manuscript entitled “A diagnostic real-time PCR assay for the rapid identification of the tomato-potato psyllid, *Bactericera cockerelli* (Šulc, 1909) and development of a psyllid barcoding database”. We thank you and the reviewers for your careful review of our submitted manuscript and the opportunity to resubmit an improved version. We find the comments to be fair and constructive and have helped to improve the final manuscript. Please see below our responses to points raised by the reviewer’s comments and the amendments we have made to the final manuscript. We provide a copy of the resubmitted manuscript with track changes and track changes accepted. Line numbers refer to those given in the resubmitted manuscript with track changes accepted.

We hope that you will consider this revised manuscript of a high enough standard to be published in PLOS ONE.

Yours Sincerely,

Dr Jason C Sumner-Kalkun

(on behalf of all co-authors)



## **EDITOR'S COMMENTS TO AUTHORS**

15/01/2020

Editor: Sean Michael Prager, PhD  
Dear Dr. Sumner-Kalkun,

Thank you for submitting your manuscript to PLOS ONE. After careful consideration, we feel that it has merit but does not fully meet PLOS ONE's publication criteria as it currently stands. Therefore, we invite you to submit a revised version of the manuscript that addresses the points raised during the review process.

This manuscript fell in a grey area between minor and major revisions. Three different reviewers examined the manuscript, and I also reviewed it. I agree with the 1st reviewer that you may be stretching a bit and could possibly focus some. This work will provide a useful tool. I think that alone makes it worth publication, and that opinion is shared by the reviewers. I also think that it is a complete and comprehensive piece of work. I, therefore, encourage you to focus on the comments from reviewer 1 and those about length etc. when preparing a resubmission.

We look forward to receiving your revised manuscript.

Kind regards,

Sean Michael Prager, Ph.D.  
Academic Editor  
PLOS ONE

Response:

- Thank you for considering our work for publication in your journal. We found all reviewer comments to be useful and constructive and appreciate your overall assessment of the manuscript. We are pleased to have the opportunity to resubmit an improved version. We have made considerable efforts to condense the introduction and discussion section to include only relevant information and to streamline the manuscript. We agree that there was some duplication and repetition in the discussion, and it has been re-written accordingly. We decided, due to the technical nature of the paper that a separate results and discussion section was more appropriate. We have addressed the reviewer concerns regarding data availability and all sequence data has been uploaded to GenBank and is now free to be made publicly available. We hope that our amendments are deemed adequate to meet the high standards of PLOS ONE and are excited about the possibility of publishing with you.

## **REVIEWER COMMENTS TO AUTHOR**

Reviewer #1: This manuscript describes a qPCR assay to identify potato psyllid intercepted in shipments. The assay is paramount to Europe's ability to detect potential introductions of this psyllid, which would be harmful to agricultural production. The authors describe the assay and confirmed that it does not amplify the ITS gene of other psyllids. My major concern for the manuscript is that it is overwritten and over-interpreted. The study is very simple - qPCR assay to detect potato psyllid - yet the text is over 50 pages long, includes unrelated information in the introduction, and includes an overly long discussion. The manuscript should be re-written to focus only on the assay and its use in trade commodities. Specific comments are provided in an attached document. I will apologize for my handwriting.

## **MAJOR POINTS**

We appreciate your thorough assessment of our manuscript and thank you for your time. We found your comments very constructive and helpful. We have taken the care to reduce the introduction and discussion sections considerably to provide more focus on the assay and its uses, removing a lot of the duplication. The manuscript has been edited down to 31 pages + supplementary material. We attempted to produce a combined results and discussion section but felt that, due to the technical nature of the paper, keeping these separate was preferable. We hope that you will agree with this assessment on reading the improved version.

On the recommendation of the reviewer on line 486 of the previous manuscript we have performed the assay on Potato DNA to check for cross-reaction. No false positives were obtained from 8x reps of 3 Potato samples "Maris Piper" variety.

## **MINOR POINTS**

- 1. Line 45: Abstract overwritten, stats to be removed, word count reduced**
  - The abstract Line 21-39 has been reduced in size with all stats removed and is now within the word limit (252 words)
- 2. Line 47: Remove "-" in "Potato-Psyllids"**
  - Changed to "Potato Psyllid" now line 41
- 3. Line 49: "The feeding of...." To be changed to "Feeding by"**
  - Changed as suggested now line 43
- 4. Line 53: Psyllid yellows refers to the feeding damage described above.**
  - Removed to avoid confusion and improve accuracy. Line 47
- 5. Lines 55-56: Change "...is also able to reproduce on..." to "...can also complete development on species of..."**
  - Changed as suggested line 49-50
- 6. Lines 56-58: Statement not deemed true**
  - Statement removed line 51
- 7. Line 61: Remove statement on Lso transmission to non-host plants of *B. cockerelli***
  - Statement removed line 53
- 8. Line 64-65: Remove claims about *B. cockerelli* populations observed to differ in their ability to spread Lso**
  - Changed to: "Evidence suggests that these genetic types may differ in their ability to spread Lso..." Lines 56-57
- 9. Line 86: Haplotype B is also found in *Bactericera maculipennis***
  - Information added to the text line 71

**10. Line 111: typo capsicum not italics**

- Changed to "...*Capsicum*..." line 84

**11. Line 223: This table is referenced a lot, make it a real table**

- Supp Tab. S1 now changed to Table 1. In results section Line 244-250. Cited on lines: 244. Supp Tabs 2-4 renumbered to Supp Tabs 1-3 and Tables 1-3 renumbered to Tables 2-4.

**12. Line 276: Submitted to NCBI? Provide accession numbers**

- Accession numbers added to Table 1. Lines 246-252 and Table 4. Lines 271-276

**13. Line 314-315: change "...cloned DNA as mentioned below." To "..DNA below".**

- Changed to "...cloned DNA (see below)." Line 290

**14. Line 319: change "immatures" to "nymphs"**

- The term "immatures" is preferred by leading psyllid taxonomists Daniel Burckhardt and David Ouvrard, that latter of whom is an author on this paper. See ref: (Burckhardt et al. 2014). We have kept the term "immatures" or "immature life stages" throughout.

Burckhardt D, Ouvrard D, Queiroz D, Percy D (2014) Psyllid Host-Plants (Hemiptera: Psylloidea): Resolving a Semantic Problem. Florida Entomol 97:242–246 .  
<https://doi.org/10.1653/024.097.0132>

**15. Line 411: "...Bactericera..." to be italicised**

- Changed to italics. Line 354

**16. Lines 439-441: Section to be re-written as inaccurate wording used**

- This section was removed in the re-write of the discussion.

**17. Line 468: Suggestion to perform further validation on Solanaceous DNA**

- 3 x samples of *Solanum tuberosum* 'Maris Piper' were tested and were negative results added to lines: 194-196 and 284-285. Also results of primer blast etc. did not return any hits for *Solanum* species or any plant sequences.

**Reviewer #2**

- We are thankful to the reviewer for their detailed and careful examination of our paper. They have provided very useful, constructive comments regarding the technical aspects of the paper and have informed us of errors in the finer details. We hope we have incorporated changes to their satisfaction, and we have endeavoured to clear up the technical details that were missing or incorrect.

**1. Data availability**

- Psyllid DNA sequences have been uploaded to GenBank and accession numbers are provided in Tab1. And Tab4; lines 246-252 and 271-276 respectively.

**2. Page 8 Line 163: What part of the body is used for micro-dissection to extract DNA? The authors should describe the micro-dissection procedure in more detail rather than only citing the papers.**

- The non-destructive DNA extraction method is described on lines 121 – 132. "Micro-dissection" was used here to describe the piercing of the abdomen and thorax. "Micro-dissection" has been changed to "pierced" as a more appropriate term (line 126).

**3. Page 8 Line 172: "For amplification of ITS2 primers CA55p8sFcm-F and CA28sB1d-R [60] and for amplification of CO1 gene regions arthropod barcoding Primers LCO1490 and HCO2198 [61]." The authors should check the grammar here. It is not a complete sentence. It could be "For amplification of ITS2, primers CA55p8sFcm-F and CA28sB1d-R [60] were used, and for amplification of CO1 gene regions, arthropod barcoding Primers LCO1490 and HCO2198 [61] were used."**

- Changed as suggested lines 135- 137
- 4. **Page 10 Line 204: "DNA was extracted as above using the non-destructive method, amplified and cloned into competent Escherichia coli cells using the TOPO TA cloning kit (Thermo-Fisher)." The authors should specify what genes (ITS2 or CO1?) they amplified for cloning, and what restriction enzyme (EcoRI?) they used to linearize the plasmid.**
  - Information added and moved from later section 2.5.2 Sensitivity. Now line 171-178
- 5. **Page 10 Line 212: The authors need to list the real time PCR cycling conditions here, for example XX degrees for XX seconds.**
  - Added lines 178-181
- 6. **Page 10 Line 223: "All reactions with non-target psyllid DNA were run in conjunction with a TaqMan Exogenous Internal Positive Control Reagent Kit (Applied Biosystems) to ensure false positives were not obtained due to inhibition within the reaction". Here, "ensure" should be "rule out the possibility that"**
  - Changed as suggested lines 196-201
- 7. **Page 11 Line 226: "DNA from all non-target psyllids was sequenced to ensure psyllid DNA was present in all reactions to rule out false negatives due to inefficient DNA extraction." What DNA was sequenced? PCR product from ITS2 or CO1? The authors need to specify**
  - Details now added to new Tab 1 and citation to table included on lines 246-252
- 8. **Page 11 Line 239: "6 subsequent dilutions were made. Stock DNA 10 ng/μl was linearised using EcoRI restrictions enzyme (New England Biolabs)," Here "6 subsequent dilutions" should be "8 subsequent dilutions", according to the nine point 10-fold dilution series mentioned on Page 11 Line 236.**
  - Corrected Line 212-213
- 9. **Page 12 Line 252: "A six point 1:10 dilution series starting at 10ng/μl was used with each dilution being performed in triplicate." Here, "six point" should be "nine point" according to Page 11 Line 236.**
  - Only 6 points were used for repeatability. This is sufficient to analyse standard curves between runs. Lines 222-223 refer to sensitivity experiments only.
- 10. **Page 12 Line 263: "For each tested parameter, optimization was performed across an eight point 1:10 dilution series starting at 10ng DNA." Here, "eight point" should be "nine point", "10ng" should be "10ng/μl".**
  - Corrected. Line 234
- 11. **In Supplementary table S1, green and red color coding should be explained in the text. What does TBC mean? Accession numbers should be given for all the sequences. Accession numbers in Table 3 should also be given and TBC should be explained.**
  - We apologise for this error; this colouring has been removed as was an artefact of preparing the table and shouldn't have been included in the submitted version. TBC was used to show we were waiting for accession numbers. Accession numbers are now added to tables and TBC removed. Tab. 1 lines: 246-247 Tab.4 lines:
- 12. **Page 14 Line 289: "CO1 genes showed higher similarity and generally less conserved and variable regions compared to ITS2 regions." Here "less conserved and variable" should be "less variable".**

- Corrected line 266

**13. Page 17 Line 310: “0.2 μ/mol” should be “0.2 μM”.**

- Corrected line 285

**14. Page 18 Line 324: “The copy number calculator available at <http://scienceprimer.com/copy-number-calculator-for-realtime-pcr> was used.” Here a hyperlink should be created. According to the link and the formula given, 0.00001ng DNA equals 4.879×10000 copies, if length of gene region is considered 187bp (product length of ITS2 in real time PCR). However, the authors calculated that it equals to 200bp. Please double check the calculation.**

- Limit of detection is actually 0.000001 ng DNA. This mistake of 10 fold higher amounts stated in the text was found throughout and in tables. We have now corrected them. The correct equation should be:

Number of Copies = (ng DNA(0.000001) x 6.022x10<sup>23</sup>) ÷ ((length of plasmid 4656bp + cloned fragment 700bp) \* 1x10<sup>9</sup> \* 660) = 170.36 copy numbers.

**15. Page 18 Line 337: “At primer concentration, 0.5 μM the assay was less sensitive only amplifying up to 0.001 ng DNA.” It should be “At primer concentration 0.5 μM, the assay was less sensitive only amplifying up to 0.001 ng DNA.”**

- Corrected. Lines 313-314

**16. Page 18 Line 338: “At higher primer concentrations (0.5 and 1.0) the assay showed higher sensitivity” Here “(0.5 and 1.0)” should be “(1.0 μM)”.**

- Corrected. Line 314

**17. Page 19 Line 350: “The precision of the assay was lower at higher MgCl<sub>2</sub> concentrations 6mM and 8mM (Supp Tab. S3).” Here “6mM and 8mM” should be “7.5mM and 9mM”.**

- Corrected. Lines 326-327

**18. Page 19 Line 354: “Reactions at 58 °C were 10 to 100-fold less sensitive than reactions at 58 °C.” Here it should be “Reactions at 58 °C were 10 to 100-fold less sensitive than reactions at 64 °C.”**

- Corrected. Lines 330-331

**19. Page 20 Line 367: “We have designed and validated the first species-specific, qualitative real-time PCR TaqMan assay for B. cockerelli by using the comparison of 73 non-target species to identify unique gene regions that were suitable for primer/probe design and species differentiation.” Here “qualitative” should be “quantitative”.**

- Changed to quantitative. Line 351

### Reviewer #3

- We thank the reviewer for their thoughtful assessment of our manuscript and are pleased that only minor corrections were found throughout. The corrections have improved the manuscript greatly and have ironed out some important technical errors.

We hope that our amendments are deemed satisfactory and have covered the issues they have raised.

**1. Page 8 line 175: please replace amount of primers used with final concentration of primers (or add this)**

- Added. Line 138

**2. Page 10 line 213: please add cycling conditions of real time PCR, as done for CO1 and ITS2 amplification**

- Added lines 178-181

**3. Table 1: should include also *B. cockerelli*, so to include fragment size of amplicons for this species. In alternative, fragment sizes can be added to the main text**

- *B. cockerelli* added to table 2. Line 262-263

**4. Table 3: not clear what the "/" symbol in the CO1 column means**

- Samples with / were not amplified in this region. Accession numbers for each sample have been added and this is explained better in the text. Lines: 252 Tab.1 ; 276 Tab. 4

**5. Page 17 line 310: please check spelling of concentration**

- Corrected to  $\mu\text{M}$ . Line 285

**6. Page 17 line 316: numbers seem not to add up: how many technical replicates were used per sample?**

- Information on technical reps is incorporated into table 4. Some samples were tested in duplicate, triplicate or 6x replicates.

**7. Page 18 line 323: I have tried the formula myself using the concentration (0.00001 ng) and fragment size (187 bp) specified by the authors, but I get a quite different number of ITS2 copies (about 50,000 versus 200). Please double check, and add actual numbers to the formula.**

- Limit of detection is actually 0.000001 ng DNA. This mistake of 10-fold higher amounts stated in the text was found throughout and in tables. We have now corrected them. The correct equation should be:

Number of Copies =  $(\text{ng DNA}(0.000001) \times 6.022 \times 10^{23}) \div ((\text{length of plasmid } 4656\text{bp} + \text{cloned fragment } 700\text{bp}) * 1 \times 10^9 * 660) = 170.36 \text{ copy numbers.}$

**8. Of some concern is the author's answer to the data accessibility question. Authors stated that they are not going to make all data available, with a generic "Some restrictions will apply". Please explain what data will not be made accessible and why.**

- All data will be made available. Accession numbers were not available at the time of submission as they were restricted by one or more of our projects until we had consent to upload them to public databases.
